# Supplementary material
Source: Research Square preprint supplement (doi:10.21203/rs.3.rs-10063729/v1)
Supplement: Supplementary file 1 [file fe8660f00b1da032cff2e680.xlsx]

## Sheet: samples_clinical_subunits_table
sample number	data name	pregnant status	type	HGB (g/L)	MCV (fL)	MCH (pg)	α (pmol/mL)	β (pmol/mL)	δ (pmol/mL)	γ (pmol/mL)	ζ (pmol/mL)	μ (pmol/mL)	βHb E Detected status
KHYF0001	H202300073	Non-pregnant	normal	136	84	29.3	2044.35	2205.24	80.5232	6.51936	0.551527	1.04037	Not Detected
KHYF0002	H202300539	Non-pregnant	normal	144	88.3	29.1	3758.26	3446.24	100.609	11.3722	0.800344	0.41147	Not Detected
KHYF0003	H202300967	Pregnant	normal	133	92	32.1	3719.61	3505.06	116.839	97.4812	0.850332	1.96611	Not Detected
KHYF0004	H202300993	Pregnant	normal	154	93.1	33.9	3319.96	3178.9	97.961	75.7543	0.429794	1.33548	Not Detected
KHYF0005	H202300994	Pregnant	normal	125	94	32.6	3483.03	3246.39	111.057	25.4445	0.771036	1.14522	Not Detected
KHYF0006	H202300996	Pregnant	normal	145	91.3	30.9	3575.86	3247.51	99.2777	210.075	0.53949	1.72087	Not Detected
KHYF0007	H202301008	Pregnant	normal	99	87.5	27.4	2971.58	2943.52	86.9053	28.1093	0.325534	1.02113	Not Detected
KHYF0008	H202301015	Pregnant	normal	135	93.5	32.5	3269.37	3137.18	96.4391	33.5577	0.752002	1.06146	Not Detected
KHYF0009	H202301022	Pregnant	normal	147	91	31.4	3842.27	3530.22	117.618	10.5412	1.83842	0.724319	Not Detected
KHYF0010	H202301025	Pregnant	normal	133	91.4	32	3555.6	3312.21	107.208	56.722	1.77559	1.13331	Not Detected
KHYF0011	H202301029	Non-pregnant	normal	127	79.2	26.7	3701.18	3605.02	108.513	9.15403	0.001	0.984496	Not Detected
KHYF0012	H202301030	Pregnant	normal	132	95.3	30.7	3023.11	2872.01	84.0033	28.7824	0.20853	0.955858	Not Detected
KHYF0013	H202301031	Pregnant	normal	133	84.4	29.3	3094.33	2931.89	89.0799	18.535	1.49999	0.712494	Not Detected
KHYF0014	H202301032	Pregnant	normal	129	90.6	31.9	3649.12	3415.64	112.191	26.9437	1.38684	1.01128	Not Detected
KHYF0015	H202301033	Pregnant	normal	118	97.1	33.7	3532.96	3169.96	106.033	191.083	0.740998	1.97602	Not Detected
KHYF0016	H202301039	Pregnant	α3.7/αα	124	83.1	28.3	3521.15	3231.26	91.1724	80.3919	1.68563	3.08055	Not Detected
KHYF0017	H202301084	Pregnant	βHb E/βN	128	79.6	26.6	4229.83	4005.88	164.721	34.0847	0.198391	0.633558	Detected
KHYF0018	H202301150	Pregnant	normal	144	83.5	29.1	3714.09	3421.08	122.859	22.3512	0.0358982	0.940022	Not Detected
KHYF0019	H202301172	Pregnant	α3.7/αα	113	83.6	26.1	3404.37	3159.04	83.2499	7.80227	0.001	2.01132	Not Detected
KHYF0020	H202301183	Non-pregnant	normal	123	81.1	25.1	3266.59	3143.88	93.6081	8.31494	0.699628	0.55836	Not Detected
KHYF0021	H202301251	Non-pregnant	normal	138	95.8	31.8	3562.71	3281.99	101.892	37.9804	0.0568882	0.987604	Not Detected
KHYF0022	H202301254	Pregnant	normal	152	89.4	31	4054.46	3565.58	108.45	221.874	0.915516	2.19255	Not Detected
KHYF0023	H202301258	Pregnant	normal	136	97.1	33.2	3297.85	2682.4	84.533	171.094	0.596719	2.14807	Not Detected
KHYF0024	H202301259	Pregnant	normal	154	88.3	31	3571.12	3094.03	59.4935	68.2572	1.82305	0.87727	Not Detected
KHYF0025	H202301261	Non-pregnant	βHb E/βN	145	73.8	23.8	3702.37	3206.74	127.51	88.822	0.146076	0.168535	Detected
KHYF0026	H202301276	Pregnant	normal	140	93.9	32.1	3384.88	2793.44	91.3738	34.5346	1.03236	1.22729	Not Detected
KHYF0027	H202301277	Pregnant	normal	138	90.6	30.1	3158.03	2898.13	99.0837	11.5327	0.82966	0.212387	Not Detected
KHYF0028	H202301279	Pregnant	normal	136	92	30.1	3288.45	2700.79	88.6621	6.30475	0.100338	0.09583	Not Detected
KHYF0029	H202301290	Non-pregnant	normal	139	86.9	29.8	3572.31	3230.1	101.836	9.45932	0.011298	1.11451	Not Detected
KHYF0030	H202301297	Pregnant	normal	145	90.7	32.2	3716.58	3668.94	124.272	49.5537	0.79364	1.28982	Not Detected
KHYF0031	H202301326	Non-pregnant	normal	100	92.2	30	2637.76	2314.72	75.3162	11.392	0.491291	0.354726	Not Detected
KHYF0032	H202301335	Pregnant	normal	139	90.3	30.6	3405.76	3044.29	104.063	24.1424	0.795329	0.429392	Not Detected
KHYF0033	H202301357	Pregnant	normal	144	88.6	30.4	3563.48	3237.96	98.0729	33.0283	1.39465	0.952824	Not Detected
KHYF0034	H202301366	Non-pregnant	normal	131	92.6	31.3	3275.13	3200.96	104.951	11.6571	0.001	0.537788	Not Detected
KHYF0035	H202301367	Pregnant	normal	125	94.2	31.7	3036.67	3014	93.6976	28.8465	0.001	0.795426	Not Detected
KHYF0036	H202301369	Pregnant	normal	146	86.7	30.9	2938.2	2948.34	96.9763	2.35821	0.001	0.494594	Not Detected
KHYF0037	H202301371	Non-pregnant	normal	133	86	28.2	3377.94	3346.76	86.7934	40.5218	0.63604	0.747992	Not Detected
KHYF0038	H202301384	Non-pregnant	normal	150	84.6	29.6	4282.54	4288.08	135.973	34.2699	1.3855	0.700847	Not Detected
KHYF0039	H202301387	Pregnant	normal	118	87.9	28.5	3483.23	3301.81	98.8487	11.1214	0.279686	0.71689	Not Detected
KHYF0040	H202301388	Pregnant	normal	120	97.3	34	3414.38	3216.16	99.7066	9.90148	0.133333	0.785732	Not Detected
KHYF0041	H202301390	Pregnant	normal	122	91.8	31.4	3016.9	2992.54	98.9159	30.665	0.65	0.66469	Not Detected
KHYF0042	H202301392	Pregnant	normal	120	95.2	31.9	2918.18	2936.95	93.4365	30.3504	0.001	0.644895	Not Detected
KHYF0043	H202301399	Non-pregnant	normal	141	85.2	30.8	3270.43	2970.51	100.109	9.15984	1.0794	0.526384	Not Detected
KHYF0044	H202301400	Pregnant	normal	131	85.4	29.5	2787.47	3040.79	44.7078	0.001	0.145043	0.46697	Not Detected
KHYF0045	H202301413	Pregnant	normal	146	89.4	31	3302.22	3197.94	90.3481	9.52817	1.07831	0.387649	Not Detected
KHYF0046	H202301416	Pregnant	normal	118	91.3	30.3	2725.44	2614.06	76.3121	65.3491	0.001	1.02349	Not Detected
KHYF0047	H202301417	Pregnant	normal	126	93.2	30.7	5281.15	4407.42	168.876	13.9888	1.04429	0.474421	Not Detected
KHYF0048	H202301420	Non-pregnant	normal	147	94.1	32.2	3873.65	3442.16	104.365	25.5003	0.001	0.824508	Not Detected
KHYF0049	H202301422	Non-pregnant	normal	136	91.6	31.9	3416.1	3398.2	119.602	47.8919	0.883764	0.644096	Not Detected
KHYF0050	H202301426	Pregnant	normal	129	97	33.1	2948.34	3050.07	91.1724	35.8213	0.107831	0.949642	Not Detected
KHYF0051	H202301430	Non-pregnant	normal	153	92.6	30.7	3398.94	2926.62	77.1028	13.7728	1.61986	0.525541	Not Detected
KHYF0052	H202301444	Pregnant	normal	139	91.7	30.5	3209.68	2750.57	100.859	12.3175	0.668674	0.676582	Not Detected
KHYF0053	H202301453	Pregnant	normal	140	89.6	30.2	3230.92	2606.75	88.3488	5.62448	0.320628	0.410397	Not Detected
KHYF0054	H202301470	Non-pregnant	normal	143	89.6	29.7	3811.46	3246.73	89.3074	2.75075	0.282811	0.0116328	Not Detected
KHYF0055	H202301472	Non-pregnant	normal	145	88.8	29.9	4211.44	3575.44	118.711	30.957	0.13319	0.530469	Not Detected
KHYF0056	H202301484	Pregnant	β0/βN	108	64.5	21	2722.75	2420.19	176.548	72.7963	0.644717	0.532038	Not Detected
KHYF0057	H202301539	Pregnant	normal	140	96	33.5	2564.66	2447.46	76.8044	17.1664	0.0808819	0.13098	Not Detected
KHYF0058	H202301570	Pregnant	normal	139	98.1	33.3	3767.78	3016.34	100.285	62.7543	0.130763	0.706175	Not Detected
KHYF0059	H202301572	Pregnant	normal	136	88.1	29.9	3699.75	3277.94	116.962	22.6218	1.17163	0.0234469	Not Detected
KHYF0060	H202301573	Pregnant	normal	119	88.2	29.2	2916.42	2634.15	87.8117	7.47608	0.381872	0.263011	Not Detected
KHYF0061	H202301590	Non-pregnant	normal	160	91	30	3571.37	3532.6	121.557	19.6081	0.001	0.50004	Not Detected
KHYF0062	H202301593	Pregnant	normal	145	96	32	3304.02	3507.44	101.945	66.6133	0.001	1.21293	Not Detected
KHYF0063	H202301609	Pregnant	normal	129	92.6	31.1	3249.64	2773.48	91.717	27.6452	0.135727	0.734709	Not Detected
KHYF0064	H202301619	Pregnant	normal	140	87.6	29.9	3722.75	3514.24	107.487	107.962	0.0730523	1.4134	Not Detected
KHYF0065	H202301681	Pregnant	normal	122	95.5	30.7	2966.23	2680.36	80.7694	25.7175	0.459959	0.606482	Not Detected
KHYF0066	H202301686	Pregnant	normal	130	91.7	29.9	2755.76	2487.61	79.0872	9.28519	0.001	0.412846	Not Detected
KHYF0067	H202301692	Pregnant	normal	133	82.3	28.4	2911.93	3052.42	106.104	2.16817	0.001	0.355415	Not Detected
KHYF0068	H202301706	Pregnant	normal	145	91.3	30.7	3119.58	2992.44	93.8505	48.8225	0.351355	0.415717	Not Detected
KHYF0069	H202301726	Non-pregnant	normal	141	92	31.2	3344.76	3394.9	95.82	15.3123	0.897288	0.357435	Not Detected
KHYF0070	H202301729	Non-pregnant	normal	150	92.1	30.4	3480.54	3166.86	92.7949	11.5423	0.926016	0.447552	Not Detected
KHYF0071	H202301732	Non-pregnant	normal	147	91.6	31.8	3900.33	3610.12	111.415	31.8057	0.26287	0.70613	Not Detected
KHYF0072	H202301734	Non-pregnant	normal	133	91.7	30.8	3665.14	3751.9	118.651	12.9027	0.090678	0.573892	Not Detected
KHYF0073	H202301735	Non-pregnant	normal	141	93.1	32.3	3680.3	3553.68	122.273	60.7435	0.842016	1.21908	Not Detected
KHYF0074	H202301736	Pregnant	normal	129	87.9	30.1	2688.63	2662	84.6785	43.8466	0.635032	0.689436	Not Detected
KHYF0075	H202301738	Pregnant	normal	138	87.3	30.5	4133.4	3832.48	134.791	9.33967	1.1219	0.274392	Not Detected
KHYF0076	H202301750	Non-pregnant	normal	135	91.4	30.4	3184.06	3086.76	102.832	23.9097	0.001	0.544226	Not Detected
KHYF0077	H202301753	Non-pregnant	normal	157	95.2	32.8	4152.19	4075.58	138.469	339.874	2.54428	3.15122	Not Detected
KHYF0078	H202301772	Non-pregnant	normal	135	87.4	28.7	3220.99	2708.81	86.1108	4.92498	1.04622	0.241277	Not Detected
KHYF0079	H202301778	Pregnant	normal	131	83.7	28.5	3144.22	2911.83	89.106	29.8815	0.223247	0.43048	Not Detected
KHYF0080	H202301780	Pregnant	normal	136	93.8	32.4	2895.75	2573.56	77.9085	9.60105	0.216023	0.01	Not Detected
KHYF0081	H202301827	Pregnant	normal	120	94.6	32.3	3070.71	2716.09	94.1079	5.62496	1.24135	0.226854	Not Detected
KHYF0082	H202301828	Pregnant	--SEA/αα	112	66.9	22.3	1985.02	1953.2	55.909	12.2024	25.5931	0.632781	Not Detected
KHYF0083	H202301842	Pregnant	normal	107	88.9	28.2	2658.39	2348.75	66.118	5.22826	0.099162	0.383623	Not Detected
KHYF0084	H202301843	Pregnant	normal	123	92.5	30.8	2919.2	2493.29	85.4804	11.839	0.194099	0.159107	Not Detected
KHYF0085	H202301846	Pregnant	normal	136	99.3	31	2824.98	2530.11	88.3674	1.40838	0.331178	0.0196359	Not Detected
KHYF0086	H202301856	Pregnant	normal	133	89.3	30.3	3347.46	2816.25	97.1292	6.67391	0.107713	0.118837	Not Detected
KHYF0087	H202301861	Pregnant	normal	127	86.3	28.5	3043.01	2681.99	88.7106	8.56373	0.840504	0.01	Not Detected
KHYF0088	H202301870	Pregnant	normal	138	89.1	30.2	3361.72	2834.14	97.7558	113.787	0.0919212	1.26555	Not Detected
KHYF0089	H202301871	Pregnant	normal	134	86.2	29.5	3146.34	2860.15	91.4036	24.1649	0.0911904	0.203012	Not Detected
KHYF0090	H202301873	Pregnant	normal	143	96.6	34.3	3407.6	2876.84	94.4958	75.0528	0.14873	0.672445	Not Detected
KHYF0091	H202301885	Non-pregnant	normal	153	81.3	26.6	3990.59	3114.91	103.649	23.3946	0.8673	0.01	Not Detected
KHYF0092	H202301889	Pregnant	normal	101	94.2	32.3	3179.6	3004.95	102.105	21.493	1.07646	0.0725422	Not Detected
KHYF0093	H202301921	Pregnant	normal	112	91.7	29.2	2271.61	1867.79	61.9329	6.837	0.287658	0.93536	Not Detected
KHYF0094	H202301930	Pregnant	--SEA/αα	102	63.9	8.7	1995.52	1818.46	50.6534	8.38995	29.5386	0.86617	Not Detected
KHYF0095	H202301959	Pregnant	normal	131	89.3	31.9	2888.6	2616.95	91.5901	19.341	0.275999	0.198764	Not Detected
KHYF0096	H202301960	Pregnant	normal	122	86.5	29.4	2699.21	2426.04	76.7932	2.5765	0.102623	0.123069	Not Detected
KHYF0097	H202301969	Non-pregnant	--SEA/αα	149	64.8	20	3653.66	3119.36	93.3582	2.23666	34.3451	1.05739	Not Detected
KHYF0098	H202301975	Pregnant	normal	128	95	31.8	3136.41	2737	88.1772	5.23289	0.33668	0.504317	Not Detected
KHYF0099	H202301992	Non-pregnant	--SEA/αα	131	69	21.5	2793.31	2606.07	76.092	25.7591	39.5632	1.37869	Not Detected
KHYF0100	H202302072	Pregnant	--SEA/αα	134	66.4	21.5	3102.05	2533.82	70.7768	15.2256	31.1573	1.17919	Not Detected
KHYF0101	H202302077	Pregnant	normal	137	93.3	31.6	3288.78	2667.16	84.0369	16.3842	1.59592	0.858178	Not Detected
KHYF0102	H202302081	Pregnant	normal	121	93.2	30.4	2740.36	2398.67	76.6478	15.691	0.706751	0.670632	Not Detected
KHYF0103	H202302102	Pregnant	normal	104	76.9	23.8	2548.6	2227	65.9501	0.446158	0.327508	0.423731	Not Detected
KHYF0104	H202302113	Pregnant	normal	139	83.8	29.3	3031.49	2411.28	87.9049	75.6131	0.501824	1.03822	Not Detected
KHYF0105	H202302125	Pregnant	normal	127	88.3	31.8	2742.93	2430.42	84.906	33.0485	1.02413	1.06693	Not Detected
KHYF0106	H202302198	Non-pregnant	normal	138	88.8	30.3	3220.09	2780.66	92.6681	4.83073	0.730514	0.348192	Not Detected
KHYF0107	H202302229	Non-pregnant	normal	145	92.3	30.3	3550.61	3312.48	112.254	12.4718	0.0985152	0.678314	Not Detected
KHYF0108	H202302234	Non-pregnant	normal	156	91.6	29.9	3577.33	3018.01	109.886	8.5026	0.33311	0.561127	Not Detected
KHYF0109	H202302245	Pregnant	normal	144	89.4	30.4	3588.2	3478.54	109.58	30.17	0.279905	0.99456	Not Detected
KHYF0110	H202302278	Pregnant	--SEA/αα	123	63.4	19.9	2993.69	2818.06	84.4435	25.0326	43.15	2.19292	Not Detected
KHYF0111	H202302304	Pregnant	normal	82	66.32	19.22	2211.14	2170.53	49.7806	2.47584	0.001	0.630125	Not Detected
KHYF0112	H202302307	Pregnant	normal	140	87.7	30.5	3581.99	3376.85	121.162	2.79883	1.96846	0.392777	Not Detected
KHYF0113	H202302327	Pregnant	normal	132	86.1	30	3057.19	2845.73	95.0292	12.0362	0.435061	0.687527	Not Detected
KHYF0114	H202302362	Pregnant	normal	146	90.6	31.9	3678.3	3504.72	121.669	34.1144	0.114131	1.16587	Not Detected
KHYF0115	H202302364	Non-pregnant	normal	116	91.7	29.1	4040.32	3781.48	125.108	13.9021	0.938364	0.506789	Not Detected
KHYF0116	H202302368	Pregnant	normal	144	88.4	29.3	3990.22	3715.86	121.494	74.9579	0.001	0.7992	Not Detected
KHYF0117	H202302376	Pregnant	normal	136	89.3	29.6	3229.21	3149.22	84.7344	10.4825	1.36122	0.539423	Not Detected
KHYF0118	H202302389	Pregnant	normal	139	85.4	29.3	4026.96	3790.32	120.915	2.59312	1.00657	0.884004	Not Detected
KHYF0119	H202302401	Pregnant	normal	117	97.7	34.5	2714.25	2548.23	75.6071	27.9954	1.61011	1.05598	Not Detected
KHYF0120	H202302428	Pregnant	normal	129	86.3	29.1	3542.56	3423.46	110.796	9.58218	0.246809	0.955192	Not Detected
KHYF0121	H202302441	Pregnant	normal	127	87.8	29.9	3585.47	3344.82	123.146	16.4471	1.34686	0.581048	Not Detected
KHYF0122	H202302444	Pregnant	--SEA/αα	127	74.42	22.9	3167.43	2921.08	81.1238	141.573	54.0842	2.76079	Not Detected
KHYF0123	H202302451	Pregnant	normal	121	89.8	30.7	3228.14	3034.98	105.272	13.3704	0.001	0.670174	Not Detected
KHYF0124	H202302456	Pregnant	--SEA/αα	123	66.8	21.6	2979.72	2888.27	83.6863	32.3707	33.91	1.52063	Not Detected
KHYF0125	H202302461	Pregnant	α3.7/αα	121	81.8	27.8	3457.78	3213.14	117.916	57.4983	0.001	1.293	Not Detected
KHYF0126	H202302476	Non-pregnant	normal	132	95.9	31.9	2703.26	2258.35	74.13	21.6544	0.0468367	0.977244	Not Detected
KHYF0127	H202302488	Pregnant	normal	112	99.4	32.7	3087.75	2880.45	90.2884	45.8526	0.623986	1.16587	Not Detected
KHYF0128	H202302505	Pregnant	normal	136	85.8	29.7	3563.89	3401.36	119.789	10.3924	0.001	0.817552	Not Detected
KHYF0129	H202302508	Non-pregnant	normal	142	91.8	31.4	3458.72	3251.76	117.905	20.8176	1.15332	0.488282	Not Detected
KHYF0130	H202302510	Pregnant	α3.7/αα	138	83.2	28.3	4150.97	3957.94	116.727	6.00646	1.89378	1.34169	Not Detected
KHYF0131	H202302516	Pregnant	normal	154	86.7	31.7	3049.42	2871.78	90.7248	41.3764	0.001	0.818144	Not Detected
KHYF0132	H202302558	Pregnant	α3.7/αα	133	77.5	25.8	3084.11	2921.08	91.1052	12.4908	1.07822	1.39682	Not Detected
KHYF0133	H202302617	Pregnant	normal	135	85.6	29.9	3813.63	3540.76	116.954	18.1219	0.001	0.76812	Not Detected
KHYF0134	H202302631	Pregnant	normal	162	91.1	31.9	3502.44	3253.39	104.168	0.404577	0.536197	0.568594	Not Detected
KHYF0135	H202302642	Pregnant	normal	128	92.8	31.8	4055.44	3710.42	129.043	147.33	1.11418	1.95153	Not Detected
KHYF0136	H202302643	Pregnant	normal	148	92.8	31.8	3993.98	3818.2	134.049	27.3402	0.111964	0.910052	Not Detected
KHYF0137	H202302648	Non-pregnant	normal	146	80.7	27.5	3957.9	3691.72	126.783	61.0901	0.35427	0.602686	Not Detected
KHYF0138	H202302663	Non-pregnant	normal	126	88.5	31	3822.49	3607.4	119.155	104.209	0.0956508	1.23277	Not Detected
KHYF0139	H202302669	Pregnant	α3.7/αα	136	85.32	28.1	3296.91	2925.7	84.7754	52.1841	1.58978	2.03026	Not Detected
KHYF0140	H202302672	Non-pregnant	normal	112	82	27	2445.18	2258.76	66.5544	21.1547	0.0844704	0.556347	Not Detected
KHYF0141	H202302680	Non-pregnant	normal	142	87.8	29.3	3634.74	3289.33	110.128	38.4861	0.149915	0.743774	Not Detected
KHYF0142	H202302684	Pregnant	normal	128	90.5	31.2	2948.87	2691.92	89.3447	57.7108	1.64926	0.593154	Not Detected
KHYF0143	H202302685	Pregnant	normal	121	92.5	32.4	3327.72	3032.36	101.292	42.0649	0.715411	0.88356	Not Detected
KHYF0144	H202302686	Non-pregnant	normal	155	90.1	29.6	3356.49	3173.63	93.7274	2.42053	1.04345	0.582928	Not Detected
KHYF0145	H202302696	Pregnant	normal	127	85.2	29.5	3172.21	2768.76	91.1836	29.6869	1.69352	0.898138	Not Detected
KHYF0146	H202302698	Pregnant	normal	144	85.4	28.8	3406.46	3165.2	90.6875	8.60219	0.181037	0.723313	Not Detected
KHYF0147	H202302701	Non-pregnant	normal	131	88	28.1	3600.75	3292.66	103.086	74.5768	0.0900228	0.97717	Not Detected
KHYF0148	H202302703	Pregnant	normal	150	88.5	31.3	3767.01	3540.42	100.363	26.3229	0.140406	1.10697	Not Detected
KHYF0149	H202302710	Pregnant	normal	139	88.7	29.1	2792.13	2619.43	99.9528	9.28697	0.932652	0.92204	Not Detected
KHYF0150	H202302712	Pregnant	normal	147	91.9	31.5	3669.68	3387.28	108.177	17.1937	0.437287	0.795574	Not Detected
KHYF0151	H202302720	Pregnant	normal	142	85.9	30.8	3881.37	3659.42	120.397	22.2313	0.865032	0.578754	Not Detected
KHYF0152	H202302725	Non-pregnant	normal	142	91.8	31.6	3077.78	2894.45	86.4353	31.9303	0.0821654	0.824582	Not Detected
KHYF0153	H202302733	Non-pregnant	normal	126	75.5	23.9	2883.08	2829.75	74.0517	0.001	0.431861	0.50115	Not Detected
KHYF0154	H202302738	Non-pregnant	normal	136	86.2	29.8	3729.09	3354.37	100.203	6.77694	1.27294	0.500751	Not Detected
KHYF0155	H202302748	Non-pregnant	normal	136	90.7	30.7	3878.31	3602.3	112.396	17.8738	0.176946	0.617367	Not Detected
KHYF0156	H202302751	Pregnant	normal	153	83.2	28.9	3573.53	3281.41	87.1477	8.26211	0.269615	0.575631	Not Detected
KHYF0157	H202302754	Pregnant	normal	148	90.6	31.6	3511.18	2923.83	100.956	15.3633	2.25918	0.563621	Not Detected
KHYF0158	H202302755	Pregnant	normal	140	86.3	30.4	3665.67	3055.21	104.82	17.5498	0.11482	0.747474	Not Detected
KHYF0159	H202302756	Non-pregnant	normal	147	92.6	30.3	2349.78	1935.82	58.0947	31.9873	0.226783	0.977466	Not Detected
KHYF0160	H202302758	Pregnant	normal	117	86.9	28.8	3362.53	2565.54	79.5124	9.52247	0.420781	0.891034	Not Detected
KHYF0161	H202302760	Non-pregnant	β0/βN	113	63.1	20.2	2756.21	2413.42	153.706	167.723	1.58508	0.910792	Not Detected
KHYF0162	H202302761	Non-pregnant	--SEA/αα	129	72.3	22.4	3307.7	3043.85	81.4147	100.43	38.9071	2.20964	Not Detected
KHYF0163	H202302762	Non-pregnant	normal	105	29.6	24.2	3505.71	3110.97	90.598	24.4522	0.131477	0.76479	Not Detected
KHYF0164	H202302764	Non-pregnant	normal	141	84.3	28.1	3508.73	3005.16	104.108	114.25	3.61091	2.1904	Not Detected
KHYF0165	H202302765	Non-pregnant	normal	139	85.6	29	3105.03	2806.5	71.4743	8.79626	0.272051	0.610951	Not Detected
KHYF0166	H202302770	Pregnant	normal	155	90.3	29.5	3901.23	3726.06	105.966	2.42326	0.799982	0.619632	Not Detected
KHYF0167	H202302771	Non-pregnant	normal	118	88.4	26.8	3152.84	2989.11	92.172	20.9743	0.494785	0.63566	Not Detected
KHYF0168	H202302772	Pregnant	β0/βN	112	65.52	22.52	3166.65	2561.12	156.958	446.549	0.836422	2.49979	Not Detected
KHYF0169	H202302778	Non-pregnant	normal	155	91	31	3802.55	3523.08	116.051	18.8068	0.821251	0.804602	Not Detected
KHYF0170	H202302779	Non-pregnant	normal	147	88.7	30.1	3520.29	3287.53	104.011	5.64715	0.954576	0.438524	Not Detected
KHYF0171	H202302780	Non-pregnant	normal	144	90.9	30.4	4076.56	3951.48	118.427	9.23818	1.02278	0.688163	Not Detected
KHYF0172	H202302781	Non-pregnant	normal	129	87.3	28.9	3566.91	3421.08	107.107	6.89315	0.887796	0.551367	Not Detected
KHYF0173	H202302783	Non-pregnant	normal	156	92.2	30.5	3879.74	3559.8	97.2933	11.4396	1.12451	0.645509	Not Detected
KHYF0174	H202302786	Non-pregnant	normal	160	89.4	30.4	3536.23	3174.34	100.33	3.20644	2.20685	0.571583	Not Detected
KHYF0175	H202302787	Non-pregnant	normal	135	90.1	30.9	3347.21	3042.76	85.2753	21.2497	0.509964	0.731838	Not Detected
KHYF0176	H202302788	Non-pregnant	normal	137	92.1	29.6	3904.34	3655.34	123.068	30.3777	1.48151	0.704354	Not Detected
KHYF0177	H202302789	Non-pregnant	normal	155	84.4	28.7	3994.19	3694.78	111.825	9.04767	0.964656	0.56126	Not Detected
KHYF0178	H202302791	Non-pregnant	normal	147	87.1	30.1	3612.88	3460.52	105.242	0.001	2.15065	0.540836	Not Detected
KHYF0179	H202302798	Non-pregnant	α3.7/αα	114	74.2	21.8	2418.09	2068.59	50.493	1.55817	0.972888	1.13879	Not Detected
KHYF0180	H202302809	Pregnant	β0/βN	114	64.6	22.1	2417.52	1937.01	152.307	80.31	0.509208	0.86284	Not Detected
KHYF0181	H202302810	Pregnant	normal	128	90.2	31.4	3059.19	2611.78	90.5868	56.5166	0.0949368	0.973544	Not Detected
KHYF0182	H202302811	Pregnant	normal	113	77.6	26.1	2922.31	2522.46	86.1257	9.70088	0.157181	0.559684	Not Detected
KHYF0183	H202302814	Pregnant	normal	143	87.7	30.8	3633.56	2968.54	117.364	51.8161	0.492324	1.10556	Not Detected
KHYF0184	H202302817	Pregnant	normal	140	91.7	31.6	3256.75	2647.38	96.3832	48.553	0.496154	1.23143	Not Detected
KHYF0185	H202303035	Pregnant	normal	122	94	29.8	2459.45	2057.41	63.2086	24.4759	0.0302971	0.617685	Not Detected
KHYF0186	H202303178	Non-pregnant	normal	149	91.8	29.8	2908.33	2385.24	82.8955	9.79524	1.29326	0.689554	Not Detected
KHYF0187	H202303206	Non-pregnant	normal	129	93.3	29.9	2617.49	2027.42	65.0773	4.09373	0.06226	0.403796	Not Detected
KHYF0188	H202303207	Non-pregnant	normal	139	92.1	31.4	3312.48	2635.65	84.1786	29.9801	0.972468	0.889924	Not Detected
KHYF0189	H202303208	Non-pregnant	normal	157	84.9	27.8	2613.45	2190.99	74.2345	10.6109	0.0931896	0.740296	Not Detected
KHYF0190	H202303209	Non-pregnant	normal	143	87.3	29.2	2930.68	2340.42	79.5049	12.5751	0.143212	0.704228	Not Detected
KHYF0191	H202303210	Pregnant	normal	129	89.2	29.7	2974.2	2373	71.0117	17.1367	0.878724	0.733436	Not Detected
KHYF0192	H202303211	Non-pregnant	normal	136	89.9	31.2	2877.24	2238.02	75.152	45.4775	1.33694	0.78588	Not Detected
KHYF0193	H202303212	Non-pregnant	normal	145	88.7	29.7	3151.45	2545.34	72.97	4.57862	0.825082	0.420919	Not Detected
KHYF0194	H202303213	Non-pregnant	normal	117	93.3	30.3	2828.25	2327.54	79.8929	18.0638	0.146874	0.901468	Not Detected
KHYF0195	H202303214	Pregnant	normal	141	92.9	33.3	2957.57	2339	72.832	21.1298	0.0929292	0.865282	Not Detected
KHYF0196	H202303215	Non-pregnant	normal	122	94.9	31.1	2887.45	2286.3	71.6719	24.5709	0.770977	0.74629	Not Detected
KHYF0197	H202303216	Non-pregnant	normal	115	87.5	29.9	3201.75	2506.14	89.6468	39.3977	0.737738	0.769674	Not Detected
KHYF0198	H202303217	Non-pregnant	normal	135	85.7	29.3	3019.76	2314.79	77.4572	35.1708	0.510342	0.895252	Not Detected
KHYF0199	H202303218	Pregnant	normal	128	91.6	30.4	2498.1	2058.53	44.6556	0.001	0.00019509	0.205032	Not Detected
KHYF0200	H202303219	Non-pregnant	normal	127	93.2	31.3	2066.41	1650.56	58.7139	16.7082	0.001	0.397735	Not Detected
KHYF0201	H202303220	Non-pregnant	normal	149	85.1	29.6	2927.54	2330.33	93.4701	5.91055	0.001	0.535368	Not Detected
KHYF0202	H202303221	Pregnant	normal	138	91.9	32	2707.34	2139.21	80.5456	10.7427	0.833188	0.580574	Not Detected
KHYF0203	H202303222	Pregnant	normal	124	86.8	30.5	1967.25	1589.13	55.7299	23.372	0.503328	0.372479	Not Detected
KHYF0204	H202303223	Pregnant	α3.7/αα	116	85.7	28.2	1313.61	1036.32	41.914	0.001	0.0144505	0.506759	Not Detected
KHYF0205	H202303224	Pregnant	normal	153	94.5	32.1	2332.82	1897.44	69.337	22.2159	0.001	0.721855	Not Detected
KHYF0206	H202303225	Non-pregnant	normal	144	84.8	27.9	2506.72	1974.86	74.6037	10.9844	0.0203893	0.303748	Not Detected
KHYF0207	H202303226	Non-pregnant	normal	150	93.4	31.4	2424.51	1936.67	65.6965	2.15227	1.23312	0.166678	Not Detected
KHYF0208	H202303227	Non-pregnant	normal	142	96	32.9	2662.89	2131.43	77.7108	77.688	0.294832	0.977836	Not Detected
KHYF0209	H202303228	Non-pregnant	normal	116	93.1	30.4	2343.28	1773.54	58.2178	76.7028	0.001	1.18874	Not Detected
KHYF0210	H202303229	Non-pregnant	normal	148	79.3	28.1	2205.58	1809.41	43.2867	102	1.54938	1.182	Not Detected
KHYF0211	H202303231	Non-pregnant	normal	147	88.8	30.3	2683.97	2172.8	81.2207	13.1733	2.3987	0.454782	Not Detected
KHYF0212	H202303232	Non-pregnant	normal	142	99.7	33.8	2060.73	1715.4	54.1148	29.7011	0.48431	0.62624	Not Detected
KHYF0213	H202303234	Non-pregnant	α3.7/αα	139	83.6	27.7	2407.43	1943	68.1844	19.9428	0.63819	1.18644	Not Detected
KHYF0214	H202303238	Non-pregnant	normal	142	90.8	31	2677.88	2260.39	84.3129	39.2387	1.11712	1.03711	Not Detected
KHYF0215	H202303240	Pregnant	normal	115	75	23.5	2601.39	2237.2	50.8772	2.20046	0.284852	0.792466	Not Detected
KHYF0216	H202303241	Pregnant	normal	106	71.9	21.9	2178.74	1854.16	49.8962	2.31192	0.138625	0.642853	Not Detected
KHYF0217	H202303242	Pregnant	--SEA/αα	109	76.7	23.5	2392.48	1869.76	47.923	175.723	36.6946	2.54442	Not Detected
KHYF0218	H202303245	Pregnant	normal	140	95.1	32.6	2844.43	2410.29	81.5527	56.6413	0.163766	1.03467	Not Detected
KHYF0219	H202303248	Non-pregnant	normal	133	83.5	26.4	2567.72	2165.9	63.727	12.1846	0.151183	0.721234	Not Detected
KHYF0220	H202303249	Pregnant	normal	117	88.5	27.9	2195.9	1847.29	54.1708	7.73995	0.260308	0.749842	Not Detected
KHYF0221	H202303250	Non-pregnant	normal	148	82.4	27.4	2352.84	1954.39	66.8752	3.24205	0.163666	0.657645	Not Detected
KHYF0222	H202303252	Non-pregnant	normal	153	90.2	30.1	2845.45	2342.5	77.7295	10.5556	0.234898	0.653797	Not Detected
KHYF0223	H202303272	Pregnant	--SEA/αα	110	69.6	21.6	2350.1	2032.04	61.5189	7.06431	36.8911	1.27384	Not Detected
KHYF0224	H202303275	Pregnant	--SEA/αα	112	66.6	21.7	2198.31	1807.51	58.7363	9.68853	29.2606	1.88056	Not Detected
KHYF0225	H202303277	Pregnant	α3.7/αα	139	84.2	27.7	2658.64	2190.28	67.043	2.95041	0.0713647	1.3858	Not Detected
KHYF0226	H202303278	Non-pregnant	α3.7/αα	134	86.4	27.3	2632.04	2219.83	73.0371	1.67818	0.0543085	0.874606	Not Detected
KHYF0227	H202303279	Non-pregnant	normal	130	94.2	31.3	3030.46	2689.6	85.3349	7.70838	0.103278	0.566581	Not Detected
KHYF0228	H202303280	Pregnant	α3.7/αα	125	76.4	24.5	2536.96	1964.38	79.0723	83.8627	0.873096	1.59292	Not Detected
KHYF0229	H202303283	Non-pregnant	βHb E/βN	119	68.4	22.6	3222.1	2761.11	108.375	19.2413	0.796984	0.455263	Detected
KHYF0230	H202303284	Non-pregnant	normal	125	90.9	29.1	2232.75	1865.92	64.0255	2.75954	0.025074	0.459525	Not Detected
KHYF0231	H202303285	Non-pregnant	α3.7/αα	139	81.6	26.4	2993.77	2356.88	70.2359	2.04674	0.734328	0.916268	Not Detected
KHYF0232	H202303288	Pregnant	normal	78	67.1	19.3	1937.99	1573.69	36.6376	2.58006	0.109116	0.705649	Not Detected
KHYF0233	H202303291	Non-pregnant	normal	141	88.6	29.3	2953.24	2486.08	81.8437	11.7082	0.0511686	0.708772	Not Detected
KHYF0234	H202303293	Non-pregnant	βHb E/βN	108	76.2	25.2	2739.99	2233.19	103.265	30.2922	0.0206984	0.533969	Detected
KHYF0235	H202303294	Non-pregnant	α3.7/αα	132	78	25.3	2650.34	2286.36	72.5075	3.5756	0.6027	0.859362	Not Detected
KHYF0236	H202303296	Non-pregnant	βHb E/βN	129	84.4	27.6	3375.32	2674.27	103.683	24.1828	0.206413	0.589203	Detected
KHYF0237	H202303301	Non-pregnant	α3.7/αα	127	82.5	27.4	2452.42	1920.59	55.9052	6.24279	0.0961632	0.959484	Not Detected
KHYF0238	H202303306	Pregnant	normal	118	89.8	30	2710.86	2149.99	71.6235	12.359	0.109956	0.665578	Not Detected
KHYF0239	H202303307	Non-pregnant	normal	144	84.3	28.6	2977.43	2356.27	86.0735	17.3979	1.36046	0.474111	Not Detected
KHYF0240	H202303308	Non-pregnant	normal	99	80.3	25.4	2257.6	1874.08	54.2715	1.76637	0.83869	0.620327	Not Detected
KHYF0241	H202303309	Non-pregnant	normal	117	89.9	30.3	2590.4	2067	67.3936	35.9661	2.24364	0.712709	Not Detected
KHYF0242	H202303313	Non-pregnant	α3.7/αα	99	84.9	26.8	2280.64	1787.45	60.8027	5.34292	0.180172	0.986642	Not Detected
KHYF0243	H202303314	Non-pregnant	βHb E/βN	105	73.9	24.5	2646.71	2226.05	90.5681	10.115	1.08478	0.386968	Detected
KHYF0244	H202303315	Non-pregnant	normal	132	90.8	31.1	2360.97	1847.36	68.7551	9.20685	0.848316	0.534583	Not Detected
KHYF0245	H202303318	Non-pregnant	normal	136	86.1	30.5	2755.68	2347.33	82.53	12.1074	1.07772	0.630169	Not Detected
KHYF0246	H202303327	Pregnant	normal	129	89.3	30	2541.04	2173.55	76.1368	41.0417	0.18569	1.01032	Not Detected
KHYF0247	H202303332	Non-pregnant	normal	132	91.7	30.3	2873.11	2286.36	77.2297	9.40246	3.15336	0.572545	Not Detected
KHYF0248	H202303333	Non-pregnant	normal	138	93.5	30.8	2439.87	1982.44	65.5547	7.68903	0.216493	0.715417	Not Detected
KHYF0249	H202303335	Pregnant	normal	138	89.1	30.1	2266.1	2028.44	66.7111	8.65798	1.37206	0.576593	Not Detected
KHYF0250	H202303336	Pregnant	normal	118	85.7	29	2166.85	1870.75	63.3652	4.82349	0.616022	0.498161	Not Detected
KHYF0251	H202303337	Pregnant	normal	145	90.2	31.5	3070.96	2379.52	76.4463	13.3692	0.0022559	0.554401	Not Detected
KHYF0252	H202303338	Pregnant	normal	118	97.5	32.6	2535.53	2028.1	66.062	38.3247	0.001	0.786546	Not Detected
KHYF0253	H202303339	Pregnant	normal	141	96.5	31.9	2741.54	2276.5	68.1807	10.9942	1.25857	0.779072	Not Detected
KHYF0254	H202303340	Pregnant	normal	157	88.4	31.3	2844.59	2284.8	76.1368	6.27899	0.001	0.638679	Not Detected
KHYF0255	H202303341	Non-pregnant	normal	146	95.5	31.3	2492.13	2008.41	60.5528	30.5285	0.589714	0.782846	Not Detected
KHYF0256	H202303342	Pregnant	normal	136	91.1	31.1	2227.03	1894.07	67.0206	11.3234	0.134837	0.587442	Not Detected
KHYF0257	H202303343	Non-pregnant	normal	162	82.4	29	3072.3	2482.61	91.6573	23.81	0.737268	0.734198	Not Detected
KHYF0258	H202303344	Pregnant	normal	144	93.1	31	2245.83	1893.73	63.2683	0.977091	0.14275	0.421097	Not Detected
KHYF0259	H202303345	Pregnant	normal	139	87.3	29.4	2792.41	2319.11	74.503	3.63471	0.001	0.555318	Not Detected
KHYF0260	H202303346	Pregnant	normal	137	88.7	30.9	2813.17	2296.39	66.6103	11.8553	0.313572	0.532682	Not Detected
KHYF0261	H202303347	Non-pregnant	normal	144	95.1	32	2898.44	2356.91	71.1236	10.4792	0.52164	0.736219	Not Detected
KHYF0262	H202303348	Non-pregnant	normal	144	89.8	30.6	2917.57	2374.87	80.6985	24.197	0.001	0.767898	Not Detected
KHYF0263	H202303349	Pregnant	normal	142	89.3	29.7	2346.92	1975.88	58.5162	10.2379	0.0864444	0.444807	Not Detected
KHYF0264	H202303350	Pregnant	normal	112	97.6	33.4	2446.04	1977.1	69.7137	3.2106	0.688128	0.646656	Not Detected
KHYF0265	H202303353	Non-pregnant	normal	118	88	30	1875.72	1530.82	52.4065	10.2331	0.124219	0.486261	Not Detected
KHYF0266	H202303354	Non-pregnant	normal	124	90.2	30.7	2543.58	2020.65	56.9683	6.64578	0.759049	0.603958	Not Detected
KHYF0267	H202303355	Non-pregnant	normal	143	84.4	28.8	2712.49	2256.14	71.3512	10.7832	0.795589	0.41864	Not Detected
KHYF0268	H202303356	Non-pregnant	α3.7/αα	119	76.9	25.4	2153	1772.15	49.8216	5.83731	0.131317	0.711806	Not Detected
KHYF0269	H202303357	Non-pregnant	normal	142	90.7	30.3	3016.53	2324.65	71.105	54.4904	1.15584	0.75221	Not Detected
KHYF0270	H202303358	Non-pregnant	normal	125	95.1	32.2	2577.08	2073.8	77.3527	7.60772	1.67698	0.616649	Not Detected
KHYF0271	H202303359	Non-pregnant	normal	142	88.8	30.5	2724.34	2214.9	69.8181	5.36773	0.814103	0.570333	Not Detected
KHYF0272	H202303361	Non-pregnant	normal	132	80.8	26.4	2508.89	2077.84	71.9032	8.84932	0.258762	0.584889	Not Detected
KHYF0273	H202303363	Non-pregnant	normal	148	86.4	29.2	3092.9	2386.8	82.668	154.892	1.87396	2.33537	Not Detected
KHYF0274	H202303364	Non-pregnant	normal	135	85.8	28.7	3112.71	2502.74	82.3584	27.8648	0.755656	0.746142	Not Detected
KHYF0275	H202303366	Non-pregnant	normal	137	86.3	28.5	2922.92	2375.68	94.2795	30.5308	1.00615	0.802678	Not Detected
KHYF0276	H202303367	Non-pregnant	normal	136	41	29.3	2646.5	2105.48	76.7186	5.19016	0.115315	0.546113	Not Detected
KHYF0277	H202303368	Non-pregnant	normal	135	81.7	27.4	3037.57	2584.03	78.1845	2.59454	0.850584	0.652835	Not Detected
KHYF0278	H202303369	Non-pregnant	normal	122	82.4	27.9	2538.67	2180.66	70.732	4.44508	0.468485	0.416524	Not Detected
KHYF0279	H202303370	Non-pregnant	normal	139	86	29.4	2700.03	2172.29	66.4649	17.1142	1.59676	0.744218	Not Detected
KHYF0280	H202303371	Non-pregnant	α3.7/αα	104	61.2	19.6	2431.54	1995.26	55.0884	3.28716	0.390827	0.85433	Not Detected
KHYF0281	H202303372	Non-pregnant	normal	142	90.6	30.5	2888.56	2352.09	76.1181	33.8699	1.99702	0.903836	Not Detected
KHYF0282	H202303373	Non-pregnant	normal	141	84.9	29.9	2943.92	2346.68	90.5047	14.7105	0.324887	0.634106	Not Detected
KHYF0283	H202303374	Non-pregnant	normal	134	92.9	31.4	2928.6	2383.54	82.8396	11.946	3.02089	0.546372	Not Detected
KHYF0284	H202303375	Non-pregnant	normal	130	89.6	29.5	2351.53	2001.61	61.8956	0.001	1.32443	0.4882	Not Detected
KHYF0285	H202303376	Non-pregnant	normal	128	81.8	27.8	2511.01	2015.66	73.578	15.5628	1.30914	0.6808	Not Detected
KHYF0286	H202303377	Non-pregnant	normal	132	85.6	30.6	2957.28	2421.24	81.1909	35.3643	0.0156694	0.925444	Not Detected
KHYF0287	H202303378	Non-pregnant	normal	150	91.1	30.5	3139.97	2510.7	89.188	6.80139	2.12705	0.663514	Not Detected
KHYF0288	H202303379	Non-pregnant	βHb E/βN	124	79.2	26.3	3238.48	2552.82	115.984	63.1603	0.490031	0.628771	Detected
KHYF0289	H202303380	Non-pregnant	normal	125	76.1	25.3	2477.42	2061.45	66.3716	8.63732	1.33585	0.419565	Not Detected
KHYF0290	H202303381	Non-pregnant	normal	140	88	29	2658.56	2186	68.5499	9.54538	0.802292	0.600806	Not Detected
KHYF0291	H202303382	Non-pregnant	normal	145	88.9	30.1	2877.69	2357.63	76.5396	27.8874	0.120994	0.969178	Not Detected
KHYF0292	H202303383	Non-pregnant	normal	142	82.8	28	3010.12	2378.71	79.0387	5.38613	0.59477	0.539268	Not Detected
KHYF0293	H202303384	Non-pregnant	normal	136	91.4	32.1	3062.62	2407.03	81.7579	42.6643	0.60732	0.786176	Not Detected
KHYF0294	H202303385	Non-pregnant	normal	130	94.5	31.1	3173.76	2549.73	49.9895	16.6133	0.127579	0.589543	Not Detected
KHYF0295	H202303386	Non-pregnant	normal	142	91.4	30.5	2922.27	2308.33	77.7034	11.0245	0.140364	0.706604	Not Detected
KHYF0296	H202303387	Non-pregnant	normal	117	77	25.7	2500.88	2113.75	51.9626	0.836408	0.17519	0.802382	Not Detected
KHYF0297	H202303389	Non-pregnant	normal	141	82.8	29.4	2980.04	2318.97	83.966	27.3437	0.327466	0.814074	Not Detected
KHYF0298	H202303391	Non-pregnant	normal	140	93	31.3	3008.48	2500.5	99.7775	3.48206	1.29965	0.510208	Not Detected
KHYF0299	H202303392	Non-pregnant	normal	123	88.3	28.2	2353.41	1953.67	66.0993	19.3184	0.91812	0.576852	Not Detected
KHYF0300	H202303393	Non-pregnant	βHb E/βN	139	78.9	27.1	3391.67	2670.02	110.296	82.1724	1.02446	1.0673	Detected
KHYF0301	H202303394	Non-pregnant	normal	142	87.7	30.2	2712.08	2120.21	66.0956	20.6882	0.385392	0.71615	Not Detected
KHYF0302	H202303396	Non-pregnant	normal	143	83.4	27.5	2816.4	2120.14	72.8394	20.128	1.73275	0.627646	Not Detected
KHYF0303	H202303397	Non-pregnant	normal	150	93.4	31.7	2964.39	2437.36	85.8944	22.8189	0.143186	0.796018	Not Detected
KHYF0304	H202303398	Non-pregnant	normal	143	93.6	32.4	2991.4	2547.72	96.7077	13.2837	0.159172	0.855292	Not Detected
KHYF0305	H202303400	Non-pregnant	normal	132	88.8	29.9	3134	2547.28	85.79	0.648102	0.816497	0.499426	Not Detected
KHYF0306	H202303401	Non-pregnant	normal	136	88.6	30	2829.31	2264.16	69.0237	17.1842	0.91686	0.629407	Not Detected
KHYF0307	H202303402	Non-pregnant	normal	137	89.7	29.7	2925.86	2358.44	74.3389	31.1493	0.858144	0.771894	Not Detected
KHYF0308	H202303404	Non-pregnant	normal	139	93.4	32.1	2983.27	2454.36	83.552	35.9364	1.03118	1.01772	Not Detected
KHYF0309	H202303405	Non-pregnant	normal	130	98	32.5	3028.05	2425.19	81.5938	15.2458	1.70268	0.588122	Not Detected
KHYF0310	H202303406	Non-pregnant	normal	140	100.7	33.4	3215.89	2573.53	87.517	10.6075	1.95325	0.685647	Not Detected
KHYF0311	H202303411	Non-pregnant	normal	132	83	28	3272.27	2609.5	84.2682	18.7047	1.46639	0.671365	Not Detected
KHYF0312	H202303412	Non-pregnant	normal	140	85	32	3111.65	2453.3	82.5225	39.952	1.05949	0.776186	Not Detected
KHYF0313	H202303413	Pregnant	normal	126	88	33	2977.43	2404.28	88.9903	20.033	0.0392112	1.17852	Not Detected
KHYF0314	H202303414	Pregnant	normal	128	84.9	28.4	2589.18	2230.57	75.4915	0.001	0.0533988	0.582624	Not Detected
KHYF0315	H202303417	Pregnant	normal	120	85	30	1940.69	1510.59	55.0884	12.3495	0.0625867	0.568527	Not Detected
KHYF0316	H202303419	Pregnant	normal	123	98.7	32.5	2569.15	1942.79	70.0979	29.6145	0.44368	0.708772	Not Detected
KHYF0317	H202303420	Non-pregnant	normal	144	93.3	30.9	2548.11	2196.98	79.8854	36.2545	0.301442	0.690871	Not Detected
KHYF0318	H202303421	Pregnant	normal	128	91.9	40	2822.04	2170.39	74.6187	16.8317	0.110468	0.718836	Not Detected
KHYF0319	H202303422	Non-pregnant	normal	128	89	32.3	3052.69	2369.29	81.7206	7.63348	0.543572	0.597779	Not Detected
KHYF0320	H202303424	Pregnant	normal	125	88	31.2	2786.37	2363.78	75.5101	64.0149	0.0750691	1.51663	Not Detected
KHYF0321	H202303426	Pregnant	normal	128	95.7	32.6	2935.95	2555.34	81.9929	4.98374	0.907536	0.747918	Not Detected
KHYF0322	H202303427	Non-pregnant	normal	123	91.2	31.1	3146.14	2548.81	95.4395	17.475	1.96552	0.634698	Not Detected
KHYF0323	H202303428	Pregnant	normal	137	91.9	29.9	2667.63	2280.24	85.8646	60.5406	1.47378	1.03526	Not Detected
KHYF0324	H202303429	Pregnant	normal	123	93.3	30.3	2622.8	2280.62	70.8737	5.02089	0.976836	0.667539	Not Detected
KHYF0325	H202303430	Pregnant	normal	130	91	31	2267.36	1880.98	53.8687	1.19578	0.0254512	0.567336	Not Detected
KHYF0326	H202303431	Non-pregnant	β0/βN	117	63	19.1	2264.26	1806.39	144.463	119.175	0.360234	0.801124	Not Detected
KHYF0327	H202303432	Pregnant	normal	141	86.7	29.8	2968.93	2641.97	97.8789	16.4732	0.0749162	0.707884	Not Detected
KHYF0328	H202303433	Non-pregnant	normal	126	90	31	2580.35	2247.47	78.1994	11.2128	1.10032	0.530336	Not Detected
KHYF0329	H202303434	Pregnant	normal	120	89.3	31.2	2613.12	2048.6	79.1655	37.6766	1.2857	0.616183	Not Detected
KHYF0330	H202303435	Pregnant	normal	129	89.6	30.3	2768.06	2356.03	83.3842	26.2778	1.10082	0.72227	Not Detected
KHYF0331	H202303436	Non-pregnant	normal	118	89.5	29.3	2659.29	2150.7	80.3927	16.967	1.0542	0.728693	Not Detected
KHYF0332	H202303437	Pregnant	normal	155	97.7	32.9	3044.23	2590.94	94.5182	116.034	1.91402	1.69046	Not Detected
KHYF0333	H202303438	Pregnant	normal	130	89.3	32.3	2530.75	2109.46	78.3897	7.54754	0.531401	0.587331	Not Detected
KHYF0334	H202303439	Non-pregnant	normal	157	89.2	29.2	3053.47	2395.61	43.0964	160.494	1.05143	1.92015	Not Detected
KHYF0335	H202303440	Pregnant	normal	136	93.2	30.7	2758.54	2267.26	78.5986	53.2559	2.19895	0.820216	Not Detected
KHYF0336	H202303441	Pregnant	normal	148	90.7	30	2928.35	2303.33	85.1857	4.41101	0.810692	0.788914	Not Detected
KHYF0337	H202303442	Pregnant	normal	139	90.5	30.9	2756.91	2160.29	74.4657	107.532	0.731892	1.45676	Not Detected
KHYF0338	H202303443	Non-pregnant	normal	151	90.2	29.5	2709.1	2363.17	76.0995	16.2916	1.9315	0.552987	Not Detected
KHYF0339	H202303444	Non-pregnant	normal	130	89.9	31.3	2695.21	2245.53	69.6093	9.94457	0.063273	1.04103	Not Detected
KHYF0340	H202303445	Pregnant	normal	145	89.4	30.2	2563.76	2163.76	67.6547	0.001	1.99198	0.547948	Not Detected
KHYF0341	H202303446	Non-pregnant	normal	156	91.2	33.3	2846.76	2411.69	70.5007	16.8993	0.0525109	0.669767	Not Detected
KHYF0342	H202303448	Non-pregnant	normal	136	90.1	31.2	2441.67	2058.22	71.4556	10.6779	0.578567	0.691441	Not Detected
KHYF0343	H202303449	Pregnant	normal	162	93.2	32	3721.86	3034.91	98.0654	25.2048	0.001	0.635253	Not Detected
KHYF0344	H202303451	Pregnant	normal	142	95.1	31.9	3205.47	2542.08	82.5561	139.876	0.0232067	1.47504	Not Detected
KHYF0345	H202303453	Non-pregnant	normal	131	89.8	30.3	2598.33	2220.34	70.0867	18.5089	1.05479	0.716461	Not Detected
KHYF0346	H202303454	Pregnant	normal	130	90.3	32.8	2474.03	2129.08	63.4734	12.0587	0.565328	0.787804	Not Detected
KHYF0347	H202303456	Pregnant	normal	133	92.4	30.6	2413.36	2092.09	70.9968	15.9889	0.0606547	0.588996	Not Detected
KHYF0348	H202303457	Pregnant	normal	135	95.8	30.1	2452.34	1960.75	63.3056	36.8516	0.481379	0.867502	Not Detected
KHYF0349	H202303458	Pregnant	normal	135	90.3	32.6	3014.41	2540.21	73.2982	12.1917	0.849744	0.67861	Not Detected
KHYF0350	H202303462	Pregnant	normal	135	83.6	30.3	3355.01	2938.69	104.164	13.6244	0.0862092	0.418485	Not Detected
KHYF0351	H202303464	Non-pregnant	--SEA/αα	124	69.1	21.8	2408.7	1922.46	61.4033	45.2425	50.6335	1.82351	Not Detected
KHYF0352	H202303466	Non-pregnant	normal	140	91.1	31.5	3037.45	2396.59	89.7699	15.3099	0.19598	0.619136	Not Detected
KHYF0353	H202303467	Pregnant	normal	109	74	23.3	1945.3	1525.07	48.9488	2.59205	0.165598	0.565005	Not Detected
KHYF0354	H202303468	Non-pregnant	normal	129	93.2	31.6	2195.37	1789.62	69.5197	9.42549	0.001	0.410611	Not Detected
KHYF0355	H202303469	Non-pregnant	normal	132	94	31.9	2737.66	2227.68	74.6037	32.2864	0.352699	0.699418	Not Detected
KHYF0356	H202303471	Non-pregnant	normal	144	86.9	29.4	2200.23	1869.73	63.7905	17.8489	0.107713	0.541791	Not Detected
KHYF0357	H202303472	Non-pregnant	normal	132	79.3	25.8	2505.98	2055.06	68.1508	15.2601	0.121649	0.624982	Not Detected
KHYF0358	H202303475	Non-pregnant	normal	158	95	32.1	2739.83	2133.09	71.5004	66.0957	0.0728255	1.52699	Not Detected
KHYF0359	H202303477	Non-pregnant	normal	141	87.1	29.1	2472.93	2017.83	66.1553	1.67557	0.19719	0.561016	Not Detected
KHYF0360	H202303478	Non-pregnant	normal	128	92.4	30.1	2507.82	2095.73	69.1878	27.4423	0.290858	0.725333	Not Detected
KHYF0361	H202303479	Non-pregnant	normal	99	87.2	27.6	2399.3	1938.54	62.5111	4.14192	0.766735	0.567935	Not Detected
KHYF0362	H202303482	Non-pregnant	normal	139	93.5	32.2	2897.79	2257.5	85.2865	11.5062	1.09402	0.612594	Not Detected
KHYF0363	H202303483	Non-pregnant	normal	127	92	31.6	2732.47	2165.94	77.9383	26.2742	0.646212	0.933436	Not Detected
KHYF0364	H202303484	Non-pregnant	normal	144	92.5	32.2	2797.81	2317.17	70.6611	7.55561	0.107285	0.420631	Not Detected
KHYF0365	H202303485	Non-pregnant	normal	137	92.7	31.3	2740.85	2216.6	87.5618	42.8056	1.15424	0.975764	Not Detected
KHYF0366	H202303486	Non-pregnant	normal	141	97.3	32.4	3297.28	2531.95	78.33	165.278	0.393254	1.62881	Not Detected
KHYF0367	H202303487	Non-pregnant	βHb E/βN	136	81.2	27.4	3364.9	2665.12	104.488	50.4843	0.683684	0.514441	Detected
KHYF0368	H202303545	Non-pregnant	--SEA/αα	136	68.3	21.6	2381.97	1991.21	62.4812	12.0421	34.172	1.35524	Not Detected
KHYF0369	H202303571	Pregnant	normal	125	93.1	31.8	2886.76	2615.65	86.7001	43.4311	1.35962	0.774558	Not Detected
KHYF0370	H202303573	Non-pregnant	normal	149	82	27.1	3692.19	3085.47	124.575	0.922667	0.001	0.200103	Not Detected
KHYF0371	H202303574	Non-pregnant	normal	134	92.1	30.3	2781.14	2173.52	75.152	42.7795	0.901824	1.02934	Not Detected
KHYF0372	H202303575	Pregnant	normal	116	84.6	28.8	2962.23	2582.67	87.4648	11.2238	0.001	0.181219	Not Detected
KHYF0373	H202303576	Pregnant	normal	89	77.3	24.1	2078.83	1741.51	48.7809	5.16452	0.0136105	0.604713	Not Detected
KHYF0374	H202303577	Pregnant	normal	115	93	30.7	2665.67	2206.26	76.2337	7.37922	0.512677	0.593443	Not Detected
KHYF0375	H202303578	Pregnant	normal	144	95.1	32	2598.78	2012.6	71.2654	18.0139	0.889308	0.664764	Not Detected
KHYF0376	H202303579	Pregnant	normal	151	85.6	29	2649.89	2106.57	73.6451	5.80063	0.634931	0.544107	Not Detected
KHYF0377	H202303580	Pregnant	normal	102	93.8	31.4	1993.8	1622.68	54.2454	1.96401	0.372691	0.471091	Not Detected
KHYF0378	H202303581	Pregnant	normal	139	89.6	30.7	2469.46	2003.08	58.5834	5.81606	0.629546	0.663617	Not Detected
KHYF0379	H202303582	Pregnant	normal	150	85.3	29.4	2772.35	2366.6	67.8897	5.32417	0.102253	0.725563	Not Detected
KHYF0380	H202303583	Pregnant	normal	142	85.35	30.7	2690.14	2289.08	64.2343	5.86746	0.198022	0.766418	Not Detected
KHYF0381	H202303589	Pregnant	normal	153	90.9	31	2950.17	2447.93	81.9891	14.9954	0.70639	0.233514	Not Detected
KHYF0382	H202303590	Non-pregnant	βHb E/βN	115	81	26.4	3387.87	2780.86	103.948	29.491	0.11109	0.432752	Detected
KHYF0383	H202303593	Pregnant	normal	126	97.6	33.3	2963.04	2298.33	78.6098	22.2812	0.001	0.944684	Not Detected
KHYF0384	H202303594	Pregnant	α3.7/αα	113	81.3	26.8	2717.23	2185.96	74.5776	5.77582	0.371734	1.07877	Not Detected
KHYF0385	H202303595	Pregnant	normal	124	85.7	30.5	2934.89	2317.2	85.3051	14.1858	0.001	0.810966	Not Detected
KHYF0386	H202303596	Pregnant	normal	119	90.1	31.9	2667.75	2181.27	72.4366	10.786	0.991956	0.599282	Not Detected
KHYF0387	H202303598	Pregnant	normal	106	83.6	26.4	2313.17	1924.6	62.5111	6.70786	0.24213	0.904724	Not Detected
KHYF0388	H202303599	Pregnant	normal	125	91	30.3	2673.92	2286.94	80.3852	37.7395	1.06168	0.973396	Not Detected
KHYF0389	H202303600	Pregnant	normal	129	88.5	29.7	2813.17	2340.59	90.2585	25.3021	0.114408	0.84545	Not Detected
KHYF0390	H202303601	Pregnant	normal	113	89	29.7	2828.82	2338.15	75.8831	8.26983	0.538339	0.919598	Not Detected
KHYF0391	H202303602	Pregnant	normal	143	87.4	28.7	3020.53	2514.44	80.5568	11.9567	0.001	0.89836	Not Detected
KHYF0392	H202303604	Pregnant	normal	91	86.1	27.6	2187.69	1893.09	50.1573	3.29167	0.243004	0.667998	Not Detected
KHYF0393	H202303605	Pregnant	normal	112	80.3	25.1	2201.99	1772.93	68.5052	16.9943	0.106991	0.734731	Not Detected
KHYF0394	H202303606	Pregnant	normal	128	86.6	29.2	2437.26	2045.44	66.4611	15.0725	0.116306	0.680852	Not Detected
KHYF0395	H202303607	Pregnant	normal	140	91	31.6	2620.76	2129.32	76.4725	11.2545	0.105983	0.666074	Not Detected
KHYF0396	H202303609	Pregnant	normal	132	86.4	29.4	2969.87	2379.42	93.8729	31.7178	1.1088	1.12066	Not Detected
KHYF0397	H202303610	Pregnant	normal	140	86.7	28.8	2528.5	2195.89	82.5076	9.79667	0.282668	0.720745	Not Detected
KHYF0398	H202303611	Non-pregnant	normal	144	87.4	28	2973.63	2692.97	76.1778	0.001	0.88998	0.572346	Not Detected
KHYF0399	H202303612	Pregnant	normal	141	87	28.7	3222.55	2723.33	104.839	19.8965	0.549822	0.48265	Not Detected
KHYF0400	H202303614	Pregnant	normal	131	94.1	31.3	2323.34	1994.75	68.949	7.5092	0.364694	0.688385	Not Detected
KHYF0401	H202303615	Pregnant	normal	141	90.4	31.3	2707.42	2318.26	76.9648	13.2552	0.0867804	0.578843	Not Detected
KHYF0402	H202303616	Pregnant	normal	115	88.4	30.3	2564.37	2185.89	79.1991	7.21281	0.0518742	0.616102	Not Detected
KHYF0403	H202303617	Pregnant	normal	128	84.9	29.2	2656.76	2174.84	80.609	6.41918	0.0215628	0.710193	Not Detected
KHYF0404	H202303618	Non-pregnant	normal	124	79.2	23.6	2973.87	2322.23	78.4158	6.95653	0.969192	0.557094	Not Detected
KHYF0405	H202303619	Non-pregnant	normal	136	86.4	28.5	2681.64	2232	72.9252	1.4479	0.437212	0.688962	Not Detected
KHYF0406	H202303623	Pregnant	normal	99	83.6	24.2	2574.55	2206.06	71.2057	41.0583	0.0410936	0.881932	Not Detected
KHYF0407	H202303690	Non-pregnant	normal	139	93.8	29.7	2513.71	2076.75	71.9815	9.69364	1.20926	0.617241	Not Detected
KHYF0408	H202303692	Non-pregnant	normal	144	96.7	30.1	2652.39	2272.49	80.6724	5.93797	0.271438	0.554282	Not Detected
KHYF0409	H202303695	Non-pregnant	βHb E/βN	127	78.2	26.1	3229.53	2639.01	107.7	66.7652	0.0623624	0.773226	Detected
KHYF0410	H202303699	Non-pregnant	normal	109	78	21.3	2137.75	1788.23	52.3767	10.95	0.179844	0.601923	Not Detected
KHYF0411	H202303705	Non-pregnant	normal	87	84	18.7	2849.9	2272.29	73.6377	5.12808	0.0249539	0.741406	Not Detected
KHYF0412	H202303707	Non-pregnant	normal	116	90	30.3	2175.96	1812.27	59.9448	0.001	0.697435	0.609072	Not Detected
KHYF0413	H202303712	Non-pregnant	normal	121	89.4	27.9	2782.61	2323.42	68.591	20.0959	0.687607	0.594997	Not Detected
KHYF0414	H202303713	Non-pregnant	--SEA/αα	114	70.9	20.3	2353.25	1949.15	55.2152	6.41633	32.0813	0.591393	Not Detected
KHYF0415	H202303714	Non-pregnant	--SEA/αα	107	74.2	21.5	2542.47	2198.64	64.9356	28.8299	34.7869	1.89151	Not Detected
KHYF0416	H202303715	Non-pregnant	normal	125	87	36.9	2517.38	1992.26	66.1292	3.95117	0.225313	0.349384	Not Detected
KHYF0417	H202303718	Non-pregnant	β0/βN	125	70.1	22.4	2680.91	2146.05	147.35	61.8949	0.775715	0.734317	Not Detected
KHYF0418	H202303719	Non-pregnant	normal	138	44.4	31.1	3064.62	2534.39	93.1418	45.6366	0.663222	1.15077	Not Detected
KHYF0419	H202303720	Non-pregnant	normal	140	94.6	31.3	2803.45	2360.01	72.3918	3.34865	0.517726	0.641536	Not Detected
KHYF0420	H202303722	Pregnant	normal	158	86.1	28.9	2969.83	2402.81	73.7048	33.3903	0.0340225	0.927442	Not Detected
KHYF0421	H202303724	Pregnant	normal	143	92.2	30	2863.8	2287.08	74.6485	13.8357	0.662768	0.696532	Not Detected
KHYF0422	H202303725	Pregnant	normal	151	89.1	28.8	3128.53	2607.87	91.5864	25.5051	0.150226	0.881044	Not Detected
KHYF0423	H202303726	Pregnant	normal	148	92.8	31.6	3035.61	2583.12	87.9236	58.8348	0.0652109	0.89873	Not Detected
KHYF0424	H202303727	Pregnant	normal	118	91	30	3199.79	2612.22	89.091	24.724	0.001	0.833758	Not Detected
KHYF0425	H202303728	Non-pregnant	normal	156	94.5	31.8	3240.24	2662.4	85.4879	24.8119	0.360335	1.03489	Not Detected
KHYF0426	H202303729	Non-pregnant	normal	140	86.2	28.4	2905.68	2304.89	78.7664	6.88282	0.857388	0.77145	Not Detected
KHYF0427	H202303730	Pregnant	normal	113	92.8	30.1	2765.9	2303.67	74.0069	11.4123	0.563195	0.794612	Not Detected
KHYF0428	H202303732	Non-pregnant	normal	130	88.9	29.3	2517.92	2151.32	66.7782	12.6605	0.126664	0.816812	Not Detected
KHYF0429	H202303733	Non-pregnant	normal	120	89	29	2906.33	2464.39	74.3277	1.83107	0.239627	0.612217	Not Detected
KHYF0430	H202303734	Non-pregnant	normal	140	88	30	2681.19	2238.8	76.5545	1.50571	0.690413	0.569156	Not Detected
KHYF0431	H202303735	Non-pregnant	normal	147	90.9	29.8	3398.16	2767.77	74.4471	2.42077	0.862848	0.437532	Not Detected
KHYF0432	H202303736	Non-pregnant	normal	135	89.3	31	3783.76	3203.48	99.6507	111.811	0.001	1.0912	Not Detected
KHYF0433	H202303738	Non-pregnant	α3.7/αα	135	90	30	3239.5	2631.57	89.1619	18.154	0.0296419	1.36715	Not Detected
KHYF0434	H202303739	Non-pregnant	normal	132	93.9	29.9	2879.12	2364.02	70.0569	16.5052	0.736907	0.650638	Not Detected
KHYF0435	H202303740	Non-pregnant	normal	141	90.3	29.1	2931.58	2402.71	77.8526	12.8754	0.0779839	0.612942	Not Detected
KHYF0436	H202303741	Non-pregnant	normal	151	91.8	30.3	2979.02	2502.74	78.7664	56.138	1.71091	1.03356	Not Detected
KHYF0437	H202303742	Non-pregnant	normal	157	90.6	29.4	2747.14	2228.29	73.5556	0.001	0.78902	0.474096	Not Detected
KHYF0438	H202303743	Non-pregnant	normal	150	87.7	29.4	2945.68	2533.61	85.7415	18.846	1.40431	0.658297	Not Detected
KHYF0439	H202303744	Non-pregnant	normal	161	93.1	31.6	3231.9	2652.1	79.6765	24.9033	0.130108	0.794834	Not Detected
KHYF0440	H202303745	Non-pregnant	normal	144	81.7	26.8	3037.04	2514.06	73.4101	21.1974	0.599936	0.780848	Not Detected
KHYF0441	H202303746	Non-pregnant	normal	151	94.8	33	3034.14	2397.17	78.013	7.01921	0.001	0.502549	Not Detected
KHYF0442	H202303747	Non-pregnant	normal	149	87.3	28.6	2913.97	2217.99	79.1693	13.7668	0.553921	0.522566	Not Detected
KHYF0443	H202303748	Non-pregnant	normal	141	83.8	29.6	3246.41	2676.65	90.2473	4.65719	0.821444	0.509534	Not Detected
KHYF0444	H202303749	Non-pregnant	normal	158	93.21	30.8	3410.3	2802.11	88.5987	8.33416	1.20784	0.746216	Not Detected
KHYF0445	H202303750	Pregnant	normal	125	90.2	29.8	2733.29	2200.41	80.2771	71.7945	0.001	0.969992	Not Detected
KHYF0446	H202303751	Non-pregnant	normal	136	96.8	31.7	2652.39	2141.73	72.1867	18.4199	0.0206153	0.705923	Not Detected
KHYF0447	H202303752	Pregnant	normal	137	100.25	31.9	3374.14	2483.7	94.4548	102.63	0.0681979	1.4507	Not Detected
KHYF0448	H202303753	Non-pregnant	normal	147	90.7	30.2	2940.69	2394.82	74.1226	45.309	0.893928	1.37514	Not Detected
KHYF0449	H202303754	Non-pregnant	normal	149	92.4	30.7	2788.9	2308.91	78.7589	43.4691	0.197778	0.711429	Not Detected
KHYF0450	H202303756	Non-pregnant	normal	148	89.9	29	3273.29	2694.74	85.652	19.9808	0.0916944	0.702097	Not Detected
KHYF0451	H202303757	Pregnant	normal	159	86.4	28.8	3251.8	2675.63	92.9777	14.3045	0.879816	0.712635	Not Detected
KHYF0452	H202303758	Non-pregnant	normal	145	87.1	28.9	2856.03	2360.79	83.4326	16.9967	0.0616694	0.613282	Not Detected
KHYF0453	H202303759	Pregnant	normal	146	86.2	28.5	2821.96	2306.05	85.1223	84.2509	1.53401	1.4595	Not Detected
KHYF0454	H202303761	Non-pregnant	normal	136	96.6	33.4	3587.3	2968.74	98.6771	14.4232	0.185136	0.913382	Not Detected
KHYF0455	H202303762	Non-pregnant	normal	141	88.2	28.7	2639.02	2262.67	74.5963	1.57859	0.145942	0.570673	Not Detected
KHYF0456	H202303763	Non-pregnant	normal	117	78.8	24.1	2418.46	1973.05	51.2017	3.25428	0.266876	0.575498	Not Detected
KHYF0457	H202303764	Non-pregnant	normal	146	92.7	30.4	3090.45	2574.14	97.0695	29.6584	0.00097818	0.50172	Not Detected
KHYF0458	H202303767	Non-pregnant	normal	130	91.5	31.2	3141.4	2537.18	81.135	16.9753	0.932316	0.834646	Not Detected
KHYF0459	H202303770	Non-pregnant	normal	125	90.5	30.6	2944.86	2498.49	89.1843	23.0254	1.24463	0.79661	Not Detected
KHYF0460	H202303771	Non-pregnant	normal	122	92.4	31.2	3131.47	2562.58	82.9291	3.2455	0.655544	1.02364	Not Detected
KHYF0461	H202303772	Pregnant	normal	130	69.7	22.3	2949.32	2468.98	92.7353	27.9788	1.18364	0.97162	Not Detected
KHYF0462	H202303773	Pregnant	normal	135	76.3	22.3	2765.24	2379.59	73.5258	16.9504	0.0676158	0.74074	Not Detected
KHYF0463	H202303774	Non-pregnant	normal	134	76.3	23.5	2623.46	2214.35	64.9617	3.06139	0.207446	0.814222	Not Detected
KHYF0464	H202303775	Non-pregnant	normal	134	90.7	39.1	3250.94	2626.53	82.765	31.4555	0.827341	0.917748	Not Detected
KHYF0465	H202303777	Non-pregnant	normal	143	90.2	32.3	2672.12	2223.77	90.4115	26.5271	0.380075	0.755392	Not Detected
KHYF0466	H202303778	Pregnant	normal	136	84.3	28.3	2652.96	2208.67	86.4316	89.8678	0.665666	1.58686	Not Detected
KHYF0467	H202303779	Non-pregnant	normal	309	96.7	33.3	2745.59	2287.76	78.2181	1.7132	0.325072	0.594849	Not Detected
KHYF0468	H202303780	Non-pregnant	normal	152	89.4	33.4	2597.72	2163.86	67.0841	25.2	0.0441731	0.6886	Not Detected
KHYF0469	H202303781	Non-pregnant	normal	157	91.3	32.1	3453.45	3114.5	101.411	14.2701	0.0547226	0.895326	Not Detected
KHYF0470	H202303784	Non-pregnant	normal	154	42	38	3005.29	2563.6	79.1096	2.24414	0.158995	0.524904	Not Detected
KHYF0471	H202303785	Non-pregnant	normal	150	38.9	29.8	3187.16	2629.36	74.3053	6.8808	0.478582	0.748954	Not Detected
KHYF0472	H202303786	Non-pregnant	normal	111	85.5	26.3	2674.12	2195.72	79.7288	18.2121	0.0627236	0.617974	Not Detected
KHYF0473	H202303788	Non-pregnant	normal	146	86.4	31.4	2774.93	2244.88	76.0883	6.25312	0.284206	0.50784	Not Detected
KHYF0474	H202303790	Pregnant	normal	144	73.4	31.6	3043.01	2432.29	84.8761	15.9663	0.80283	0.734287	Not Detected
KHYF0475	H202303792	Non-pregnant	normal	143	78.4	31.4	2762.46	2242.44	73.7794	74.9709	1.13366	1.10556	Not Detected
KHYF0476	H202303793	Pregnant	normal	123	88.3	28.8	2762.05	2391.8	73.6899	4.08292	0.0472416	0.668975	Not Detected
KHYF0477	H202303794	Non-pregnant	normal	118	88.3	25.1	3420.76	2734.82	93.6752	22.0533	0.126025	0.611721	Not Detected
KHYF0478	H202303795	Pregnant	normal	146	90.1	27.3	3712.7	3027.9	105.261	6.48411	0.915852	0.700343	Not Detected
KHYF0479	H202303796	Non-pregnant	normal	125	76.6	24.5	2839.73	2397.37	92.5674	46.5909	0.024019	0.820142	Not Detected
KHYF0480	H202303797	Non-pregnant	normal	134	96.7	29.1	3026.26	2469.35	78.1099	25.8457	0.675377	0.735553	Not Detected
KHYF0481	H202303799	Non-pregnant	normal	130	76.1	24.5	3461.45	2756.79	95.2866	37.4142	0.830844	1.09994	Not Detected
KHYF0482	H202303800	Pregnant	normal	141	89.2	31.6	2507.41	1960.47	80.389	14.5681	1.1503	0.273363	Not Detected
KHYF0483	H202303805	Pregnant	normal	148	94.1	31.4	2469.74	1991.62	70.8439	121.193	1.18919	1.65716	Not Detected
KHYF0484	H202303806	Pregnant	α3.7/αα	123	82.9	26.3	2521.67	2034.63	65.9054	3.10353	0.0160751	0.820438	Not Detected
KHYF0485	H202303807	Non-pregnant	normal	120	91	37.6	2614.43	2170.05	72.5	9.6058	0.0209026	0.659932	Not Detected
KHYF0486	H202303808	Non-pregnant	normal	114	90.5	29.4	2530.54	2102.36	63.8539	25.9977	0.0483974	1.53942	Not Detected
KHYF0487	H202303809	Pregnant	normal	131	96.2	32.8	2819.5	2238.87	70.1949	102.421	1.11695	1.81204	Not Detected
KHYF0488	H202303811	Non-pregnant	normal	131	91.7	30.1	2865.1	2388.57	87.3268	0.151236	0.480228	0.582639	Not Detected
KHYF0489	H202303812	Non-pregnant	normal	135	83.5	27.8	3246.08	2865.04	105.149	37.8095	0.150923	1.14611	Not Detected
KHYF0490	H202303814	Non-pregnant	normal	138	89.9	40.8	2569.85	2125.78	71.3959	8.49144	0.1796	0.720338	Not Detected
KHYF0491	H202303815	Non-pregnant	normal	122	84.7	37.7	2127.7	1757.73	56.752	32.1119	1.42111	1.30025	Not Detected
KHYF0492	H202303816	Non-pregnant	normal	131	92.3	29.5	2570.42	2122.55	73.6004	42.2204	0.0946428	0.771376	Not Detected
KHYF0493	H202303820	Pregnant	normal	118	97.5	32.6	2106.74	1686.2	60.3141	16.4767	0.41428	0.698516	Not Detected
KHYF0494	H202303823	Non-pregnant	normal	135	86.9	28.9	2916.79	2441.06	62.6155	0.001	0.0171293	0.495141	Not Detected
KHYF0495	H202303825	Non-pregnant	β0/βN	110	65.1	20.2	2497.69	1910.77	133.452	110.709	0.001	0.709327	Not Detected
KHYF0496	H202303828	Pregnant	βHb E/βN	110	89	29	3178.7	2451.98	109.945	191.095	0.136408	1.65723	Detected
KHYF0497	H202303829	Non-pregnant	normal	124	77.7	24	3062.33	2576.45	78.3114	10.9108	0.186522	0.567232	Not Detected
KHYF0498	H202303832	Non-pregnant	normal	143	90.5	30.9	2932.73	2420.43	75.0028	9.7023	0.759268	0.58998	Not Detected
KHYF0499	H202303834	Non-pregnant	normal	143	90.5	30.9	3154.19	2522.49	89.9676	71.1844	0.740342	1.10149	Not Detected
KHYF0500	H202303835	Non-pregnant	α3.7/αα	135	82.6	26.1	2583.29	2079.13	64.3238	1.00967	0.0327323	0.98272	Not Detected
KHYF0501	H202303837	Non-pregnant	normal	138	77.2	24.6	2565.4	2179.54	72.1941	6.29763	0.0263138	0.554948	Not Detected
KHYF0502	H202303840	Non-pregnant	normal	100	78	23.9	2025.51	1681.67	44.0289	0.001	0.142187	0.919524	Not Detected
KHYF0503	H202303841	Pregnant	normal	121	95.2	30.5	2677.64	2221.08	71.9965	7.75764	0.942228	0.817034	Not Detected
KHYF0504	H202303844	Pregnant	normal	137	90.3	30.2	2770.43	2233.22	80.3144	3.58189	1.1723	0.692203	Not Detected
KHYF0505	H202303846	Pregnant	normal	121	88.7	29.7	2840.18	2337.36	56.502	19.3161	0.962556	0.65544	Not Detected
KHYF0506	H202303847	Pregnant	normal	126	84.3	28.2	3179.64	2651.22	92.698	45.8882	0.656032	0.746586	Not Detected
KHYF0507	H202303848	Pregnant	normal	144	83.2	29.6	3384.56	2714.87	97.8901	49.1537	1.26	0.981018	Not Detected
KHYF0508	H202303849	Pregnant	normal	141	96.4	32	3219.4	2697.12	89.4491	50.6671	0.803888	1.0394	Not Detected
KHYF0509	H202303850	Pregnant	normal	143	86.1	34.3	3260.38	2774.33	89.7401	40.4921	0.848064	0.65211	Not Detected
KHYF0510	H202303851	Pregnant	normal	146	90.6	43.5	2811.82	2187.49	73.9584	10.9346	0.470299	0.059314	Not Detected
KHYF0511	H202303858	Pregnant	normal	89	69.5	19.5	2022.69	1805.13	43.1449	0.457826	0.001	0.143375	Not Detected
KHYF0512	H202303872	Pregnant	normal	108	81.1	25.2	2544.11	1898.08	56.267	10.2201	0.386417	0.01	Not Detected
KHYF0513	H202303876	Non-pregnant	normal	120	91.7	31.1	2884.14	2105.76	74.1897	10.8789	0.122338	0.333259	Not Detected
KHYF0514	H202303877	Non-pregnant	normal	127	93.6	38.3	3093.39	2337.87	81.7877	24.9828	0.629882	0.169682	Not Detected
KHYF0515	H202303878	Non-pregnant	normal	111	92.7	32.5	2938.49	2232.54	74.6112	27.7093	1.21699	0.447737	Not Detected
KHYF0516	H202303883	Non-pregnant	normal	126	89.2	29.6	2926.43	2399.18	78.7515	4.54823	0.86646	0.632345	Not Detected
KHYF0517	H202303884	Non-pregnant	normal	129	91.3	31	2858.4	2195.96	78.1248	6.90537	0.001	0.620904	Not Detected
KHYF0518	H202303889	Non-pregnant	normal	128	85	29	2550.77	1980.36	68.2068	4.90231	1.06218	0.01	Not Detected
KHYF0519	H202303890	Non-pregnant	normal	137	91.9	29.3	3339.04	2701.74	46.5467	71.5037	0.923496	1.06286	Not Detected
KHYF0520	H202303894	Non-pregnant	α3.7/αα	121	77.3	23.7	3278.89	2709.19	92.5226	4.24578	0.448224	0.576349	Not Detected
KHYF0521	H202303897	Non-pregnant	--SEA/αα	104	64	20.6	2434.15	2018.55	65.0064	12.3389	26.6288	1.63614	Not Detected
KHYF0522	H202303900	Non-pregnant	normal	108	90.6	29.9	2568.5	2141.93	63.9695	0.819991	0.276486	0.0671779	Not Detected
KHYF0523	H202303901	Non-pregnant	normal	141	90.2	29.9	3552.37	2303.87	76.3233	302.685	3.23047	1.48548	Not Detected
KHYF0524	H202303932	Non-pregnant	normal	108	66.5	20.5	2638.29	2246.18	57.1697	2.70767	0.001	0.189174	Not Detected
KHYF0525	H202303992	Pregnant	normal	119	94.8	30.9	2828.17	2438.65	89.0127	8.82404	0.760477	0.443452	Not Detected
KHYF0526	H202304009	Pregnant	normal	120	96.2	31.7	2865.96	2371.16	74.268	1.84792	0.178198	0.208687	Not Detected
KHYF0527	H202304013	Pregnant	normal	106	88.1	29.4	2826.16	2379.25	83.0447	2.4083	0.733874	0.423006	Not Detected
KHYF0528	H202304018	Pregnant	normal	112	88.9	31	2774.68	2171.1	77.4348	13.8582	0.001	0.206823	Not Detected
KHYF0529	H202304024	Non-pregnant	normal	112	88.9	28.2	2417.6	2012.22	64.0739	2.95717	1.39608	0.582521	Not Detected
KHYF0530	H202304026	Non-pregnant	normal	123	90.8	27.6	2526.41	2047.58	71.5862	2.24616	0.139247	0.519576	Not Detected
KHYF0531	H202304035	Non-pregnant	normal	131	76	23.8	2540.14	2139.96	68.6991	0.990278	0.218568	0.791652	Not Detected
KHYF0532	H202304041	Non-pregnant	--SEA/αα	135	67.4	21.3	2809.82	2398.77	75.1632	13.0748	43.3196	1.43516	Not Detected
KHYF0533	H202304048	Non-pregnant	normal	120	80.8	24	2567.11	2094.74	71.2691	6.51817	0.5534	0.610892	Not Detected
KHYF0534	H202304049	Non-pregnant	β0/βN	123	63.8	20	2688.38	2157.13	138.368	22.2005	0.322594	0.48066	Not Detected
KHYF0535	H202304061	Non-pregnant	normal	143	91.9	28.9	2755.52	2295.75	72.1121	2.75764	1.37348	0.536914	Not Detected
KHYF0536	H202304064	Non-pregnant	--SEA/αα	122	68.8	20.8	2847.7	2385.88	80.8552	33.3547	60.6144	1.54963	Not Detected
KHYF0537	H202304077	Non-pregnant	normal	152	88.8	28.4	2595.79	2147.61	74.4545	3.35743	0.203902	0.684396	Not Detected
KHYF0538	H202304088	Non-pregnant	normal	142	88	30.2	2403.92	1823.42	72.7872	14.5016	1.61011	0.530343	Not Detected
KHYF0539	H202304089	Non-pregnant	normal	159	86.8	29.7	2446.53	1893.73	64.8535	2.706	0.792935	0.472697	Not Detected
KHYF0540	H202304090	Pregnant	βHb E/βN	121	75.3	25.2	2505.86	2110.55	73.9025	19.5345	0.147739	0.478144	Detected
KHYF0541	H202304092	Non-pregnant	βHb E/βN	113	76.3	24.6	2389.98	1928.89	70.8327	17.9771	0.104689	0.327916	Detected
KHYF0542	H202304094	Non-pregnant	normal	130	88.6	28.4	2484.74	1901.65	62.4104	32.5048	0.353539	0.759388	Not Detected
KHYF0543	H202304099	Pregnant	normal	125	94.6	30.6	2801.61	2261.37	80.0943	17.1818	0.0899976	0.359174	Not Detected
KHYF0544	H202304102	Pregnant	normal	134	102.8	31.5	2995.94	2516.41	91.1052	50.3787	0.001	0.611173	Not Detected
KHYF0545	H202304135	Pregnant	normal	135	88.5	29.4	2603.84	2308.87	81.7728	37.5163	0.001	0.819476	Not Detected
KHYF0546	H202304150	Non-pregnant	normal	133	98.1	31.8	2425.74	1880.23	68.3784	14.466	0.611654	0.312339	Not Detected
KHYF0547	H202304151	Pregnant	normal	117	81.9	26.8	3094.29	2626.02	83.9772	5.39373	0.235729	0.171806	Not Detected
KHYF0548	H202304153	Non-pregnant	normal	145	90.4	28.5	2596.37	2138.23	73.0707	15.025	1.15744	0.284182	Not Detected
KHYF0549	H202304154	Non-pregnant	normal	139	90.1	29.3	2544.31	2025.24	80.7209	1.14627	0.001	0.210212	Not Detected
KHYF0550	H202304155	Non-pregnant	normal	85	65.12	18.32	1421.48	1180.34	31.5793	1.68732	0.001	0.400814	Not Detected
KHYF0551	H202304156	Non-pregnant	normal	137	94.6	30.7	4232.69	3229.66	94.6562	10.6623	1.24001	0.319584	Not Detected
KHYF0552	H202304158	Pregnant	normal	126	94	29.6	3969.18	3079.99	76.2636	35.1744	0.397001	0.563702	Not Detected
KHYF0553	H202304162	Non-pregnant	normal	138	99.5	33.1	4233.1	3333.29	97.9834	61.1269	1.93813	0.611891	Not Detected
KHYF0554	H202304163	Non-pregnant	normal	136	93	30	5031.91	3961.34	121.814	77.4814	0.258098	0.675775	Not Detected
KHYF0555	H202304164	Non-pregnant	normal	137	91.2	28.7	2568.42	2269.94	86.577	9.62158	0.630252	0.40054	Not Detected
KHYF0556	H202304165	Non-pregnant	normal	145	88	28.4	4907.29	3576.8	104.485	16.9432	2.17678	0.343079	Not Detected
KHYF0557	H202304166	Non-pregnant	normal	154	94.1	31.1	2728.75	2293.23	63.3242	4.41006	0.843444	0.234573	Not Detected
KHYF0558	H202304167	Non-pregnant	normal	148	86.8	28.4	2144.21	1811.89	49.9596	3.15588	0.03938	0.227439	Not Detected
KHYF0559	H202304168	Non-pregnant	normal	142	93.5	28.6	4585.31	3587	104.265	37.3858	1.73737	0.412498	Not Detected
KHYF0560	H202304169	Non-pregnant	normal	154	83.8	29.6	2505.66	1955.41	65.7785	13.6363	0.760276	0.247656	Not Detected
KHYF0561	H202304170	Non-pregnant	normal	149	90.8	29.7	4153.42	3134.9	91.329	8.15778	0.8505	0.400828	Not Detected
KHYF0562	H202304171	Non-pregnant	normal	145	89.9	29.8	2226.18	1812	55.5024	6.64874	0.432247	0.391652	Not Detected
KHYF0563	H202304172	Non-pregnant	normal	141	94	28.1	4409.2	3196.75	90.8777	29.3949	0.235519	0.519465	Not Detected
KHYF0564	H202304173	Non-pregnant	normal	128	96.5	30.1	3924.6	2923.39	72.403	217.601	1.07495	1.66848	Not Detected
KHYF0565	H202304174	Non-pregnant	normal	145	95	31.5	2014.32	1661.07	53.201	17.4287	0.001	0.284182	Not Detected
KHYF0566	H202304175	Pregnant	normal	146	93.2	30	4639.24	3575.78	98.6063	5.78544	0.603355	0.391016	Not Detected
KHYF0567	H202304176	Non-pregnant	normal	126	88.5	27.9	2203.46	1772.69	68.0165	24.1804	0.0393028	0.539438	Not Detected
KHYF0568	H202304177	Non-pregnant	normal	143	87	29.4	1881.07	1581.1	55.6926	1.23697	0.001	0.122744	Not Detected
KHYF0569	H202304178	Non-pregnant	normal	139	88.7	30.7	4731.18	3561.5	98.9942	18.7	0.249581	0.575498	Not Detected
KHYF0570	H202304179	Non-pregnant	normal	135	95	30.9	2183.35	1753.41	68.6022	2.10325	1.60154	0.207881	Not Detected
KHYF0571	H202304180	Non-pregnant	normal	137	90.4	31.2	4810.86	3554.7	102.646	27.3354	1.36172	0.551293	Not Detected
KHYF0572	H202304181	Non-pregnant	normal	136	98.4	30.8	4515.85	3481.94	99.7066	7.28248	0.883848	0.485188	Not Detected
KHYF0573	H202304182	Non-pregnant	normal	143	86.6	27.7	2205.3	1650.19	57.8523	15.361	1.64934	0.26472	Not Detected
KHYF0574	H202304183	Non-pregnant	normal	143	89.7	29.4	4575.5	3329.28	99.688	67.9083	0.958776	0.726177	Not Detected
KHYF0575	H202304184	Non-pregnant	normal	151	84.8	29	2423.98	1892	71.8734	12.4041	0.109948	0.21443	Not Detected
KHYF0576	H202304185	Non-pregnant	normal	144	94.8	29.8	4676.02	3349.2	98.0207	20.0912	0.253789	0.398238	Not Detected
KHYF0577	H202304186	Non-pregnant	normal	142	94.5	30	4992.27	3768.56	114.119	22.3916	0.566798	0.326777	Not Detected
KHYF0578	H202304187	Non-pregnant	α3.7/αα	150	90.6	30.9	4758.56	3384.36	94.5331	19.544	1.99576	1.04917	Not Detected
KHYF0579	H202304188	Non-pregnant	normal	158	98.4	32.3	5339.58	3944.34	135.231	33.5375	1.09049	0.749472	Not Detected
KHYF0580	H202304189	Non-pregnant	normal	142	92	29.8	2512.44	2024.46	69.3929	4.55048	0.001	0.298309	Not Detected
KHYF0581	H202304190	Non-pregnant	normal	160	91.1	29.1	5547.97	4631.82	122.613	16.0981	0.631285	0.671165	Not Detected
KHYF0582	H202304191	Non-pregnant	normal	151	88.5	28	2356.72	2015.86	64.2642	8.39933	1.1702	0.437865	Not Detected
KHYF0583	H202304192	Non-pregnant	normal	150	92.9	30.4	5123.84	3834.86	94.0855	64.3568	0.292782	0.972286	Not Detected
KHYF0584	H202304193	Pregnant	normal	144	89	29	3763.9	3116.54	95.3276	15.3301	1.49948	0.405757	Not Detected
KHYF0585	H202304194	Non-pregnant	normal	163	90.8	30.6	4684.6	3306.16	92.2727	26.1033	0.299124	0.420697	Not Detected
KHYF0586	H202304196	Non-pregnant	normal	134	90.3	30.3	4792.88	3488.06	97.8081	23.9299	0.552216	0.382432	Not Detected
KHYF0587	H202304197	Non-pregnant	normal	131	91.8	28.4	4175.89	2956.44	86.0772	2.94744	0.833784	0.27047	Not Detected
KHYF0588	H202304198	Non-pregnant	normal	135	82.9	26.5	4636.79	3472.76	74.3165	33.6681	0.424452	0.699714	Not Detected
KHYF0589	H202304199	Non-pregnant	normal	134	84	27.3	4262.92	3145.44	84.9209	10.4255	0.356513	0.390801	Not Detected
KHYF0590	H202304200	Pregnant	normal	149	86	29	3843.78	3009.34	84.339	2.64214	0.217594	0.227772	Not Detected
KHYF0591	H202304201	Non-pregnant	normal	119	79.1	24.6	3758.38	2679.57	85.458	16.8958	0.225985	0.487231	Not Detected
KHYF0592	H202304203	Pregnant	normal	125	92	30.7	2135.14	1680.38	61.2317	9.16257	0.505982	0.450179	Not Detected
KHYF0593	H202304231	Non-pregnant	normal	107	68.5	20.3	2661.82	2084.98	79.0685	9.89353	0.283256	0.452991	Not Detected
KHYF0594	H202304239	Non-pregnant	normal	125	96.4	30.3	2668.16	2089.74	73.3467	4.7753	0.229135	0.516372	Not Detected
KHYF0595	H202304249	Non-pregnant	normal	102	73.6	21.1	2015.66	1560.74	36.3511	0.001	0.210622	0.385274	Not Detected
KHYF0596	H202304253	Non-pregnant	normal	125	85.2	27.5	2477.75	1684.39	71.5824	470.194	0.455154	2.77448	Not Detected
KHYF0597	H202304255	Non-pregnant	normal	125	90.5	29.6	2208.97	1753.72	75.1632	4.26881	1.20926	0.328745	Not Detected
KHYF0598	H202304260	Non-pregnant	normal	129	96.3	31.7	2588.44	2106.91	72.9215	0.001	0.116726	0.452081	Not Detected
KHYF0599	H202304274	Non-pregnant	normal	135	91.8	29.8	2459.81	1858.85	63.3914	2.8234	1.48193	0.310326	Not Detected
KHYF0600	H202304349	Non-pregnant	normal	136	90	30.2	2755.88	2208.13	74.1412	12.0587	1.20355	0.323336	Not Detected
KHYF0601	H202304350	Pregnant	normal	92	69.4	21	1527.22	1246.3	31.7367	0.001	0.001	0.114596	Not Detected
KHYF0602	H202304351	Non-pregnant	normal	122	88.5	31.2	2672.45	2147.27	76.3829	7.10241	0.928284	0.246901	Not Detected
KHYF0603	H202304353	Pregnant	normal	130	92.7	31.6	2784.65	2208.23	72.224	47.296	1.02379	0.7365	Not Detected
KHYF0604	H202304385	Pregnant	normal	143	85.6	33	3211.27	2828.7	97.9498	14.225	0.00707204	0.44824	Not Detected
KHYF0605	H202304393	Pregnant	normal	111	92.1	31.4	2563.07	2236.66	65.1519	4.70384	0.00827182	0.200851	Not Detected
KHYF0606	H202304398	Non-pregnant	normal	112	71.6	19.7	2836.38	2297.55	71.0229	11.7566	0.431508	0.802752	Not Detected
KHYF0607	H202304402	Non-pregnant	α3.7/αα	117	64.3	19.8	2152.55	1600.01	47.8447	9.44033	0.180676	0.478121	Not Detected
KHYF0608	H202304403	Non-pregnant	normal	156	91.9	31.3	2301.11	1793.06	69.2101	3.27802	0.201541	0.269856	Not Detected
KHYF0609	H202304408	Pregnant	normal	123	80.2	25.6	3259.57	2717.52	74.9581	21.709	0.001	0.716379	Not Detected
KHYF0610	H202304410	Non-pregnant	normal	139	91.9	28.3	2326.24	1843.11	64.6111	0.797973	0.001	0.0456795	Not Detected
KHYF0611	H202304412	Non-pregnant	normal	139	92.5	30.8	2566.62	1969.08	70.6089	11.7899	0.153384	0.192193	Not Detected
KHYF0612	H202304435	Pregnant	normal	147	89	30.6	4068.43	3167.85	115.279	38.5621	0.688019	0.519362	Not Detected
KHYF0613	H202304442	Pregnant	normal	129	85.6	29.5	2854.36	2166.21	83.4849	3.94927	1.05	0.306271	Not Detected
KHYF0614	H202304446	Non-pregnant	normal	141	90	29.4	2874.83	2239.51	71.8846	11.1871	0.229026	0.273711	Not Detected
KHYF0615	H202304447	Non-pregnant	normal	137	92.7	30.4	2566.54	2041.7	64.0702	12.2558	0.369214	0.448714	Not Detected
KHYF0616	H202304454	Non-pregnant	normal	145	87.2	29.8	2835.68	2327.27	76.5172	8.35767	0.170612	0.556695	Not Detected
KHYF0617	H202304462	Pregnant	normal	125	93.9	30.7	2453.07	1988.52	59.4525	37.7324	0.001	0.478151	Not Detected
KHYF0618	H202304465	Pregnant	normal	183	81.7	27.5	2809.21	2380.27	81.37	19.4359	0.685348	0.483649	Not Detected
KHYF0619	H202304482	Pregnant	normal	148	85.4	29.7	2825.63	2421.99	88.3637	36.2878	1.72729	0.845524	Not Detected
KHYF0620	H202304493	Pregnant	normal	115	74.9	22.1	2268.79	1919.3	51.2651	0.001	0.174409	0.38019	Not Detected
KHYF0621	H202304499	Non-pregnant	normal	129	92.7	30.1	2556.98	2097.73	64.3015	4.15604	0.668707	0.223532	Not Detected
KHYF0622	H202304513	Non-pregnant	normal	135	91.6	30.6	3267.62	2571.79	100.206	7.56665	0.299233	0.240056	Not Detected
KHYF0623	H202304515	Pregnant	normal	140	83.1	29.3	3111.41	2477.65	83.552	8.14662	0.316638	0.334769	Not Detected
KHYF0624	H202304518	Non-pregnant	normal	137	89.9	30.1	3120.11	2456.87	81.7765	36.0504	0.224162	0.53647	Not Detected
KHYF0625	H202304519	Non-pregnant	normal	148	94.9	30.9	3531.28	2805.41	98.2706	12.4148	0.209958	0.622185	Not Detected
KHYF0626	H202304521	Pregnant	normal	133	84	29.6	2957.65	2320.5	78.9193	30.3207	0.223684	0.427579	Not Detected
KHYF0627	H202304524	Pregnant	normal	124	92.1	29.7	2753.15	2032.21	71.4631	1.28172	0.340838	0.100499	Not Detected
KHYF0628	H202304525	Pregnant	normal	130	84.6	30.2	2627.67	2167.94	79.5273	4.70693	0.299519	0.380064	Not Detected
KHYF0629	H202304553	Pregnant	normal	118	96.2	32.4	3119.21	2505.46	84.3428	30.4086	0.277729	0.729818	Not Detected
KHYF0630	H202304577	Pregnant	α3.7/αα	130	79.1	26.1	2883.45	2266.85	77.901	6.12682	0.17619	0.869722	Not Detected
KHYF0631	H202304598	Pregnant	normal	132	88.1	32.1	2902.41	2174.81	74.9245	22.3453	0.801595	0.565575	Not Detected
KHYF0632	H202304609	Pregnant	normal	124	93.6	31.8	2789.31	2226.12	72.9476	4.2034	0.590402	0.550109	Not Detected
KHYF0633	H202304614	Non-pregnant	normal	159	83.1	30.9	3896.7	3052.15	94.921	13.5271	2.01995	1.08366	Not Detected
KHYF0634	H202304620	Pregnant	normal	121	92.1	33	2812.39	2171.41	72.3172	12.9074	0.519364	0.491338	Not Detected
KHYF0635	H202304621	Non-pregnant	normal	105	67.6	20	2444.16	1873.23	48.0834	3.34936	0.447854	0.411736	Not Detected
KHYF0636	H202304664	Pregnant	normal	152	85.4	28.9	3380.88	3123.55	107.476	10.8413	0.00232008	0.397639	Not Detected
KHYF0637	H202304673	Pregnant	normal	137	92.4	32.5	2703.99	2265.56	77.5765	21.0313	0.579466	0.632263	Not Detected
KHYF0638	H202304700	Pregnant	normal	119	94.1	33.3	2980.08	2780.62	78.9268	36.1406	0.402032	0.599962	Not Detected
KHYF0639	H202304704	Pregnant	normal	122	83.9	27.6	2997.57	2840.87	80.1689	9.58681	0.001	0.306945	Not Detected
KHYF0640	H202304760	Pregnant	normal	164	89	30	3318.2	2981.53	103.265	21.1357	0.001	0.84989	Not Detected
KHYF0641	H202304761	Pregnant	βHb E/βN	128	78.2	27.1	3392.4	3183.96	121.527	43.9036	1.47689	0.224464	Detected
KHYF0642	H202304807	Pregnant	normal	115	94.2	31.9	2660.07	2466.77	86.2824	11.846	0.459312	0.617204	Not Detected
KHYF0643	H202304810	Pregnant	normal	119	89.4	29.5	3229.98	2708.92	76.9313	3.53916	0.0929964	0.398349	Not Detected
KHYF0644	H202304825	Pregnant	normal	122	92.9	31.9	2963.29	2728.6	85.9504	20.2882	0.618643	0.527553	Not Detected
KHYF0645	H202304838	Pregnant	normal	102	77.8	25.9	2538.35	2255.76	65.6741	6.5317	0.173939	0.28117	Not Detected
KHYF0646	H202304862	Pregnant	normal	118	90.2	31.4	2977.71	2579.75	83.8952	15.0702	0.001	0.255248	Not Detected
KHYF0647	H202304865	Pregnant	normal	138	90.8	30.9	3306.6	3012.91	93.7685	30.8205	0.0942648	0.511029	Not Detected
KHYF0648	H202304886	Pregnant	normal	142	92.6	31.9	2855.42	2656.73	85.514	208.069	1.94032	1.96944	Not Detected
KHYF0649	H202304897	Pregnant	normal	116	93.4	31.9	2997.69	2690.22	95.115	21.9215	0.118255	0.429392	Not Detected
KHYF0650	H202304900	Pregnant	normal	172	88.2	31.2	3007.91	2798.13	85.6557	11.9768	1.49688	0.288874	Not Detected
KHYF0651	H202304904	Pregnant	normal	139	89.3	30.5	3444.58	3237.65	113.69	34.353	0.001	0.542945	Not Detected
KHYF0652	H202304915	Pregnant	normal	137	85.8	29.8	4098.26	3524.78	123.441	17.7919	0.17246	0.471683	Not Detected
KHYF0653	H202304925	Non-pregnant	--SEA/αα	148	66.4	21.2	3715.11	3402.38	99.8596	48.6076	63.3301	1.68091	Not Detected
KHYF0654	H202304926	Non-pregnant	--SEA/αα	119	68	21.2	3342.55	3088.66	99.5686	42.9362	45.7926	1.39949	Not Detected
KHYF0655	H202304927	Non-pregnant	normal	159	85.7	29.4	4375.7	3847.1	123.291	26.4535	0.811541	0.32355	Not Detected
KHYF0656	H202304946	Pregnant	normal	139	93.4	32.6	3792.5	3216.57	94.7122	34.2414	0.498649	0.668753	Not Detected
KHYF0657	H202305013	Pregnant	normal	149	91.7	30.9	3603.03	3043.95	91.6536	81.0412	0.92904	1.42879	Not Detected
KHYF0658	H202305036	Pregnant	normal	118	88.9	29.9	3072.55	2780.35	90.9672	112.573	0.851676	1.12643	Not Detected
KHYF0659	H202305041	Non-pregnant	normal	137	90.8	30.7	3716.5	3404.76	108.166	51.155	0.882168	0.71481	Not Detected
KHYF0660	H202305046	Pregnant	normal	129	88.3	29.7	3203.34	2667.88	84.8202	16.9041	0.217014	0.551862	Not Detected
KHYF0661	H202305075	Pregnant	normal	122	88.6	30.3	3444.7	2895.17	98.707	55.7605	0.159718	0.9176	Not Detected
KHYF0662	H202305131	Non-pregnant	α3.7/αα	149	84.4	29.5	3700.12	3132.83	105.816	53.7296	0.740452	0.604721	Not Detected
KHYF0663	H202305142	Pregnant	normal	145	89.1	30.5	3538.93	3193.65	102.65	34.074	1.31569	0.84471	Not Detected
KHYF0664	H202305163	Non-pregnant	normal	141	96.3	32.6	3003.09	2641.77	82.3808	6.52838	1.15954	0.487031	Not Detected
KHYF0665	H202305166	Non-pregnant	--SEA/αα	129	72.3	22.3	3473.55	3018.01	91.0269	8.25274	29.7066	1.61638	Not Detected
KHYF0666	H202305186	Pregnant	normal	129	90.3	30.6	3015.35	2667.91	83.8653	3.8765	0.165976	0.507425	Not Detected
KHYF0667	H202305206	Pregnant	normal	138	86.8	30.2	3280.57	2703.88	83.2275	49.9323	1.56349	1.07411	Not Detected
KHYF0668	H202305208	Pregnant	normal	142	89.4	30	3246.33	2804.42	91.4223	32.0644	0.900564	0.649047	Not Detected
KHYF0669	H202305212	Pregnant	normal	132	89.9	31.4	3071.16	2768.82	90.4973	24.686	0.866628	0.631205	Not Detected
KHYF0670	H202305216	Non-pregnant	β0/βN	98.9	66.8	21.4	2089.05	1761.2	110.199	61.9341	0.776874	0.521411	Not Detected
KHYF0671	H202305264	Pregnant	normal	108	87.6	29.2	3173.76	2826.83	85.5662	22.7797	0.155148	0.683153	Not Detected
KHYF0672	H202305305	Non-pregnant	--SEA/αα	120	69.2	20.7	3192.35	2754.61	84.8575	24.0059	32.4534	1.27835	Not Detected
KHYF0673	H202305326	Pregnant	normal	119	90.6	31.2	3093.63	2632.96	90.4674	56.4312	0.639114	0.783586	Not Detected
KHYF0674	H202305360	Non-pregnant	normal	92	53.9	15.6	1948.53	1645.7	99.0315	19.5677	0.289052	0.276124	Not Detected
KHYF0675	H202305361	Pregnant	normal	92	79.6	24	2492.62	2286.43	54.7862	0.001	0.143968	0.419839	Not Detected
KHYF0676	H202305362	Non-pregnant	normal	139	81.4	27	3496.92	3191.24	88.5539	10.9777	0.211285	0.484818	Not Detected
KHYF0677	H202305369	Non-pregnant	normal	106	76.8	24.1	2658.6	2471.09	68.1956	6.05524	0.0991032	0.375106	Not Detected
KHYF0678	H202305377	Pregnant	normal	120	90.5	31.6	3147.94	2815.44	90.9449	10.7739	0.0105647	0.799422	Not Detected
KHYF0679	H202305387	Non-pregnant	normal	134	93.7	31.3	3128.81	2983.67	86.2973	53.326	0.001	0.544078	Not Detected
KHYF0680	H202305388	Non-pregnant	normal	131	78.4	25.4	3499.01	3275.15	93.8356	0.001	0.107705	0.349273	Not Detected
KHYF0681	H202305403	Pregnant	normal	136	94	32.5	2760.79	2494.85	85.1298	28.9889	0.212923	0.539704	Not Detected
KHYF0682	H202305411	Pregnant	normal	110	93.6	30.7	3568.43	3194.4	122.392	0.663889	0.0875028	0.665941	Not Detected
KHYF0683	H202305413	Pregnant	normal	153	95.2	31.2	3018.21	2807.72	100.512	25.0042	0.637938	0.559484	Not Detected
KHYF0684	H202305414	Pregnant	normal	125	89.4	30.9	3542.85	3219.19	120.923	17.1201	1.25009	0.468738	Not Detected
KHYF0685	H202305416	Pregnant	normal	139	90.8	31.1	3792.05	3330.23	99.2143	16.9931	0.039275	0.537899	Not Detected
KHYF0686	H202305419	Pregnant	βHb E/βN	129	77.7	27.1	3185.4	2834.07	112.829	22.3109	0.0175644	0.312887	Detected
KHYF0687	H202305423	Non-pregnant	normal	125	89.3	29.2	3097.64	2898.36	99.4269	8.88208	0.024633	0.386065	Not Detected
KHYF0688	H202305435	Pregnant	normal	130	90.6	30.7	3450.3	3146.94	113.862	16.8447	0.683357	0.534805	Not Detected
KHYF0689	H202305437	Non-pregnant	normal	155	87.3	30.3	4022.09	3738.64	124.101	22.5981	2.28178	0.457305	Not Detected
KHYF0690	H202305441	Pregnant	normal	145	86.2	29.8	3697.87	3365.66	131.553	12.2712	0.8736	0.736085	Not Detected
KHYF0691	H202305447	Pregnant	normal	136	87.8	29.7	3431.14	3342.91	119.479	16.5765	0.461152	0.665593	Not Detected
KHYF0692	H202305448	Pregnant	normal	122	91.8	29.5	2651.9	2472.04	85.0962	9.5544	0.389323	0.55927	Not Detected
KHYF0693	H202305466	Pregnant	α3.7/αα	135	89.7	29.6	2774.27	2538.07	83.5856	4.65114	0.0140809	0.937506	Not Detected
KHYF0694	H202305484	Pregnant	normal	115	87.1	30.8	3324.25	3116.37	92.545	13.3799	0.446359	0.677448	Not Detected
KHYF0695	H202305488	Pregnant	βHb E/βN	157	75.8	25.9	4040.73	3925.98	159.666	24.7893	0.25993	0.360365	Detected
KHYF0696	H202305500	Non-pregnant	normal	75	62.1	16.7	1787.83	1797.38	42.7346	0.001	0.0141674	0.248485	Not Detected
KHYF0697	H202305526	Pregnant	normal	132	90.7	32.2	3601.24	3262.74	118.342	15.1556	1.37668	0.721315	Not Detected
KHYF0698	H202305534	Pregnant	normal	125	90	32.1	3358	3153.3	106.141	10.5955	0.403796	0.545824	Not Detected
KHYF0699	H202305585	Pregnant	normal	141	89.7	29	3971.47	3629.84	113.377	7.37792	0.720308	0.47838	Not Detected
KHYF0700	H202305589	Pregnant	normal	138	91.3	32.5	3351.62	3042.29	106.316	61.1625	0.0545874	1.26118	Not Detected
KHYF0701	H202305594	Pregnant	normal	136	84.8	28.3	3225.37	2783.41	98.2631	44.2276	0.723862	0.63677	Not Detected
KHYF0702	H202305633	Pregnant	normal	146	98.2	33.3	4123.18	3509.14	124.839	25.7793	0.055393	0.963554	Not Detected
KHYF0703	H202305651	Pregnant	normal	135	89.3	31.4	3185.69	2848.01	92.933	37.4225	0.0987672	0.787064	Not Detected
KHYF0704	H202305658	Non-pregnant	normal	128	85	28.6	3926.93	3415.98	119.602	5.11514	0.773405	0.35819	Not Detected
KHYF0705	H202305677	Non-pregnant	normal	109	89.9	29.6	3284.98	3118.34	98.6846	1.49182	0.0365484	0.366707	Not Detected
KHYF0706	H202305681	Non-pregnant	normal	127	90.2	28.9	3180.99	2879.09	89.2925	3.35185	0.868644	0.375483	Not Detected
KHYF0707	H202305683	Pregnant	normal	130	90.3	30.1	3162.97	3004	111.602	36.7115	0.527058	0.708387	Not Detected
KHYF0708	H202305695	Pregnant	normal	141	88.8	31.5	3298.06	3001.04	110.744	26.2802	0.413666	0.57427	Not Detected
KHYF0709	H202305697	Pregnant	normal	123	86.8	29.2	2974.16	2688.11	86.1705	11.0628	0.215023	0.29879	Not Detected
KHYF0710	H202305711	Pregnant	normal	131	87	29.4	3500.27	3089.65	98.9867	25.6083	0.453852	0.598149	Not Detected
KHYF0711	H202305713	Pregnant	normal	116	75.9	24.5	2968.15	2557.85	71.575	1.09225	0.280946	0.264417	Not Detected
KHYF0712	H202305737	Pregnant	normal	117	92.8	31.4	3483.07	3066.8	126.081	92.3783	0.15141	0.794834	Not Detected
KHYF0713	H202305747	Pregnant	normal	149	95.7	30.3	3837.82	3501.32	119.893	45.4514	2.64508	0.899248	Not Detected
KHYF0714	H202305761	Pregnant	normal	141	84.4	28.5	3340.18	3015.77	101.926	1.97564	1.06109	0.0996558	Not Detected
KHYF0715	H202305769	Non-pregnant	normal	157	83.4	29.3	3713.89	3514.24	125.615	9.78978	0.001	0.256173	Not Detected
KHYF0716	H202305771	Pregnant	normal	115	85.4	28.5	3445.64	3298.61	114.709	17.6792	0.863604	0.488637	Not Detected
KHYF0717	H202305788	Pregnant	normal	157	87.7	30.3	3310.8	2956.44	101.016	37.4973	0.550082	0.328412	Not Detected
KHYF0718	H202305791	Pregnant	normal	118	76.3	23.5	2985.15	2763.04	85.182	19.9642	0.248153	0.423672	Not Detected
KHYF0719	H202305802	Pregnant	normal	134	78.5	26.4	3228.39	2964.63	103.384	11.0787	0.001	0.422584	Not Detected
KHYF0720	H202305823	Pregnant	normal	118	88.1	29.4	2994.96	2784.53	92.5152	6.81018	0.001	0.293188	Not Detected
KHYF0721	H202305825	Pregnant	normal	146	83	28.5	3289.11	3144.66	138.114	28.507	1.34543	0.238591	Not Detected
KHYF0722	H202305858	Pregnant	normal	138	90.9	30.7	3562.58	3423.46	117.965	26.8226	0.721098	0.813186	Not Detected
KHYF0723	H202305875	Pregnant	normal	122	88.5	30.6	3441.31	3277.57	102.754	51.9443	0.441731	1.24327	Not Detected
KHYF0724	H202305888	Pregnant	normal	89	69.4	22.5	2564.37	2322.64	71.3474	3.88315	0.290254	0.321145	Not Detected
KHYF0725	H202305890	Pregnant	normal	150	94.9	33	3781.18	3631.2	131.121	18.8911	0.044042	0.890368	Not Detected
KHYF0726	H202305903	Pregnant	normal	142	90	31.8	3400	3166.62	112.62	38.327	0.409584	0.385577	Not Detected
KHYF0727	H202305904	Pregnant	normal	152	90.8	32.4	3245.96	3003.56	118.905	43.6923	0.256444	0.578673	Not Detected
KHYF0728	H202305917	Pregnant	normal	137	90.7	40.2	3457.29	3217.93	112.631	17.6673	1.26378	0.412106	Not Detected
KHYF0729	H202305921	Pregnant	normal	146	81.1	29	3857.72	3555.72	126.805	58.2924	0.001	0.657623	Not Detected
KHYF0730	H202305952	Pregnant	normal	150	89	30.4	3646.47	3503.36	130.531	12.3662	0.21735	0.250335	Not Detected
KHYF0731	H202305985	Pregnant	normal	133	93.1	30.8	4348.73	3763.12	132.691	47.8871	0.0727087	0.733333	Not Detected
KHYF0732	H202305994	Pregnant	normal	129	85.9	29.4	1743.66	1410.9	38.5831	1.0683	0.0410332	0.116676	Not Detected
KHYF0733	H202305998	Pregnant	normal	145	96.4	33	4042.69	3608.42	118.513	25.8802	0.00652403	0.612372	Not Detected
KHYF0734	H202306019	Pregnant	normal	116	92.3	32	3742.65	3053.68	106.566	43.1831	0.44347	0.876456	Not Detected
KHYF0735	H202306022	Pregnant	normal	149	86.7	29.2	3377.94	3095.09	95.6036	24.54	0.0825913	0.474717	Not Detected
KHYF0736	H202306033	Pregnant	α3.7/αα	115	86.5	29.3	3171.55	2749.31	83.0522	7.75954	0.001	0.675968	Not Detected
KHYF0737	H202306075	Pregnant	normal	141	90	29.9	3071.36	2774.88	95.2978	34.9132	0.643852	0.542627	Not Detected
KHYF0738	H202306082	Pregnant	normal	131	93.1	31.1	3175.07	2738.6	91.9967	69.6662	0.806795	0.44198	Not Detected
KHYF0739	H202306091	Pregnant	normal	126	88.2	31.6	4158.73	3641.74	139.987	13.3454	0.751388	0.587701	Not Detected
KHYF0740	H202306152	Pregnant	normal	132	89.4	31.7	3636.7	3233.67	105.455	6.53028	0.187043	0.598941	Not Detected
KHYF0741	H202306182	Pregnant	normal	137	91.6	31.9	3498.64	3062.14	100.124	105.503	0.0856632	1.21515	Not Detected
KHYF0742	H202306198	Pregnant	normal	161	92	32.3	3839.82	3415.98	109.345	10.8859	0.29988	0.581736	Not Detected
KHYF0743	H202306250	Pregnant	normal	115	86.8	29.8	3380.39	2998.66	92.9404	102.754	0.472945	0.952972	Not Detected
KHYF0744	H202306254	Pregnant	normal	125	87	29.6	3652.64	3050.92	93.0337	60.9513	0.544958	0.869722	Not Detected
KHYF0745	H202306260	Pregnant	normal	120	92.1	32.7	3456.47	3031.61	103.787	1.48399	0.0168008	0.420128	Not Detected
KHYF0746	H202306262	Pregnant	normal	151	85.3	30.4	3590.98	3206.98	123.262	45.3933	0.904344	0.649261	Not Detected
KHYF0747	H202306266	Pregnant	normal	136	93.5	32	3805.7	3347.3	95.2493	26.2481	0.0623524	0.708047	Not Detected
KHYF0748	H202306303	Pregnant	normal	119	77.2	23.8	3016.9	2831.69	81.1984	0.84188	0.001	0.38978	Not Detected
KHYF0749	H202306304	Pregnant	normal	148	92.5	30.7	3702.57	3395.72	109.587	11.3272	0.772817	0.31151	Not Detected
KHYF0750	H202306308	Pregnant	normal	131	92.8	31.6	3572.88	3098.83	108.565	24.9258	0.948528	0.435608	Not Detected
KHYF0751	H202306309	Pregnant	normal	142	90.9	42.1	3434.81	3099.51	109.912	62.0742	1.97358	0.619077	Not Detected
KHYF0752	H202306322	Pregnant	normal	150	86.2	30.1	3734.48	3481.6	104.115	26.241	0.201944	0.517563	Not Detected
KHYF0753	H202306332	Non-pregnant	normal	148	94.3	32.3	3955.08	3226.6	119.647	58.4289	1.15819	0.959558	Not Detected
KHYF0754	H202306343	Non-pregnant	α3.7/αα	142	81.9	27.4	3711.56	3304.36	98.4832	55.6976	0.001	1.30551	Not Detected
KHYF0755	H202306346	Pregnant	normal	134	92.1	30.9	3263.08	2993.36	100.833	39.7443	0.00836279	0.576127	Not Detected
KHYF0756	H202306349	Pregnant	normal	119	77.7	24.8	3046.44	2729.01	79.4341	12.1466	0.001	0.459451	Not Detected
KHYF0757	H202306350	Non-pregnant	normal	133	87.3	27.7	3133.76	2867.02	97.2224	21.6248	0.123791	0.443371	Not Detected
KHYF0758	H202306366	Pregnant	--SEA/αα	112	69.5	21.9	3301.61	3005.91	94.8837	12.5383	42.0672	1.37374	Not Detected
KHYF0759	H202306367	Non-pregnant	normal	147	85.5	27.6	3875.82	3360.22	91.3813	53.0886	2.09404	0.647211	Not Detected
KHYF0760	H202306373	Non-pregnant	normal	147	85.4	29.3	3634.05	3305.92	105.119	18.0958	0.956172	0.454715	Not Detected
KHYF0761	H202306376	Pregnant	normal	114	90.2	31	3222.18	2910.13	99.3933	16.6809	0.155198	0.663062	Not Detected
KHYF0762	H202306397	Pregnant	normal	147	80.3	30.8	3267.74	2813.33	109.89	45.963	1.40658	0.494416	Not Detected
KHYF0763	H202306399	Pregnant	normal	127	88	29.4	3045.42	2582.06	95.1672	40.4696	0.0835061	0.697842	Not Detected
KHYF0764	H202306400	Non-pregnant	normal	143	86	28.7	3615.54	3199.54	109.52	17.6732	0.862596	0.488755	Not Detected
KHYF0765	H202306414	Pregnant	normal	136	88.8	30.6	3046.69	2773.14	86.4017	61.3572	2.25708	0.780552	Not Detected
KHYF0766	H202306416	Pregnant	normal	143	91	31.4	5676.68	5029.28	150.494	60.9904	1.07982	1.29293	Not Detected
KHYF0767	H202306420	Non-pregnant	normal	150	88.6	31	3466.89	2830.09	82.8396	6.00112	0.886788	0.476693	Not Detected
KHYF0768	H202306426	Pregnant	normal	119	90.8	31.4	3105.4	2651.83	90.1466	21.8978	0.872508	0.650149	Not Detected
KHYF0769	H202306458	Non-pregnant	normal	147	90.7	31	3084.07	2849.54	110.68	48.3821	0.736336	0.474799	Not Detected
KHYF0770	H202306462	Non-pregnant	normal	153	90	31.3	3242.94	3069.08	109.528	27.7604	1.20733	0.56095	Not Detected
KHYF0771	H202306464	Pregnant	--SEA/αα	118	68.3	21.7	2506.27	2300.58	71.5377	11.8724	34.4106	0.851518	Not Detected
KHYF0772	H202306466	Non-pregnant	normal	133	100.9	30	3337.49	3006.42	102.049	18.3949	0.471022	0.266111	Not Detected
KHYF0773	H202306467	Pregnant	normal	141	92	32.1	3400.78	3055.07	97.3082	7.45116	0.57482	0.480082	Not Detected
KHYF0774	H202306471	Pregnant	normal	142	86.7	30.3	2876.14	2672.37	92.6271	32.1084	0.72035	0.361298	Not Detected
KHYF0775	H202306486	Non-pregnant	normal	122	82.5	27.1	3041.58	2804.52	92.6495	14.0885	0.185623	0.146971	Not Detected
KHYF0776	H202306510	Non-pregnant	normal	131	84.5	29	2636.61	2582.57	88.774	2.76891	0.001	0.0134162	Not Detected
KHYF0777	H202306513	Pregnant	normal	122	85.6	30.8	2874.66	2760.26	97.215	3.58925	0.231571	0.128767	Not Detected
KHYF0778	H202306541	Non-pregnant	normal	158	86.1	30	3249.6	3189.95	109.11	11.6586	1.06378	0.433448	Not Detected
KHYF0779	H202306555	Pregnant	normal	113	75.3	25.8	2943.15	2754.34	95.2679	20.7654	0.126739	0.328893	Not Detected
KHYF0780	H202306574	Pregnant	normal	97	91.1	30.7	2196.59	1978.43	64.3462	15.52	0.0166522	0.274274	Not Detected
KHYF0781	H202306579	Pregnant	normal	142	94.8	33.6	2530.99	2033.51	73.2535	13.3834	1.0012	0.339075	Not Detected
KHYF0782	H202306581	Pregnant	normal	123	87.6	28.9	3058.62	2868.82	88.0317	12.4825	0.203532	0.463159	Not Detected
KHYF0783	H202306582	Pregnant	normal	106	67	21.1	2152.01	2119.12	59.6054	0.884042	0.001	0.139964	Not Detected
KHYF0784	H202306583	Pregnant	normal	124	85.4	28.8	2294.86	1685.75	54.596	190.608	0.722736	1.24017	Not Detected
KHYF0785	H202306591	Pregnant	normal	133	78.6	25.6	2767.45	2605.96	88.401	7.22503	0.656225	0.251652	Not Detected
KHYF0786	H202306608	Pregnant	normal	126	88.7	30.3	3185.12	3080.57	94.6376	4.89519	0.820453	0.197343	Not Detected
KHYF0787	H202306621	Pregnant	normal	147	85.9	30.1	3411.69	3014.24	114.157	4.18774	0.001	0.172353	Not Detected
KHYF0788	H202306623	Pregnant	normal	122	88.7	30.7	3016.61	2771.75	96.1482	5.08903	0.001	0.300706	Not Detected
KHYF0789	H202306625	Pregnant	normal	122	93.8	32.7	3060.41	2795	94.7233	15.0476	0.365266	0.501587	Not Detected
KHYF0790	H202306652	Pregnant	normal	132	88.7	30.4	2974.12	2714.22	110.505	22.9815	0.650756	0.461901	Not Detected
KHYF0791	H202306674	Non-pregnant	β0/βN	108	63.4	19.4	2633.14	2327.4	157.51	58.8515	0.800176	0.46506	Not Detected
KHYF0792	H202306681	Non-pregnant	normal	141	92.5	32	3351.54	3105.83	96.3795	10.7192	0.24591	0.24181	Not Detected
KHYF0793	H202306688	Pregnant	normal	147	88.1	30.5	2949.48	2672.57	104.776	11.984	0.0631806	0.48399	Not Detected
KHYF0794	H202306695	Non-pregnant	normal	180	85.7	26.5	4430.45	3883.14	104.682	29.269	0.429341	0.346179	Not Detected
KHYF0795	H202306696	Pregnant	normal	117	91.8	30.1	5326.92	4817.12	155.806	103.898	2.33243	0.96829	Not Detected
KHYF0796	H202306711	Non-pregnant	normal	137	90.5	31.7	5800.49	5388.32	145.183	4.25207	1.18381	0.291538	Not Detected
KHYF0797	H202306725	Pregnant	normal	125	91.5	32.1	5356.75	4770.2	158.741	75.5727	2.32327	1.10667	Not Detected
KHYF0798	H202306726	Pregnant	normal	133	94.4	31.3	5803.75	5189.76	155.53	45.7066	0.272824	0.770784	Not Detected
KHYF0799	H202306727	Pregnant	normal	97	77.5	24.6	4797.78	4571.64	133.844	30.2614	0.241256	0.764938	Not Detected
KHYF0800	H202306738	Pregnant	normal	142	89	29.8	5507.11	3964.06	121.628	65.4963	0.985068	0.884596	Not Detected
KHYF0801	H202306747	Pregnant	normal	135	78.5	25.6	4401.85	3924.62	105.928	2.47205	0.241735	0.347778	Not Detected
KHYF0802	H202306757	Pregnant	normal	126	89.7	29.5	4546.9	4152.08	125.884	211.939	0.245154	1.64894	Not Detected
KHYF0803	H202306858	Pregnant	normal	141	90.9	31.3	2709.02	2611.2	93.623	166.18	0.50232	2.331	Not Detected
KHYF0804	H202306867	Non-pregnant	normal	147	93.3	31.9	3971.59	3400	118.241	14.9562	1.3104	1.0582	Not Detected
KHYF0805	H202306884	Pregnant	normal	130	87	30	3203.42	2696.2	110.408	10.683	1.596	1.0212	Not Detected
KHYF0806	H202306901	Pregnant	normal	140	90	30.4	3579.34	3128	109.289	18.3985	0.28308	1.1248	Not Detected
KHYF0807	H202306916	Pregnant	normal	127	95	30	3640.63	3029.4	111.154	23.5026	0.2688	1.4874	Not Detected
KHYF0808	H202306972	Pregnant	normal	140	86.6	30.4	3015.47	2546.6	89.147	10.41	1.6968	1.036	Not Detected
KHYF0809	H202307009	Non-pregnant	normal	157	88.2	32.5	3644.71	3284.4	109.289	31.2181	0.2688	1.4874	Not Detected
KHYF0810	H202307010	Pregnant	normal	146	83.6	29	3281.06	2978.4	116.376	16.1432	0.6636	1.1174	Not Detected
KHYF0811	H202307017	Pregnant	normal	153	87.4	29.7	2815.25	2420.8	120.106	40.9515	1.9992	1.48	Not Detected
KHYF0812	H202307020	Non-pregnant	normal	148	90.9	30.1	3117.62	2818.6	104.067	67.0655	2.6712	1.4578	Not Detected
KHYF0813	H202307026	Pregnant	normal	150	85.2	29.2	3460.84	3029.4	98.099	7.48997	0.9912	1.1026	Not Detected
KHYF0814	H202307027	Pregnant	normal	148	88.3	29.4	2721.28	2584	103.694	36.0848	0.59472	1.221	Not Detected
KHYF0815	H202307031	Pregnant	normal	130	93.6	31	2496.55	2594.2	102.948	12.8196	0.27552	1.2802	Not Detected
KHYF0816	H202307045	Pregnant	normal	133	87.9	30.3	3056.33	2784.6	95.861	42.4946	0.4872	1.3246	Not Detected
KHYF0817	H202307056	Pregnant	normal	116	75.5	23.5	3117.62	2516	80.195	6.49289	0.44016	1.073	Not Detected
KHYF0818	H202307069	Non-pregnant	normal	143	87.9	28.8	3828.58	3468	115.63	24.6896	0.28056	0.9398	Not Detected
KHYF0819	H202307085	Pregnant	normal	131	85.5	29.7	3138.05	2890	110.408	37.2718	0.40656	1.3246	Not Detected
KHYF0820	H202307094	Pregnant	normal	128	88.7	29.6	3644.71	3240.2	129.058	13.6505	1.2852	1.036	Not Detected
KHYF0821	H202307095	Non-pregnant	normal	87	70.7	20.9	2406.65	2053.6	59.307	3.29986	0.29484	0.9398	Not Detected
KHYF0822	H202307096	Pregnant	normal	127	95.6	33.1	2876.54	2764.2	88.401	28.6067	0.46536	1.1618	Not Detected
KHYF0823	H202307116	Non-pregnant	normal	135	91.1	32.6	3983.85	3842	138.756	58.9939	0.5124	2.0646	Not Detected
KHYF0824	H202307134	Pregnant	normal	122	84.4	28.4	2937.83	2380	80.568	1.11697	0.252	0.9324	Not Detected
KHYF0825	H202307148	Pregnant	normal	155	93.2	30.7	3689.66	3379.6	125.701	30.3872	1.0836	1.5466	Not Detected
KHYF0826	H202307232	Pregnant	βHb E/βN	112	75.2	25.4	2917.4	2733.6	117.122	20.2977	1.05	0.8954	Detected
KHYF0827	H202307237	Pregnant	normal	113	83.7	26.7	2309.69	2647.75	74.0442	0.289011	0.434028	0.470943	Not Detected
KHYF0828	H202307241	Pregnant	normal	115	93.9	31.8	3632.45	3226.6	123.09	11.5614	1.2012	1.2358	Not Detected
KHYF0829	H202307324	Non-pregnant	normal	83	68.9	20.5	2831.6	2301.8	68.632	6.96769	0.3234	0.9916	Not Detected
KHYF0830	H202307346	Pregnant	normal	128	94.8	31.7	2940.86	3099	97.5432	27.7805	0.3759	0.770414	Not Detected
KHYF0831	H202307351	Non-pregnant	normal	156	86.8	29.8	2788	2959.9	99.3336	9.51642	2.00155	0.44827	Not Detected
KHYF0832	H202307367	Pregnant	α3.7/αα	121	80.1	26.8	2533.77	2750.36	91.3216	18.5849	3.15958	1.21353	Not Detected
KHYF0833	H202307381	Pregnant	normal	128	91.6	31.8	2951.11	3166.42	98.8599	27.5443	0.0982044	0.746734	Not Detected
KHYF0834	H202307382	Non-pregnant	normal	88	73.9	21.7	2449.07	2684.88	51.571	11.5935	0.117281	1.48577	Not Detected
KHYF0835	H202307385	Pregnant	--SEA/αα	112	65.5	20.4	2459.98	2702.18	77.1812	51.8873	35.7613	1.73634	Not Detected
KHYF0836	H202307406	Non-pregnant	normal	140	90.6	32.2	3330.09	2720	103.321	25.6392	0.29568	1.2136	Not Detected
KHYF0837	H202307407	Pregnant	normal	134	93.4	31.8	2676.58	2930.66	101.762	23.8183	0.171251	0.489036	Not Detected
KHYF0838	H202307416	Pregnant	normal	141	93.9	32.2	3661.06	2893.4	116.003	52.9402	0.46368	1.4874	Not Detected
KHYF0839	H202307418	Pregnant	normal	136	91	31.3	4008.37	3308.2	116.003	9.98267	0.34692	0.9694	Not Detected
KHYF0840	H202307440	Pregnant	normal	139	81.9	28.4	3121.7	2828.8	110.035	14.7188	0.48888	1.1396	Not Detected
KHYF0841	H202307449	Pregnant	normal	152	92.8	32	3326	3128	104.44	15.6684	0.26628	1.0582	Not Detected
KHYF0842	H202307504	Pregnant	normal	143	90.6	29.7	3661.06	3274.2	110.408	15.5497	0.9492	1.2432	Not Detected
KHYF0843	H202307514	Pregnant	normal	117	93.2	31.4	3207.51	2995.4	130.177	4.16637	0.273	1.0656	Not Detected
KHYF0844	H202307530	Pregnant	normal	138	94.4	31.9	3150.31	3022.6	98.099	35.3726	1.134	1.1544	Not Detected
KHYF0845	H202307573	Pregnant	normal	154	94	31	3268.8	2587.4	102.202	8.29713	0.25284	1.406	Not Detected
KHYF0846	H202307577	Pregnant	normal	145	87.5	30.3	3930.73	3338.8	107.797	7.11013	0.36456	1.1914	Not Detected
KHYF0847	H202307591	Pregnant	normal	138	92.6	32	3620.2	3274.2	117.122	21.2473	0.48972	1.1248	Not Detected
KHYF0848	H202307649	Pregnant	normal	147	83.5	28.2	3902.13	3570	131.296	34.7791	0.67788	1.5318	Not Detected
KHYF0849	H202307656	Pregnant	normal	135	92.2	31	2691.04	3260.94	107.424	8.98369	0.784795	0.673082	Not Detected
KHYF0850	H202307675	Non-pregnant	normal	147	89.4	30.6	3914.39	3536	126.074	7.73924	0.81144	1.0656	Not Detected
KHYF0851	H202307682	Non-pregnant	normal	133	87.6	30	2443.02	2747.51	88.9754	6.3279	0.481454	0.288615	Not Detected
KHYF0852	H202307687	Pregnant	normal	133	90.6	31.1	2825.67	2946.2	79.4192	8.90499	0.648866	0.498575	Not Detected
KHYF0853	H202307688	Pregnant	normal	146	86	29.7	2912.42	3249.35	118.8	8.32977	1.52872	0.338047	Not Detected
KHYF0854	H202307689	Non-pregnant	normal	164	86.6	29.3	3219.77	3380.08	112.333	69.7042	0.160936	0.763606	Not Detected
KHYF0855	H202307690	Pregnant	normal	136	88.6	29.6	3117.05	3680.16	118.756	6.15281	0.556114	1.02705	Not Detected
KHYF0856	H202307713	Pregnant	normal	144	89.2	29.9	3481.27	2934.2	96.234	6.46915	0.9492	1.0508	Not Detected
KHYF0857	H202307722	Pregnant	normal	124	85.82	28.8	2393.62	2699.12	87.379	26.6826	0.792616	0.648958	Not Detected
KHYF0858	H202307728	Pregnant	normal	152	91.7	30.7	3779.18	4224.16	145.962	19.487	0.130788	0.94017	Not Detected
KHYF0859	H202307729	Pregnant	normal	141	86.3	30.6	2760.09	2930.9	85.9206	17.6768	0.607471	0.634557	Not Detected
KHYF0860	H202307741	Pregnant	normal	128	90.3	31.8	3922.56	3604	140.994	48.3109	0.33768	0.9324	Not Detected
KHYF0861	H202307742	Pregnant	normal	147	87.7	30.6	3117.62	2604.4	111.154	7.91729	1.512	0.9324	Not Detected
KHYF0862	H202307743	Pregnant	normal	140	86.9	30.4	2614.79	3041.13	92.407	5.84716	0.18968	0.488156	Not Detected
KHYF0863	H202307746	Pregnant	normal	139	86.8	28.9	2581.25	2578.22	79.3856	3.67353	0.309347	0.336641	Not Detected
KHYF0864	H202307747	Pregnant	--SEA/αα	113	74.7	22.6	2774.39	2386.8	81.314	17.805	23.184	2.183	Not Detected
KHYF0865	H202307763	Pregnant	normal	158	87.8	30	2908.41	3325.37	110.818	19.354	1.18381	0.479883	Not Detected
KHYF0866	H202307782	Pregnant	normal	116	87.5	30.1	2385.24	2714.08	91.758	12.9561	0.654923	0.652088	Not Detected
KHYF0867	H202307786	Non-pregnant	normal	147	89.9	30.8	2895.34	3163.8	93.3731	67.3468	0.226363	0.918784	Not Detected
KHYF0868	H202307788	Pregnant	α3.7/αα	137	79.3	26.8	2831.15	3226.97	97.7036	65.8417	0.195989	1.48851	Not Detected
KHYF0869	H202307789	Pregnant	normal	148	89.8	31.4	2417.89	2890.82	99.0427	39.0499	1.02194	0.640189	Not Detected
KHYF0870	H202307790	Pregnant	normal	136	87.3	30.4	3101.27	2743.8	110.408	12.3448	0.26964	1.1618	Not Detected
KHYF0871	H202307791	Non-pregnant	normal	146	91.4	29.7	3424.07	3009	130.177	26.2327	0.28392	0.9842	Not Detected
KHYF0872	H202307801	Pregnant	normal	154	94.5	33.6	2728.84	2972.65	89.1358	9.23071	0.532375	0.908572	Not Detected
KHYF0873	H202307816	Pregnant	normal	128	85.1	28	2859.1	3208.61	104.891	13.0546	0.246305	0.599385	Not Detected
KHYF0874	H202307823	Pregnant	normal	125	90.5	30.5	2414.09	2803.33	85.4506	27.1669	0.665969	0.642468	Not Detected
KHYF0875	H202307831	Pregnant	normal	140	93.8	32	2575.57	2825.09	95.1933	35.4106	0.590999	0.74666	Not Detected
KHYF0876	H202307834	Pregnant	normal	144	88.5	30.6	2746.28	3151.94	87.9758	24.0059	0.1396	0.789358	Not Detected
KHYF0877	H202307859	Pregnant	normal	161	85.1	29.7	2523.02	2687.87	87.2522	12.1015	0.115055	0.565138	Not Detected
KHYF0878	H202307864	Non-pregnant	α3.7/αα	153	80.7	25.9	3059.07	3287.15	99.2217	7.55941	0.133829	0.902134	Not Detected
KHYF0879	H202307867	Pregnant	normal	163	86.3	31	3314.24	3748.5	96.5361	9.63369	0.1544	0.771598	Not Detected
KHYF0880	H202307871	Pregnant	normal	131	96.4	29.8	2236.59	2647.24	87.7482	20.5778	1.16138	0.502941	Not Detected
KHYF0881	H202307875	Pregnant	normal	140	94.5	32.1	2734.19	3131.64	92.3958	17.5011	0.704046	1.01321	Not Detected
KHYF0882	H202307879	Pregnant	normal	142	90	29.9	2689.36	2623.51	84.4509	17.5272	0.0535693	0.934028	Not Detected
KHYF0883	H202307880	Pregnant	normal	118	86.7	28.6	3281.96	3113.14	110.501	19.4775	0.649471	0.713649	Not Detected
KHYF0884	H202307882	Pregnant	normal	139	87.8	31	2567.36	2747.03	93.4514	17.0465	0.900648	1.1302	Not Detected
KHYF0885	H202307885	Pregnant	normal	130	91.3	29.6	3424.39	3143.54	109.017	21.9049	1.1576	1.09535	Not Detected
KHYF0886	H202307886	Pregnant	normal	123	97.6	32.5	2641.56	2683.18	80.5643	13.3086	0.585304	0.901098	Not Detected
KHYF0887	H202307889	Pregnant	normal	128	93.9	31.3	2892.36	3048.13	91.5342	12.6677	0.0574526	0.727583	Not Detected
KHYF0888	H202307899	Pregnant	--SEA/αα	119	70.7	23.7	2227.89	2337.67	66.5134	34.5999	20.6623	2.66356	Not Detected
KHYF0889	H202307925	Non-pregnant	normal	151	91.4	30.9	3264.06	3045.45	91.1612	4.19628	0.699384	0.330047	Not Detected
KHYF0890	H202307940	Pregnant	β0/βN	109	63.8	20.4	2071.56	1864.66	134.72	64.2689	0.156425	0.531949	Not Detected
KHYF0891	H202307962	Non-pregnant	normal	149	95.2	30.9	3027.64	2632.86	84.4621	214.716	1.77568	2.20846	Not Detected
KHYF0892	H202307968	Non-pregnant	normal	140	91.6	31	2638.62	2636.7	74.4321	32.2128	0.644179	0.60199	Not Detected
KHYF0893	H202307972	Pregnant	normal	126	83.5	30.2	3134.37	3012.91	86.7673	6.31342	0.887376	0.456114	Not Detected
KHYF0894	H202307985	Pregnant	normal	146	88.5	29.9	2857.67	2975.99	82.5897	4.12945	0.723358	0.37538	Not Detected
KHYF0895	H202307986	Pregnant	normal	135	92	31.9	2773.5	2479.65	71.0379	9.63215	0.65856	0.47562	Not Detected
KHYF0896	H202307987	Pregnant	normal	123	87.9	30.4	2867.39	2572.81	91.1239	29.9528	1.46983	0.769304	Not Detected
KHYF0897	H202307988	Pregnant	normal	128	94.9	31.2	3112.71	3121.44	93.5969	3.76148	1.2427	0.474999	Not Detected
KHYF0898	H202307991	Pregnant	normal	143	94.4	33.4	2935.26	2855.18	93.4104	10.8416	0.15561	0.595707	Not Detected
KHYF0899	H202308001	Pregnant	normal	140	91	31.5	3097.92	2724.25	84.0518	32.8585	1.02883	1.21959	Not Detected
KHYF0900	H202308008	Non-pregnant	normal	120	92.3	30.9	2669.79	2615.35	92.407	24.1899	0.378907	0.710089	Not Detected
KHYF0901	H202308026	Non-pregnant	normal	140	93.6	30.9	2708.61	2107.32	73.5593	57.0591	1.52191	1.11562	Not Detected
KHYF0902	H202308030	Pregnant	normal	123	88.1	29.9	2586.6	2484.07	84.6039	35.5803	0.972384	1.08395	Not Detected
KHYF0903	H202308032	Pregnant	α3.7/αα	139	83.3	28.3	3205.47	3084.34	96.9725	8.45963	1.77559	1.27154	Not Detected
KHYF0904	H202308033	Pregnant	normal	127	81.6	28.1	2409.51	2297.62	76.935	6.91202	0.1313	0.672268	Not Detected
KHYF0905	H202308035	Pregnant	normal	130	94.6	33.2	2692.14	2463.47	81.6945	10.7591	0.204691	0.482243	Not Detected
KHYF0906	H202308036	Non-pregnant	normal	127	94.1	33.8	3269.13	3261.99	101.907	107.428	1.34862	1.51915	Not Detected
KHYF0907	H202308038	Pregnant	normal	132	81.5	26.6	2747.06	2593.86	90.6688	60.6996	0.327944	1.03541	Not Detected
KHYF0908	H202308039	Pregnant	normal	129	87.6	30.3	2829.19	2806.63	78.5277	12.8979	0.1921	0.673171	Not Detected
KHYF0909	H202308043	Non-pregnant	normal	132	93.3	30.3	2490.54	2448.44	77.7369	6.33158	0.280123	0.587464	Not Detected
KHYF0910	H202308045	Pregnant	normal	143	85.4	28.9	2819.46	2819.69	77.8563	57.4781	0.511132	0.915454	Not Detected
KHYF0911	H202308049	Pregnant	normal	130	89.8	30.2	2780.03	2671.52	89.699	7.51347	0.426997	0.86432	Not Detected
KHYF0912	H202308050	Pregnant	normal	135	94.1	31.8	2703.38	2508.15	85.2529	32.6698	0.0587756	0.869796	Not Detected
KHYF0913	H202308052	Non-pregnant	normal	152	91.7	31.5	2787.14	2761.41	81.4334	200.876	2.09051	1.66182	Not Detected
KHYF0914	H202308055	Pregnant	normal	132	92.1	30.8	3017.22	2836.96	82.6083	67.2566	0.953064	1.58856	Not Detected
KHYF0915	H202308061	Pregnant	normal	136	88.1	30	2924.88	2597.5	79.5049	18.5564	0.204061	0.939652	Not Detected
KHYF0916	H202308068	Pregnant	normal	154	96	31.5	2882.39	2307.1	79.0499	32.8194	0.6972	0.791726	Not Detected
KHYF0917	H202308077	Non-pregnant	normal	158	87	30.4	3670.66	3578.16	104.515	13.9259	1.71133	0.934842	Not Detected
KHYF0918	H202308085	Non-pregnant	normal	131	89.2	30	2989.81	2902.82	92.3697	4.87263	0.0369701	0.566322	Not Detected
KHYF0919	H202308092	Pregnant	normal	180	83.6	26.5	2999.86	2608.34	106.667	3.71757	0.903168	0.767676	Not Detected
KHYF0920	H202308097	Pregnant	normal	126	83	28.3	2864.57	2620.07	86.2786	31.1932	1.99475	0.941058	Not Detected
KHYF0921	H202308099	Non-pregnant	normal	143	90.7	30.1	3499.5	3137.59	107.734	19.1546	0.327289	0.81659	Not Detected
KHYF0922	H202308113	Non-pregnant	normal	160	90.3	30.5	3026.99	2812.24	96.5884	16.5444	1.00548	0.411951	Not Detected
KHYF0923	H202308115	Non-pregnant	normal	133	82.8	28.2	2906.7	2866.47	84.5218	8.14555	0.682567	0.389011	Not Detected
KHYF0924	H202308119	Pregnant	normal	140	90.5	31.7	3540.23	3455.76	123.881	43.1071	1.30376	1.28856	Not Detected
KHYF0925	H202308126	Pregnant	normal	142	87.2	29.3	3314.03	2958.68	92.9591	10.9174	0.525538	0.469389	Not Detected
KHYF0926	H202308127	Pregnant	normal	126	90.7	31	3025.23	2846.68	82.6643	11.2536	1.13484	0.474244	Not Detected
KHYF0927	H202308130	Pregnant	normal	124	85.9	29.6	2916.18	2846.75	89.755	29.3474	0.0306617	0.773374	Not Detected
KHYF0928	H202308134	Non-pregnant	normal	142	89	30	3130.33	2749.27	90.9299	6.60352	0.230311	0.42456	Not Detected
KHYF0929	H202308146	Non-pregnant	normal	129	90.9	30.9	2683.73	2709.56	87.5356	16.2358	0.186883	0.833536	Not Detected
KHYF0930	H202308151	Pregnant	normal	130	84.4	27.4	3033	2736.35	96.2713	12.8801	0.862176	1.96618	Not Detected
KHYF0931	H202308153	Pregnant	normal	151	91.9	31.3	3311.91	3068.64	108.371	57.941	0.170167	1.58153	Not Detected
KHYF0932	H202308172	Pregnant	normal	136	78.2	27.2	2906.98	2621.74	90.6166	5.80455	0.00842184	0.652125	Not Detected
KHYF0933	H202308173	Pregnant	normal	148	98.3	32.8	2932.11	2838.83	100.206	19.5404	0.805249	1.03674	Not Detected
KHYF0934	H202308178	Pregnant	α3.7/αα	103	72.1	22.6	2555.87	2098.92	59.2063	6.73088	0.146588	1.25393	Not Detected
KHYF0935	H202308179	Pregnant	normal	136	85.8	30.3	2401.34	1970.57	66.5022	23.5145	1.04664	1.02749	Not Detected
KHYF0936	H202308181	Pregnant	normal	133.6	91.7	30.6	2463.57	1909	62.5148	20.4033	0.145513	0.780922	Not Detected
KHYF0937	H202308182	Pregnant	normal	143	88.5	29.9	2267.04	2005.29	62.9922	19.5831	0.712555	0.782476	Not Detected
KHYF0938	H202308215	Pregnant	normal	130	84.2	28.7	1007.73	826.71	30.6945	0.481245	0.219349	0.195974	Not Detected
KHYF0939	H202308216	Pregnant	normal	135.2	90.8	29.3	2082.02	1665.8	53.906	10.8024	0.600709	0.522869	Not Detected
KHYF0940	H202308217	Pregnant	normal	128.6	92.3	30	2167.17	1717.78	50.1648	12.3306	1.23606	0.372975	Not Detected
KHYF0941	H202308218	Pregnant	normal	134	95.4	32.2	845.189	664.768	25.1503	4.89756	0.417404	0.308343	Not Detected
KHYF0942	H202308219	Pregnant	normal	146	86	28.9	1697.12	1352.89	44.1222	6.24077	0.238216	0.359322	Not Detected
KHYF0943	H202308220	Pregnant	normal	120	88.8	30.2	2079.12	1711.32	59.1765	3.787	0.323459	0.312043	Not Detected
KHYF0944	H202308225	Pregnant	α3.7/αα	134	87.9	29.7	1999.48	1751.44	52.1902	28.7812	2.43356	1.80027	Not Detected
KHYF0945	H202308241	Non-pregnant	normal	129	79.6	27.5	2402.61	2434.88	75.9018	15.4393	0.502824	0.62678	Not Detected
KHYF0946	H202308244	Pregnant	normal	138	80.7	27.8	2530.17	2503.35	76.8678	14.0695	0.158668	0.530114	Not Detected
KHYF0947	H202308246	Non-pregnant	normal	147	91.9	31.2	3220.63	2963.92	89.2291	9.27094	1.35164	0.599548	Not Detected
KHYF0948	H202308248	Pregnant	normal	94	65.5	18.5	2382.06	2010.49	45.5955	2.04259	0.145454	0.557708	Not Detected
KHYF0949	H202308259	Pregnant	normal	131	91.7	31	2444.69	2249.47	71.6757	51.9467	0.309658	0.998112	Not Detected
KHYF0950	H202308266	Pregnant	--SEA/αα	123	68.1	21.5	2505.54	2572.17	65.0475	7.71645	27.1774	0.987234	Not Detected
KHYF0951	H202308269	Pregnant	normal	126	90.3	29.9	2134.28	1804.65	58.5423	17.5059	0.796874	0.692115	Not Detected
KHYF0952	H202308279	Pregnant	normal	148	92.3	30.6	2956.02	2788.14	92.0005	26.958	0.634024	0.809116	Not Detected
KHYF0953	H202308290	Non-pregnant	normal	145	88.8	28.4	3194.48	3055.75	98.7331	4.21599	0.922488	0.445295	Not Detected
KHYF0954	H202308291	Pregnant	normal	138	91.4	30.6	2893.5	2743.46	77.4982	9.37101	0.848568	0.320827	Not Detected
KHYF0955	H202308296	Non-pregnant	normal	148	96	33.2	2910.05	2710.07	83.0485	123.033	0.474659	1.03015	Not Detected
KHYF0956	H202308304	Pregnant	normal	126	85.7	29.1	2037.89	2031.87	69.2885	15.6565	0.157298	0.649875	Not Detected
KHYF0957	H202308305	Pregnant	α3.7/αα	122	85.6	28.8	2804.88	3155.37	92.7726	8.60444	0.661088	1.80775	Not Detected
KHYF0958	H202308310	Pregnant	normal	145	88.9	29.8	2932.4	3227.69	88.7181	2.00971	1.17634	0.347622	Not Detected
KHYF0959	H202308311	Non-pregnant	normal	138	93.2	32.2	2148.09	2416.24	63.1675	2.11666	1.08242	0.407888	Not Detected
KHYF0960	H202308321	Pregnant	normal	127	92	29.6	1997.6	2346.37	55.8717	7.4108	0.161339	0.873866	Not Detected
KHYF0961	H202308322	Pregnant	normal	155	86.7	30.8	3146.38	3433.66	118.234	26.5223	0.127319	0.873792	Not Detected
KHYF0962	H202308323	Non-pregnant	normal	125	78.3	23.8	2691.86	2711.87	76.7336	8.03089	0.463327	0.616279	Not Detected
KHYF0963	H202308359	Pregnant	normal	129.8	91.8	29.6	2011.17	1918.86	58.5162	10.4439	0.444629	0.457764	Not Detected
KHYF0964	H202308361	Pregnant	normal	145.7	91.4	29.3	2285.91	2095.9	70.027	28.8299	0.495827	0.70186	Not Detected
KHYF0965	H202308362	Pregnant	normal	146	82.9	30.1	2298.33	1941.3	56.9161	6.0499	0.479657	0.268598	Not Detected
KHYF0966	H202308363	Pregnant	normal	110.1	91.1	29.7	1670.36	1539.01	46.5467	1.69634	0.308574	0.374529	Not Detected
KHYF0967	H202308364	Pregnant	α3.7/αα	136	92.4	30.3	2039.24	1960.64	64.8833	6.95333	1.14862	0.468205	Not Detected
KHYF0968	H202308382	Pregnant	normal	141	89.5	31.4	2702.56	2687.12	89.2067	85.1672	0.201751	1.40844	Not Detected
KHYF0969	H202308388	Non-pregnant	normal	144	90.9	31.2	2973.63	3150.27	105.91	32.0288	1.74367	0.580634	Not Detected
KHYF0970	H202308392	Pregnant	normal	123	95	32.5	1972.72	2350.15	70.6014	13.7217	0.579482	0.576223	Not Detected
KHYF0971	H202308404	Pregnant	normal	154	95.1	31.4	2593.3	2339.68	80.3106	19.1985	0.234746	0.595448	Not Detected
KHYF0972	H202308405	Pregnant	normal	135	89.5	30.1	1942.69	1559.68	54.126	5.1739	0.742316	0.383594	Not Detected
KHYF0973	H202308406	Pregnant	normal	135	93.2	30.4	2788.41	2205.07	73.0968	57.249	1.17172	0.819698	Not Detected
KHYF0974	H202308420	Pregnant	normal	140	92	31	2539.33	2603.65	72.3284	31.738	0.723626	0.768934	Not Detected
KHYF0975	H202308422	Non-pregnant	β0/βN	88	53.9	16.7	2167.66	2166.79	123.459	38.7544	0.262273	0.482428	Not Detected
KHYF0976	H202308424	Pregnant	normal	146	92	31.4	2891.74	2806.46	91.4783	12.4659	0.61913	0.708942	Not Detected
KHYF0977	H202308425	Non-pregnant	normal	153	80.7	28.1	2811.33	2776.58	40.1796	10.8901	0.262021	0.218411	Not Detected
KHYF0978	H202308429	Non-pregnant	normal	153	98.4	34.9	3424.52	3212.69	90.8068	50.2196	0.737839	1.03008	Not Detected
KHYF0979	H202308430	Non-pregnant	normal	153	85	29.4	3099.72	3034.84	95.5887	16.1895	1.29948	0.505161	Not Detected
KHYF0980	H202308431	Pregnant	normal	146	85.2	29.3	2835.85	2639.35	79.8518	2.23393	0.309641	0.487246	Not Detected
KHYF0981	H202308433	Pregnant	normal	125	92.6	33	2395.99	2297.52	65.7301	56.6971	0.152762	0.925592	Not Detected
KHYF0982	H202308435	Non-pregnant	normal	143	91.6	30	3035.29	2740.5	92.8807	18.1943	0.647329	0.814	Not Detected
KHYF0983	H202308437	Pregnant	normal	119	97	32.4	2738.07	2529.94	78.6993	88.9194	0.844788	1.51826	Not Detected
KHYF0984	H202308440	Pregnant	normal	141	90.9	30.5	2710.24	2633.84	78.9044	47.258	0.66512	0.473593	Not Detected
KHYF0985	H202308441	Non-pregnant	normal	130	89	29.2	2028.21	2101.57	61.6867	9.83335	1.0878	0.406608	Not Detected
KHYF0986	H202308447	Pregnant	normal	130	90.8	31.4	3237.99	2939.95	92.2354	285.011	0.203238	2.4329	Not Detected
KHYF0987	H202308448	Pregnant	normal	134	94.1	31	2835.72	2626.87	78.9007	67.272	1.44892	1.00758	Not Detected
KHYF0988	H202308453	Non-pregnant	normal	137	92.8	30.6	3011.14	2598.89	95.5701	21.4479	0.631814	0.495341	Not Detected
KHYF0989	H202308459	Pregnant	normal	129	96.7	32.6	2671.06	2695.93	79.1954	78.0322	0.491728	1.21079	Not Detected
KHYF0990	H202308460	Pregnant	normal	133	90.9	29.4	2680.17	2654.28	75.7451	8.11196	0.742896	0.61585	Not Detected
KHYF0991	H202308464	Non-pregnant	normal	149	87.7	29	2698.97	2575.57	73.9883	2.586	0.132913	0.314345	Not Detected
KHYF0992	H202308466	Pregnant	normal	150	88.2	31.1	2862.12	2653.09	88.5838	12.6036	0.184691	0.534539	Not Detected
KHYF0993	H202308471	Pregnant	normal	141	89.9	30.2	2540.47	2456.36	65.6741	40.6274	0.741418	0.900654	Not Detected
KHYF0994	H202308472	Pregnant	normal	140	94.3	33.2	2884.51	2822.51	86.9165	8.19481	1.42439	0.649291	Not Detected
KHYF0995	H202308474	Pregnant	normal	140	96.3	32	2131.87	2219.79	62.9885	20.3333	0.215695	0.552395	Not Detected
KHYF0996	H202308495	Pregnant	normal	123	93.4	31.2	2593.96	2338.66	87.7109	50.1353	0.53503	0.898212	Not Detected
KHYF0997	H202308496	Pregnant	normal	129	91.7	30.6	2352.23	2266.41	71.422	17.4192	1.04614	0.500736	Not Detected
KHYF0998	H202308499	Pregnant	normal	87	69	19.2	1608.41	1492.67	36.4201	8.72552	0.194141	0.864912	Not Detected
KHYF0999	H202308501	Pregnant	β0/βN	119	63	19.3	2260.66	2032.89	129.133	72.8225	0.254906	0.689147	Not Detected
KHYF1000	H202308503	Pregnant	normal	140	91.7	30.6	2840.63	2780.21	91.1537	8.42699	0.243415	0.477566	Not Detected
KHYF1001	H202308509	Non-pregnant	normal	147	86.6	29.1	2437.01	2372.76	76.9835	1.8116	0.919632	0.342405	Not Detected
KHYF1002	H202308513	Pregnant	normal	153	92	31.5	3086.11	2651.49	72.7126	239.81	1.2411	2.33847	Not Detected
KHYF1003	H202308534	Pregnant	α3.7/αα	127	85.6	29.1	3111.45	2897.82	82.4927	17.1165	0.852096	0.833388	Not Detected
KHYF1004	H202308541	Pregnant	normal	129	90.1	31.2	1966.47	1630.74	54.9131	23.4694	0.191234	0.578976	Not Detected
KHYF1005	H202308542	Pregnant	normal	145.8	93.1	30.8	816.219	730.932	23.2454	0.322995	0.465427	0.29708	Not Detected
KHYF1006	H202308558	Pregnant	normal	146	92.1	31.2	2815.91	2692.77	100.688	24.9317	0.253672	0.65635	Not Detected
KHYF1007	H202308560	Pregnant	normal	146	93.6	33.5	2620.11	2601.1	93.9662	15.8785	0.395808	0.774558	Not Detected
KHYF1008	H202308561	Pregnant	normal	126	91.1	31.1	2490.87	2247.33	69.3966	17.9902	0.373691	0.566159	Not Detected
KHYF1009	H202308568	Non-pregnant	normal	140	86.5	30	2578.27	2384.49	79.0126	5.54792	0.414103	0.420083	Not Detected
KHYF1010	H202308571	Pregnant	normal	139	91.6	30.6	2468.43	1861.43	62.3656	58.0633	0.886032	1.1621	Not Detected
KHYF1011	H202308578	Pregnant	normal	143	91.2	31.4	2830.25	2913.39	100.587	1.44114	0.985992	0.542657	Not Detected
KHYF1012	H202308584	Non-pregnant	normal	134	89.3	30.3	2799.97	2687.12	84.1339	2.46255	1.47714	0.341806	Not Detected
KHYF1013	H202308591	Pregnant	normal	145	88.4	31.1	2173.55	1727	58.3484	37.0843	0.568856	1.11488	Not Detected
KHYF1014	H202308592	Pregnant	normal	126	85.3	28.9	2029.48	1669.81	63.5256	5.87565	0.47161	0.436334	Not Detected
KHYF1015	H202308593	Pregnant	normal	135	85.4	28.2	2271	1833.93	55.8567	21.6271	0.836329	0.549472	Not Detected
KHYF1016	H202308598	Pregnant	normal	109	74	22.8	2446.41	2295.65	79.9451	15.8025	0.824796	0.431435	Not Detected
KHYF1017	H202308599	Non-pregnant	normal	143	89.6	29.8	2740.68	2455.34	89.8408	5.81333	1.0348	0.362726	Not Detected
KHYF1018	H202308601	Pregnant	normal	154	94.2	31.1	2451.23	2258.76	80.6314	13.6232	0.251286	0.595019	Not Detected
KHYF1019	H202308608	Non-pregnant	normal	146	91.6	30.7	3031.12	2811.83	97.6066	34.6901	0.251412	0.725814	Not Detected
KHYF1020	H202308623	Non-pregnant	normal	135	92.8	31.3	2255.59	2277.9	72.6604	12.93	0.223793	0.365856	Not Detected
KHYF1021	H202308626	Non-pregnant	normal	136	89.3	26.6	2242.72	2267.46	82.8135	15.2387	0.0695688	0.644629	Not Detected
KHYF1022	H202308636	Pregnant	normal	120	98.4	30.5	2400.57	2372.11	75.2826	12.162	0.114055	0.644747	Not Detected
KHYF1023	H202308638	Pregnant	normal	116	96.5	31.2	2456.54	2457.11	86.6628	22.3607	0.747415	1.34991	Not Detected
KHYF1024	H202308639	Non-pregnant	normal	162	90.4	30.3	2934.03	3172.4	91.6163	14.1609	1.65791	0.80919	Not Detected
KHYF1025	H202308640	Pregnant	normal	127	92.3	30.6	2284.77	2265.69	81.3961	7.53876	1.355	0.532585	Not Detected
KHYF1026	H202308653	Pregnant	normal	139	92.7	31.5	2939.26	2958.2	105.887	45.0288	0.269254	1.29204	Not Detected
KHYF1027	H202308660	Pregnant	normal	135	91.5	31.7	2099.59	2227.17	68.4082	8.00916	0.220592	0.410892	Not Detected
KHYF1028	H202308672	Pregnant	normal	132	94.7	31.7	2572.63	2559.89	82.239	7.22076	1.45547	0.511947	Not Detected
KHYF1029	H202308684	Pregnant	α3.7/αα	118	83.8	27.6	1908.9	1986.04	66.2933	0.001	0.19399	1.01165	Not Detected
KHYF1030	H202308685	Non-pregnant	normal	137	86	28.6	2039.08	2099.74	62.9027	1.84448	0.188983	0.318755	Not Detected
KHYF1031	H202308699	Pregnant	normal	144	93	31.2	2548.32	2247.06	73.675	24.5602	0.212512	0.576934	Not Detected
KHYF1032	H202308704	Non-pregnant	normal	117	95.5	32.8	2747.75	2526.68	80.0048	18.7344	0.869484	0.908942	Not Detected
KHYF1033	H202308718	Non-pregnant	normal	128	80	30	2394.85	2421.04	71.0565	4.60378	1.00951	0.372279	Not Detected
KHYF1034	H202308731	Pregnant	normal	120	91.9	28.4	2495.73	2158.73	69.4638	65.3265	0.204708	0.78551	Not Detected
KHYF1035	H202308736	Non-pregnant	normal	151	81.2	26.3	2838.91	2728.98	116.801	35.591	0.2111	0.582661	Not Detected
KHYF1036	H202308739	Pregnant	normal	85	75.1	21.7	2425.29	2377.45	71.3847	7.81343	0.194023	0.732252	Not Detected
KHYF1037	H202308740	Pregnant	normal	148	94.2	31.7	3207.63	3169.85	102.131	22.9744	2.28623	0.669101	Not Detected
KHYF1038	H202308742	Non-pregnant	normal	143	87.7	29.3	2696.8	2591.89	79.4714	13.1804	0.36183	0.344588	Not Detected
KHYF1039	H202308745	Pregnant	normal	128	89.8	31.1	2512.4	2459.87	72.6194	21.6461	0.632604	0.588285	Not Detected
KHYF1040	H202308748	Non-pregnant	normal	138	92	29.1	2761.93	2651.42	84.4696	4.48674	0.591805	0.421711	Not Detected
KHYF1041	H202308752	Pregnant	normal	125	90.3	31.2	2599.31	2341.85	71.3101	28.38	1.08024	0.674599	Not Detected
KHYF1042	H202308754	Pregnant	normal	147	91.2	30.7	2591.95	2784.53	78.0092	2.06384	0.679434	0.649801	Not Detected
KHYF1043	H202308762	Pregnant	normal	144	84.9	27.6	2028.58	2212.86	80.4636	8.01985	0.544925	0.924482	Not Detected
KHYF1044	H202308765	Pregnant	normal	123	90.7	31	2860.08	2650.1	87.1999	10.3938	0.782309	1.07818	Not Detected
KHYF1045	H202308772	Pregnant	normal	142	84.3	28.9	2479.43	2354.4	71.1274	4.40567	0.763804	0.921152	Not Detected
KHYF1046	H202308792	Non-pregnant	normal	143	94.3	32.3	3251.68	3173.36	120.606	19.5535	0.339637	1.0215	Not Detected
KHYF1047	H202308799	Pregnant	normal	121	92.4	30.8	2374.37	2234.79	73.757	5.59267	0.321644	0.79661	Not Detected
KHYF1048	H202308810	Pregnant	normal	147.6	88.9	29.1	1997.56	1828.69	69.2773	6.82133	0.822343	0.768046	Not Detected
KHYF1049	H202308812	Pregnant	normal	131	84	28.9	3336.79	2375.82	69.7547	4.76189	0.624145	0.824434	Not Detected
KHYF1050	H202308813	Pregnant	normal	130	88.9	29.4	2084.76	1794.86	60.6349	24.5151	1.48235	0.904872	Not Detected
KHYF1051	H202308814	Pregnant	normal	144.5	89.6	29.7	2389.37	1823.9	69.0423	11.2063	0.892164	0.864246	Not Detected
KHYF1052	H202308829	Pregnant	normal	137	87.2	30.2	2302.71	2319.21	92.7987	15.9177	0.386274	0.742294	Not Detected
KHYF1053	H202308832	Pregnant	normal	122	88.6	30.3	2358.11	2465.61	95.6074	15.8738	1.54039	1.11481	Not Detected
KHYF1054	H202308835	Pregnant	normal	130	87.9	30.7	2140.41	2186.34	72.7835	8.24526	0.324576	1.00085	Not Detected
KHYF1055	H202308840	Non-pregnant	β0/βN	127	73.1	23.5	2545.7	2464.8	178.805	157.052	0.917868	1.27916	Not Detected
KHYF1056	H202308841	Non-pregnant	normal	143	88.5	29.8	2689.08	2709.22	83.0895	19.189	1.32703	0.803344	Not Detected
KHYF1057	H202308842	Pregnant	normal	153	90.9	31.8	3322.04	3046.43	111.091	14.7224	0.341872	0.985754	Not Detected
KHYF1058	H202308846	Pregnant	normal	115	78.8	26.2	2260.74	2293.37	86.5062	40.0791	0.313698	1.31202	Not Detected
KHYF1059	H202308847	Non-pregnant	normal	107	72.7	23	2035.24	1960.81	45.7186	6.84305	0.597811	0.85211	Not Detected
KHYF1060	H202308849	Pregnant	normal	132	90.3	29.7	2498.51	2566.69	97.5358	5.63896	1.00951	0.940688	Not Detected
KHYF1061	H202308851	Pregnant	normal	121	70.4	21.7	2441.55	2518.69	86.8381	13.6731	0.492475	0.883708	Not Detected
KHYF1062	H202308860	Pregnant	--SEA/αα	112	72.2	22.02	2109.6	2201.33	72.5075	14.4114	22.176	1.96692	Not Detected
KHYF1063	H202308863	Non-pregnant	normal	155	85.9	30	2885.33	2724.9	83.8691	13.9971	1.16323	0.654352	Not Detected
KHYF1064	H202308867	Pregnant	normal	123	75.9	23.4	2070.83	2296.19	65.3459	7.36071	0.368222	0.861878	Not Detected
KHYF1065	H202308871	Pregnant	normal	137	85	29.6	2315.17	2313.73	77.3788	18.7142	0.35989	0.97828	Not Detected
KHYF1066	H202308872	Pregnant	normal	126	93.9	30	2554.2	2391.39	93.9251	40.2262	2.02457	1.15233	Not Detected
KHYF1067	H202308879	Pregnant	normal	140	94.1	31	2650.06	2592.33	95.7006	36.9857	0.435809	1.06937	Not Detected
KHYF1068	H202308887	Pregnant	normal	139	92.1	30.1	3213.72	2902.61	104.321	19.5713	0.001	0.897324	Not Detected
KHYF1069	H202308908	Pregnant	normal	134	88.5	30.2	3341.9	2833.02	87.282	4.08708	0.733396	0.813408	Not Detected
KHYF1070	H202308928	Non-pregnant	normal	141	90.1	31.1	3442.74	3163.9	87.1701	9.29457	0.126386	0.734206	Not Detected
KHYF1071	H202308931	Pregnant	normal	128	84.5	28.4	3116.84	2940.8	77.4348	5.59124	0.104362	0.713959	Not Detected
KHYF1072	H202308938	Pregnant	normal	128	86.4	30	2574.02	2480.37	85.611	22.445	0.380562	1.42568	Not Detected
KHYF1073	H202308943	Non-pregnant	normal	136	92.6	30.6	2646.67	2339.98	86.9687	24.2279	0.690892	0.759166	Not Detected
KHYF1074	H202308946	Pregnant	normal	155	92.9	31.4	3032.92	2519.71	79.863	25.9692	0.0845796	0.901024	Not Detected
KHYF1075	H202308948	Pregnant	normal	130	86.9	29.2	1847.53	1386.18	45.9872	18.4638	0.924084	0.692063	Not Detected
KHYF1076	H202308955	Pregnant	normal	119	97.5	32.8	3469.83	3091.72	101.587	19.5938	0.13802	0.911606	Not Detected
KHYF1077	H202308959	Pregnant	normal	105	74.1	20.8	2421.24	2217.72	58.6841	0.001	0.407358	0.96755	Not Detected
KHYF1078	H202308961	Non-pregnant	normal	140	91.8	30.4	3056.78	2727.92	103.951	191.89	1.039	2.1204	Not Detected
KHYF1079	H202308975	Pregnant	normal	125	89.9	20.9	2482.2	2225.4	72.8767	21.0799	0.185581	0.803418	Not Detected
KHYF1080	H202308977	Pregnant	normal	124	86.4	29	2514.93	2355.55	87.006	65.482	1.33484	0.874088	Not Detected
KHYF1081	H202308982	Pregnant	normal	111	94	30.4	2431.05	2086.31	83.1119	25.3258	1.84296	0.788322	Not Detected
KHYF1082	H202308984	Non-pregnant	normal	143	91.9	31.3	1782.27	1348.68	48.2103	2.1163	0.910476	0.437888	Not Detected
KHYF1083	H202308998	Pregnant	normal	122	89	29.8	2310.47	1802.99	61.5413	20.5078	0.988932	0.783216	Not Detected
KHYF1084	H202308999	Pregnant	α3.7/αα	139	88.4	27.4	2377.81	1936.37	54.1372	10.2611	1.77904	1.254	Not Detected
KHYF1085	H202309000	Pregnant	normal	131	93.3	31.3	2771.13	2258.25	72.4478	11.0491	0.18622	0.840048	Not Detected
KHYF1086	H202309001	Pregnant	normal	140.5	94.4	30.5	3057.51	2272.36	72.1046	34.5061	0.680484	0.92278	Not Detected
KHYF1087	H202309002	Pregnant	normal	118.9	71	22.6	2464.63	1953.23	53.2793	3.50011	0.001	0.79328	Not Detected
KHYF1088	H202309005	Pregnant	normal	145	91.5	31.7	3085.26	2645.13	82.1644	42.0412	0.001	1.19924	Not Detected
KHYF1089	H202309024	Pregnant	normal	152.3	82.9	31.4	2725.73	1967.04	63.5107	51.1811	0.123438	1.06035	Not Detected
KHYF1090	H202309025	Pregnant	normal	136.7	86.3	29	2518.37	2110.14	70.7022	22.0592	0.178013	0.521981	Not Detected
KHYF1091	H202309026	Pregnant	normal	129	80.5	35.4	2393.21	1989.44	63.0183	9.47831	0.001	0.680941	Not Detected
KHYF1092	H202309027	Pregnant	normal	135.3	88.7	29.5	2484.7	2093.01	62.8393	10.3719	0.940044	0.764642	Not Detected
KHYF1093	H202309038	Non-pregnant	normal	123	92.7	31.1	2848.51	2603.52	77.4684	13.3454	0.625884	0.749694	Not Detected
KHYF1094	H202309039	Pregnant	normal	139	99.5	33.2	2912.46	2642.28	91.7804	15.1271	1.46639	0.933658	Not Detected
KHYF1095	H202309040	Pregnant	normal	143	90.6	30.6	2283.18	1837.77	54.5326	5.26553	0.114064	0.851	Not Detected
KHYF1096	H202309050	Non-pregnant	normal	148	87.8	28.1	3574.64	2965.14	101.053	5.68454	0.818748	0.989972	Not Detected
KHYF1097	H202309062	Pregnant	α3.7/αα	135	93.6	32.1	2939.22	2773.24	91.3738	12.6878	2.88322	1.8204	Not Detected
KHYF1098	H202309065	Non-pregnant	normal	139	90.3	31.4	3047.87	2601.27	79.7437	10.1224	0.929544	0.704517	Not Detected
KHYF1099	H202309074	Pregnant	normal	121	88.5	30.3	2906.62	2459.08	83.2461	1.85148	0.900144	0.754134	Not Detected
KHYF1100	H202309079	Pregnant	normal	136	94.6	31.5	2599.1	2537.76	89.7587	35.3132	0.780704	1.12443	Not Detected
KHYF1101	H202309090	Non-pregnant	normal	147	95.7	31.4	3446.38	3173.83	93.4514	33.0769	0.132443	0.760276	Not Detected
KHYF1102	H202309105	Non-pregnant	normal	142	89.2	30.5	2557.14	2775.35	94.1004	9.02037	1.2658	0.83768	Not Detected
KHYF1103	H202309123	Pregnant	normal	121	89.7	31.2	3105.4	2679.91	74.3613	11.5037	0.42856	0.874828	Not Detected
KHYF1104	H202309130	Non-pregnant	normal	156	91.6	29.8	3475.88	3173.49	104.832	34.9239	1.49184	0.943278	Not Detected
KHYF1105	H202309139	Pregnant	normal	140	88.1	29.7	2996.55	2948	96.4205	20.4876	0.001	0.868464	Not Detected
KHYF1106	H202309142	Pregnant	normal	127	87.3	27.9	3015.26	2935.12	102.72	20.6063	0.001	0.994486	Not Detected
KHYF1107	H202309172	Pregnant	normal	143	91.2	31.4	3422.47	3258.39	83.5035	15.1236	0.126504	0.853294	Not Detected
KHYF1108	H202309175	Non-pregnant	normal	154	90.1	31	3522.38	3276.51	114.011	18.9979	0.418538	0.748806	Not Detected
KHYF1109	H202309178	Non-pregnant	normal	144	91.8	29.4	2994.87	2935.73	98.1736	11.8147	0.352128	0.875864	Not Detected
KHYF1110	H202309184	Pregnant	normal	139.4	87	31.84	2572.95	2029.6	60.8811	107.326	1.92083	2.22178	Not Detected
KHYF1111	H202309200	Pregnant	normal	117	96.1	31.9	2680.13	2342.19	80.1875	22.953	0.744878	1.01654	Not Detected
KHYF1112	H202309213	Pregnant	normal	138	90.3	29.7	2748.41	2665.94	99.6134	24.5341	1.37878	0.700151	Not Detected
KHYF1113	H202309214	Pregnant	normal	152	95.2	31.9	3210.29	2947.9	94.7569	10.7311	0.861756	0.893772	Not Detected
KHYF1114	H202309221	Pregnant	normal	122	91.6	31	3246.04	2886.5	102.62	51.739	0.240988	0.850704	Not Detected
KHYF1115	H202309240	Non-pregnant	normal	132	84.7	28.9	2780.2	2576.21	85.8646	48.9637	0.0433104	1.05065	Not Detected
KHYF1116	H202309250	Non-pregnant	α3.7/αα	131	88.4	28.2	2898.98	2839	90.9971	10.3566	0.880572	1.22507	Not Detected
KHYF1117	H202309254	Non-pregnant	normal	121	81.2	28.9	3014.2	2740.54	78.4643	7.61532	0.117768	0.79587	Not Detected
KHYF1118	H202309257	Pregnant	α3.7/αα	141	80	26.8	2657.74	2392.92	79.4677	14.2559	0.001	1.2745	Not Detected
KHYF1119	H202309259	Pregnant	normal	138	87.9	28.3	2233.33	2309.35	83.5072	13.7787	0.001	0.858178	Not Detected
KHYF1120	H202309265	Pregnant	normal	110	79.6	26.1	2472.93	2207.38	66.7521	4.47463	2.58426	2.45969	Not Detected
KHYF1121	H202309267	Non-pregnant	normal	151	87.9	30.4	3104.34	2918.02	77.1886	46.4022	0.495575	1.14234	Not Detected
KHYF1122	H202309269	Non-pregnant	normal	140	85.5	29	2844.96	2690.01	77.7332	17.4762	0.0795161	0.751766	Not Detected
KHYF1123	H202309288	Pregnant	normal	155	90.6	31.1	3626.94	3466.64	119.763	11.6039	1.60255	0.865504	Not Detected
KHYF1124	H202309294	Pregnant	normal	140	82.9	27.1	2294.49	1952.25	52.4811	4.94172	0.638434	0.783882	Not Detected
KHYF1125	H202309295	Pregnant	normal	13.17	91.7	30.3	1656.79	1275.51	38.6876	12.6237	0.109738	0.635379	Not Detected
KHYF1126	H202309312	Non-pregnant	normal	144	95.9	32.8	2994.87	2509.23	86.0921	159.723	2.94319	1.42702	Not Detected
KHYF1127	H202309321	Pregnant	normal	132	85.6	28.9	2943.6	2707.25	93.1493	26.8772	0.637543	1.03733	Not Detected
KHYF1128	H202309328	Pregnant	β0/βN	114	65	20.2	2701.13	2270.66	146.682	84.62	1.0642	1.0636	Not Detected
KHYF1129	H202309340	Non-pregnant	normal	136	95.8	32.5	3454.59	3063.33	94.7718	12.1846	1.95686	0.892662	Not Detected
KHYF1130	H202309349	Pregnant	normal	140.8	90.2	30.6	2253.47	1731.38	65.7151	9.88462	1.10015	0.789358	Not Detected
KHYF1131	H202309350	Pregnant	α3.7/αα	138.2	85.9	27	1795.67	1520.11	47.0502	10.032	0.001	1.25696	Not Detected
KHYF1132	H202309351	Pregnant	normal	153.8	88.8	30	2442.65	2003.04	68.3634	11.8997	1.17004	0.865652	Not Detected
KHYF1133	H202309352	Pregnant	normal	125	91	31	2521.02	1840.56	55.0473	3.38805	0.001	0.859362	Not Detected
KHYF1134	H202309353	Pregnant	normal	138	109.3	34.8	2495.44	1849.12	61.5189	53.2749	0.107755	1.07774	Not Detected
KHYF1135	H202309355	Pregnant	normal	140	92.9	29.3	2407.14	2168.59	71.0714	13.4463	1.43724	0.803418	Not Detected
KHYF1136	H202309356	Pregnant	α3.7/αα	143	86.6	28	1963.08	1516.06	49.5232	16.0257	0.001	1.08921	Not Detected
KHYF1137	H202309357	Pregnant	normal	151.6	94.5	31.7	2628.52	2210.68	70.5641	5.71814	0.001	0.730417	Not Detected
KHYF1138	H202309358	Pregnant	normal	116.1	91.9	30.1	1915.07	1670.25	52.6228	12.2831	0.511342	0.628438	Not Detected
KHYF1139	H202309372	Pregnant	normal	139	97.5	32.2	1596.73	1241.2	48.449	2.82613	0.140028	0.504784	Not Detected
KHYF1140	H202309373	Pregnant	α3.7/αα	112.4	79.5	27.4	1182.98	860.676	30.0198	0.93519	0.187463	0.756798	Not Detected
KHYF1141	H202309374	Pregnant	normal	104.6	87.4	28.4	1118.01	795.294	28.5819	0.112854	0.257384	0.457372	Not Detected
KHYF1142	H202309376	Pregnant	normal	118.6	97.2	32.3	1885.65	1452.82	44.9726	20.0247	0.368659	0.907462	Not Detected
KHYF1143	H202309377	Pregnant	normal	131	90.7	31.8	1979.71	1576.68	56.6997	21.1049	0.853356	0.747326	Not Detected
KHYF1144	H202309378	Pregnant	normal	135.3	93.5	30.4	1592.4	1137.4	41.7201	95.7755	0.738041	1.14685	Not Detected
KHYF1145	H202309379	Pregnant	normal	156.2	92.6	33.8	2731.45	2313.9	84.0555	50.0772	0.303929	1.5244	Not Detected
KHYF1146	H202309380	Pregnant	normal	153	88.9	31.4	1839.97	1503.17	51.3211	34.1654	0.226741	1.02719	Not Detected
KHYF1147	H202309381	Pregnant	normal	134.7	87.8	28.6	2430.27	1944.22	68.3149	13.3158	0.761796	0.670595	Not Detected
KHYF1148	H202309431	Non-pregnant	normal	142	92.5	32.3	2529.89	2554.69	86.9687	33.9791	2.11806	0.832722	Not Detected
KHYF1149	H202309444	Non-pregnant	normal	155	86	29.8	3519.39	2875.52	84.0406	4.9708	1.26479	0.838494	Not Detected
KHYF1150	H202309454	Pregnant	normal	146	85	28.9	3322.2	3167.75	94.1862	5.41474	1.80533	0.81104	Not Detected
KHYF1151	H202309459	Non-pregnant	normal	113	86.1	29.1	3096.78	2872.46	97.726	6.79546	2.72387	0.892736	Not Detected
KHYF1152	H202309467	Non-pregnant	--SEA/αα	121	73.6	22.2	2595.39	2331.07	65.4093	26.3929	39.4279	1.58286	Not Detected
KHYF1153	H202309468	Non-pregnant	normal	129	78.4	24.1	2995.45	2690.76	69.8293	31.9291	0.384485	0.893846	Not Detected
KHYF1154	H202309477	Non-pregnant	normal	140	87.8	31	3552.41	3361.31	94.8315	18.4187	1.25975	0.9324	Not Detected
KHYF1155	H202309481	Pregnant	normal	133	89.7	30.6	3218.17	2896.73	89.9415	67.3076	0.150755	1.73545	Not Detected
KHYF1156	H202309483	Pregnant	normal	136.3	95.7	31.8	2306.96	1919.4	74.4247	32.1736	0.627329	1.23728	Not Detected
KHYF1157	H202309484	Pregnant	normal	143.9	89.3	29.4	2716.54	2235.7	69.6727	13.8665	0.286532	0.712672	Not Detected
KHYF1158	H202309501	Non-pregnant	normal	151	87.3	29.8	2450.99	2535.35	89.382	10.964	0.839698	0.820956	Not Detected
KHYF1159	H202309518	Pregnant	normal	139	92.6	32.3	2508.31	2353.65	80.0085	35.521	0.749221	0.959632	Not Detected
KHYF1160	H202309522	Pregnant	normal	138	93.5	31.8	2899.96	2475.3	78.0801	16.7284	0.435994	1.11688	Not Detected
KHYF1161	H202309523	Pregnant	normal	136	95.2	31.6	2787.18	2395.91	74.1785	59.3239	0.740863	1.18733	Not Detected
KHYF1162	H202309534	Pregnant	normal	131	91.5	30.6	1947.59	1514.05	59.2734	24.286	0.155131	0.971694	Not Detected
KHYF1163	H202309543	Pregnant	normal	123	89.4	29.6	2054.69	1532.89	60.7132	14.0363	0.158348	0.680349	Not Detected
KHYF1164	H202309547	Non-pregnant	normal	140	85	30	2212.65	1819.34	68.1993	12.7994	0.379193	0.692522	Not Detected
KHYF1165	H202309550	Non-pregnant	normal	115	90	30.3	2313.62	1991.28	68.826	8.84137	0.778781	0.678262	Not Detected
KHYF1166	H202309553	Non-pregnant	normal	143	92	31.8	2925.29	2322.47	85.514	37.6516	0.887796	1.15188	Not Detected
KHYF1167	H202309555	Pregnant	normal	143	90	30	2526.05	2268.65	74.503	5.07276	0.583951	0.735886	Not Detected
KHYF1168	H202309557	Non-pregnant	normal	156	90	30.1	2153.57	1638.39	69.7249	18.9137	0.192083	0.703259	Not Detected
KHYF1169	H202309561	Pregnant	normal	141	88.8	31	2236.27	1891.45	64.9766	8.41607	0.440513	0.593391	Not Detected
KHYF1170	H202309563	Pregnant	normal	143	90.9	31.2	2477.59	2131.66	80.9559	18.7973	0.205607	0.727265	Not Detected
KHYF1171	H202309604	Pregnant	normal	151	85.2	29.1	2613	2296.7	74.9208	4.69601	0.167866	0.554001	Not Detected
KHYF1172	H202309616	Non-pregnant	normal	143	95.8	31.3	2513.14	2337.5	73.7421	12.0362	0.550738	0.62422	Not Detected
KHYF1173	H202309623	Non-pregnant	normal	137	85	27.4	2322.44	2083.04	74.9096	5.0057	0.138373	0.420794	Not Detected
KHYF1174	H202309625	Pregnant	normal	130	89	30	2604.38	2302.65	93.056	3.70902	1.04563	0.858622	Not Detected
KHYF1175	H202309626	Non-pregnant	normal	136	89.2	30.5	2360.6	2088.35	73.6899	44.5042	0.130049	0.85655	Not Detected
KHYF1176	H202309627	Pregnant	normal	113	92.5	30.5	2185.48	1806.96	70.5231	0.554744	0.493534	0.496829	Not Detected
KHYF1177	H202309629	Pregnant	normal	132	93	32	2589.54	2337.02	78.3151	2.86898	0.91308	0.580848	Not Detected
KHYF1178	H202309630	Pregnant	normal	143.5	94.73	31.86	2546.31	2191.61	69.8965	23.061	0.648052	0.903688	Not Detected
KHYF1179	H202309632	Pregnant	normal	140	88.3	29.6	2200.96	1941.77	65.1482	7.16461	0.146362	0.554364	Not Detected
KHYF1180	H202309637	Pregnant	α3.7/αα	133	87.7	28	2396.11	2043.06	74.1561	6.98644	1.69151	1.40726	Not Detected
KHYF1181	H202309651	Pregnant	βHb E/βN	133	74.2	24.9	2773.94	2545.24	109.229	58.8277	0.17876	0.703807	Detected
KHYF1182	H202309658	Non-pregnant	normal	151	85	29	3020.62	2674.81	105.335	15.0951	1.97568	0.83435	Not Detected
KHYF1183	H202309680	Pregnant	normal	142.3	88.7	27	2226.79	1821.48	59.9784	7.46457	0.724979	0.703651	Not Detected
KHYF1184	H202309681	Pregnant	normal	138	89.6	30.6	1969.08	1539.49	55.8045	40.2773	0.314479	0.90539	Not Detected
KHYF1185	H202309684	Pregnant	normal	142.8	89.9	29	2169.05	1581.78	57.442	81.7997	0.16821	1.33185	Not Detected
KHYF1186	H202309685	Pregnant	α3.7/αα	129.9	79.8	27	1947.88	1456.49	56.144	93.0834	0.199802	1.46409	Not Detected
KHYF1187	H202309686	Pregnant	normal	137.7	99	32.6	2220.95	1803.22	64.0739	33.0283	0.135828	0.979094	Not Detected
KHYF1188	H202309698	Pregnant	normal	138	94.3	30.9	2400.28	2087.91	65.8345	21.017	0.299435	0.838124	Not Detected
KHYF1189	H202309701	Pregnant	normal	133	98	33.9	2523.06	2153.25	70.87	8.29927	0.15871	0.612861	Not Detected
KHYF1190	H202309704	Non-pregnant	normal	154	91.6	31.4	2873.36	2529.94	88.3898	82.1606	2.34486	1.29626	Not Detected
KHYF1191	H202309707	Non-pregnant	α3.7/αα	140	87.1	28.6	2433.29	2199.46	65.5361	2.16354	0.12416	0.912198	Not Detected
KHYF1192	H202309712	Non-pregnant	normal	148	90.7	30	2510.11	2229.55	80.2248	0.001	1.0295	0.598667	Not Detected
KHYF1193	H202309736	Pregnant	normal	126	84.4	28.8	2550.2	2185.69	70.6984	2.23109	1.11308	0.486624	Not Detected
KHYF1194	H202309738	Pregnant	normal	128.7	89.1	29.5	1619.98	1283.87	52.3953	0.537343	0.143195	0.394538	Not Detected
KHYF1195	H202309739	Pregnant	normal	143	86.3	28.5	1907.63	1496.1	51.0637	8.26544	0.78619	0.600147	Not Detected
KHYF1196	H202309742	Pregnant	normal	136.3	93.8	31.7	1740.92	1326.34	52.6303	16.4186	0.658165	0.737417	Not Detected
KHYF1197	H202309750	Pregnant	normal	128	91.1	31.7	2785.79	2366.13	104.071	64.3093	0.208572	1.13412	Not Detected
KHYF1198	H202309755	Non-pregnant	normal	148	96.4	33.1	2490.42	2123.37	73.5892	12.8398	0.168042	0.73075	Not Detected
KHYF1199	H202309772	Non-pregnant	normal	140	90.4	29.7	2756.7	2394.48	90.6241	51.841	0.159407	0.885928	Not Detected
KHYF1200	H202309777	Pregnant	normal	145	88.9	29.7	2110.26	1650.39	61.8621	0.0399224	1.4091	0.575528	Not Detected
KHYF1201	H202309781	Non-pregnant	normal	130	90.2	31	1921.85	1565.33	60.8214	4.41861	0.179701	0.656772	Not Detected
KHYF1202	H202309788	Non-pregnant	normal	135	90.4	29.5	2405.59	2113.37	71.2728	11.5374	0.152981	0.499123	Not Detected
KHYF1203	H202309791	Pregnant	normal	153	91	31.4	2149.15	1895.33	68.1061	3.64658	0.133426	0.484582	Not Detected
KHYF1204	H202309792	Pregnant	α3.7/αα	130	84.6	27.4	1601.1	1275.54	41.0375	37.9199	0.543732	1.25585	Not Detected
KHYF1205	H202309793	Pregnant	normal	150	92.7	30.1	1624.88	1251.68	44.8495	2.32011	0.146689	0.437851	Not Detected
KHYF1206	H202309800	Non-pregnant	normal	111	76.6	25.2	2229.16	2002.16	62.0523	11.2007	0.228925	0.463677	Not Detected
KHYF1207	H202309801	Pregnant	normal	132	89.9	31.1	2569.11	2176.48	87.1514	23.2783	1.65698	0.681466	Not Detected
KHYF1208	H202309812	Non-pregnant	normal	143	89.4	29.7	3199.71	2856.68	90.68	2.7688	0.829097	0.451962	Not Detected
KHYF1209	H202309817	Pregnant	normal	153	94.7	30.9	2604.99	2532.93	80.609	9.88783	1.66312	0.623635	Not Detected
KHYF1210	H202309823	Non-pregnant	normal	161	94.8	31.9	3145.24	2941.44	96.2601	13.0938	0.19929	0.841158	Not Detected
KHYF1211	H202309828	Non-pregnant	normal	149	89.7	30.8	2497.61	2330.94	74.2046	10.8181	0.120658	0.680911	Not Detected
KHYF1212	H202309830	Non-pregnant	normal	159	88.4	30.2	2961.17	2593.04	89.4641	9.70135	1.07033	0.670462	Not Detected
KHYF1213	H202309834	Pregnant	normal	155	91.1	30.5	2617.25	2649.04	72.8805	7.28652	0.967176	0.633484	Not Detected
KHYF1214	H202309856	Pregnant	normal	121	87.8	29.4	2466.72	2204.08	76.6627	11.8044	1.10494	0.83176	Not Detected
KHYF1215	H202309859	Pregnant	normal	132	90.6	30.1	2280.31	1696.02	61.8098	6.64245	1.08133	0.874014	Not Detected
KHYF1216	H202309874	Pregnant	normal	126	90.9	30.1	2630.89	2202.66	77.4497	17.6388	0.122875	0.830354	Not Detected
KHYF1217	H202309877	Pregnant	normal	134	83.6	30.1	2714.29	2464.8	87.3417	8.01059	0.816052	0.611936	Not Detected
KHYF1218	H202309890	Pregnant	normal	126.5	91	29.2	1973.66	1585.39	61.2914	28.5948	1.26722	0.615036	Not Detected
KHYF1219	H202309891	Pregnant	normal	135.6	92.9	30.2	1138.52	858.058	30.7207	1.4866	0.371893	0.453198	Not Detected
KHYF1220	H202309892	Pregnant	normal	146	90.1	30.4	1435.25	1058.11	40.0826	7.89569	0.524597	0.638605	Not Detected
KHYF1221	H202309893	Pregnant	normal	143.9	83.4	28.2	1762.09	1329.37	41.9215	0.471892	0.187177	0.568468	Not Detected
KHYF1222	H202309894	Pregnant	α3.7/αα	132	82.9	26.4	2112.54	1568.52	58.3931	23.6177	0.149612	1.45092	Not Detected
KHYF1223	H202309910	Non-pregnant	normal	140	93.7	31.7	2358.32	2215.07	72.7201	23.6284	0.571746	0.791726	Not Detected
KHYF1224	H202309920	Pregnant	normal	132.5	86.9	28.7	2532.67	2283.34	88.4532	29.3106	0.727171	0.827246	Not Detected
KHYF1225	H202309925	Pregnant	normal	135	91.4	30.9	2300.5	2068.7	74.4657	18.9754	0.14842	0.916194	Not Detected
KHYF1226	H202309943	Pregnant	normal	122	99.7	33.8	2456.95	2071.01	78.6284	17.9937	0.143195	0.845302	Not Detected
KHYF1227	H202309951	Pregnant	normal	137	87.8	29.7	2238.47	1793.36	63.6226	3.65038	1.88328	0.582809	Not Detected
KHYF1228	H202309952	Pregnant	normal	143.9	90.8	30.1	2226.22	1756.71	59.6427	8.62379	0.660853	0.670322	Not Detected
KHYF1229	H202309953	Pregnant	normal	147	90.6	30.8	2178.25	1710.88	63.2459	38.9063	0.601062	0.980574	Not Detected
KHYF1230	H202309956	Pregnant	α3.7/αα	103	85.3	28.5	1978.24	1704.49	54.0663	9.34929	1.60028	0.985384	Not Detected
KHYF1231	H202309967	Pregnant	normal	123	92.6	31.8	2435.3	2226.22	68.8185	5.19016	0.211352	0.63694	Not Detected
KHYF1232	H202309971	Pregnant	normal	147	93.6	31.2	2586.93	2375.51	85.2417	5.82793	0.454474	0.717497	Not Detected
KHYF1233	H202309973	Pregnant	normal	146	91.7	30.2	2565.64	2347.09	74.5776	14.8541	1.2416	0.8917	Not Detected
KHYF1234	H202309979	Pregnant	normal	147	91.9	31.4	2453.11	2183.62	78.938	7.78067	0.936012	0.535146	Not Detected
KHYF1235	H202309980	Non-pregnant	normal	156	92.3	31.5	2473.99	2257.19	74.2792	3.4163	0.974988	0.627024	Not Detected
KHYF1236	H202309983	Non-pregnant	normal	158	92.8	32.3	2481.71	2182.87	81.0081	8.21428	0.215527	0.493854	Not Detected
KHYF1237	H202309987	Non-pregnant	normal	160	89.9	30	2407.23	2247.64	83.3842	37.3573	2.14519	0.830354	Not Detected
KHYF1238	H202309989	Pregnant	normal	150.6	95.6	31.3	1946.9	1548.19	51.8321	2.6241	0.16154	0.448418	Not Detected
KHYF1239	H202309990	Pregnant	normal	124	94.7	31.6	2179.1	1683.07	67.8636	21.9797	0.186698	0.801642	Not Detected
KHYF1240	H202309991	Pregnant	normal	172.7	86.8	29.6	1959.56	1557.68	52.8355	0.001	0.686742	0.524867	Not Detected
KHYF1241	H202309993	Pregnant	normal	141	90.1	29.4	1874.58	1407.87	51.8768	13.33	0.501875	0.771746	Not Detected
KHYF1242	H202309994	Pregnant	normal	138.2	96.9	31.1	2117.86	1683.88	64.2903	52.2968	0.874776	1.07359	Not Detected
KHYF1243	H202309995	Pregnant	normal	147	87.9	28.9	2150.46	1697.28	61.7613	21.4586	0.187883	0.676634	Not Detected
KHYF1244	H202309996	Pregnant	normal	142	88.3	29.7	2288.28	1759.94	67.4943	19.8205	0.790616	0.67377	Not Detected
KHYF1245	H202309997	Pregnant	normal	145	94.7	31.3	2408.12	2199.15	84.4248	3.07053	0.852096	0.661153	Not Detected
KHYF1246	H202310002	Pregnant	normal	134	92	30.9	2477.46	2247.13	83.1976	31.5576	0.140339	1.38328	Not Detected
KHYF1247	H202310005	Pregnant	normal	141	90	30.1	2855.42	2453.68	88.4383	8.21012	1.67378	0.550375	Not Detected
KHYF1248	H202310006	Pregnant	normal	128	93.7	32.5	2719.6	2441.03	82.1421	21.0693	0.797084	0.648025	Not Detected
KHYF1249	H202400015	Non-pregnant	βHb E/βN	161	82.5	26.1	2936.73	2615.35	119.196	44.3618	0.447854	0.511103	Detected
KHYF1250	H202400036	Non-pregnant	normal	154	90.2	30.2	2586.93	2304.62	81.5042	1.65871	0.732228	0.573049	Not Detected
KHYF1251	H202400041	Non-pregnant	normal	175	83.8	29.6	3058.7	2804.39	104.712	16.4399	0.152258	0.573182	Not Detected
KHYF1252	H202400053	Pregnant	normal	133	88.3	30	1699.69	1290.98	47.8596	9.08459	0.378126	0.418285	Not Detected
KHYF1253	H202400055	Pregnant	normal	137.5	89.3	29.3	2136.73	1649.34	58.7624	1.22926	0.73437	0.376172	Not Detected
KHYF1254	H202400056	Pregnant	normal	122.5	91.8	29.2	1165.41	873.528	33.4059	5.38578	0.612872	0.399778	Not Detected
KHYF1255	H202400057	Pregnant	normal	144.5	91.8	31.1	2106.66	1695.75	57.3599	17.9629	0.237644	0.637702	Not Detected
KHYF1256	H202400058	Pregnant	normal	135	87.3	29.2	1647.88	1272.76	42.2758	7.7174	0.793783	0.432833	Not Detected
KHYF1257	H202400061	Pregnant	normal	127	95.3	31.2	1482.03	1158.92	40.7092	3.123	0.140557	0.543508	Not Detected
KHYF1258	H202400062	Pregnant	normal	138.5	93.1	30.7	1843.07	1433.88	54.361	7.62458	0.279527	0.586354	Not Detected
KHYF1259	H202400063	Pregnant	normal	128.7	91	29.7	1976.4	1501.1	61.7539	0.001	0.141901	0.39738	Not Detected
KHYF1260	H202400089	Pregnant	normal	147	86.1	29.4	2633.22	2312.31	88.2182	11.2808	0.128612	0.60959	Not Detected
KHYF1261	H202400090	Pregnant	normal	161	85.2	29.4	2736.72	2342.94	85.693	27.631	1.64296	0.817922	Not Detected
KHYF1262	H202400098	Pregnant	normal	159	91.9	31.2	2975.38	2781.64	83.2014	12.714	0.195972	0.901468	Not Detected
KHYF1263	H202400117	Pregnant	normal	146	93.3	30.7	2634.9	2293.95	80.6836	10.4772	0.21294	0.693047	Not Detected
KHYF1264	H202400130	Pregnant	normal	126	90.6	31	2834.74	2713.91	107.036	20.8093	0.536869	1.14352	Not Detected
KHYF1265	H202400132	Non-pregnant	normal	155	90.9	32.2	2680.58	2559.83	96.1706	3.9971	0.200869	0.584082	Not Detected
KHYF1266	H202400200	Non-pregnant	normal	133	88.9	28.4	2969.58	2838.52	102.277	21.3862	0.921648	0.830576	Not Detected
KHYF1267	H202400202	Pregnant	normal	172	81	26.5	2482.45	2393.4	86.1257	6.97493	0.724718	0.691974	Not Detected
KHYF1268	H202400205	Non-pregnant	normal	117	97.4	33.8	2393.7	2229.31	78.9492	4.14477	0.0871332	0.602575	Not Detected
KHYF1269	H202400207	Pregnant	normal	145	86.2	28.5	2967.74	2749.92	101.635	3.26033	0.688968	0.74259	Not Detected
KHYF1270	H202400209	Pregnant	normal	133	88.1	30	2527.23	2387.24	81.0007	10.3924	0.533039	0.730373	Not Detected
KHYF1271	H202400210	Pregnant	normal	155	91.7	30.7	2579.86	2134.93	76.5433	9.27617	0.960792	0.882672	Not Detected
KHYF1272	H202400211	Pregnant	normal	118	86.9	28.1	2718.13	2545.68	89.8333	15.6447	0.094038	0.94942	Not Detected
KHYF1273	H202400220	Pregnant	normal	140	95.5	31	2965.25	2642.99	95.7081	16.7937	0.360133	1.15669	Not Detected
KHYF1274	H202400238	Pregnant	normal	146.3	91.7	29.7	2011.33	1639.96	64.9841	10.4744	1.46597	0.884892	Not Detected
KHYF1275	H202400239	Pregnant	normal	128	90.5	29.9	2568.3	2123.61	71.9815	33.1517	3.01896	0.972138	Not Detected
KHYF1276	H202400240	Pregnant	normal	130	92.5	30.1	2481.47	2103.24	73.8092	6.6434	0.657686	0.74	Not Detected
KHYF1277	H202400241	Pregnant	normal	136	90.4	29.4	1968.43	1667.02	57.4905	9.0669	0.443932	0.483753	Not Detected
KHYF1278	H202400254	Pregnant	normal	158	94.6	34.4	2705.95	2513.14	91.3104	8.1249	0.0578046	0.978132	Not Detected
KHYF1279	H202400255	Pregnant	normal	157	99.4	33.8	2576.22	2400.81	98.2258	7.62944	0.0626296	0.748362	Not Detected
KHYF1280	H202400259	Non-pregnant	normal	145	81.1	27.1	2451.97	2290.38	87.9198	8.82938	0.073033	0.728271	Not Detected
KHYF1281	H202400261	Non-pregnant	normal	141	94	31.4	2550.03	2459.08	75.7712	3.13985	0.864192	0.608709	Not Detected
KHYF1282	H202400264	Pregnant	βHb E/βN	138	80.8	26.7	2666.93	2520.49	130.087	9.33338	0.291102	0.514019	Detected
KHYF1283	H202400266	Pregnant	normal	118	73.5	23.8	2518.45	2427.74	72.5373	1.83035	0.476683	0.87838	Not Detected
KHYF1284	H202400272	Pregnant	normal	139	89	30.1	2862.65	2306.63	86.8195	7.20094	0.416254	0.649313	Not Detected
KHYF1285	H202400273	Pregnant	normal	132	87.1	30.2	2363.55	2171.48	82.9813	20.8592	0.355732	0.93166	Not Detected
KHYF1286	H202400274	Pregnant	normal	119	93.8	31.9	2027.15	1880.13	63.783	6.16219	0.697536	0.703888	Not Detected
KHYF1287	H202400289	Pregnant	normal	125	90.3	31.8	2522.41	2345.63	88.1101	39.628	0.370793	1.08232	Not Detected
KHYF1288	H202400307	Non-pregnant	normal	135	88.8	30.1	2513.87	2537.01	87.4014	2.52641	0.442907	0.706693	Not Detected
KHYF1289	H202400308	Non-pregnant	normal	122	73	23.6	2375.85	2137.68	60.9221	16.8613	0.10883	0.551966	Not Detected
KHYF1290	H202400323	Non-pregnant	normal	146	94.7	32.3	2829.6	2852.63	105.138	26.7395	1.36886	0.686861	Not Detected
KHYF1291	H202400324	Pregnant	normal	122	87.7	28.9	2403.75	2337.94	83.455	9.95394	0.0656998	0.569711	Not Detected
KHYF1292	H202400331	Pregnant	normal	146	87.9	30.4	2619.37	2500.33	86.9948	47.0206	0.531115	0.833758	Not Detected
KHYF1293	H202400332	Pregnant	normal	133	87.3	30.2	3066.58	2836.79	97.7931	33.9268	0.0460908	1.13523	Not Detected
KHYF1294	H202400333	Non-pregnant	normal	151	91.4	31	3130.82	2966.09	113.761	16.7462	1.3923	0.623583	Not Detected
KHYF1295	H202400335	Pregnant	normal	118	86.7	25.3	2175.02	1861.16	60.6684	0.001	0.0739721	0.576645	Not Detected
KHYF1296	H202400336	Pregnant	normal	131	87.5	31.3	2407.63	2002.12	77.0245	15.2779	0.927948	0.828726	Not Detected
KHYF1297	H202400340	Pregnant	normal	114	80.4	25.8	2078.38	1815.26	63.2123	3.75412	0.28943	0.875198	Not Detected
KHYF1298	H202400342	Non-pregnant	normal	140	90	31.5	2621.01	2521.92	95.212	4.43214	0.696116	0.524986	Not Detected
KHYF1299	H202400343	Pregnant	normal	139	93.9	30.6	3099.48	2998.56	107.476	23.4872	0.0562993	0.845894	Not Detected
KHYF1300	H202400345	Non-pregnant	normal	143	82.4	27	2883.57	2816.05	108.013	0.001	0.726802	0.5624	Not Detected
KHYF1301	H202400346	Pregnant	normal	128	94.8	32	2471.5	2409.72	86.8978	14.0849	0.0487494	0.747104	Not Detected
KHYF1302	H202400347	Non-pregnant	normal	142	87.7	29.1	3006.15	2904.18	105.111	30.9487	0.670404	0.877492	Not Detected
KHYF1303	H202400351	Non-pregnant	normal	146	89.7	29	2519.96	2352.97	82.6531	45.5998	0.718343	0.951344	Not Detected
KHYF1304	H202400374	Pregnant	normal	99	92.7	30.2	2022.28	1908.01	66.0359	0.477518	0.266423	0.763976	Not Detected
KHYF1305	H202400376	Non-pregnant	normal	157	86.2	30	2720.42	2528.65	91.0195	9.81245	0.0762863	0.639871	Not Detected
KHYF1306	H202400379	Non-pregnant	normal	142	95.2	32.6	2473.66	2305.2	83.4401	3.47969	1.4422	0.557686	Not Detected
KHYF1307	H202400380	Non-pregnant	normal	150	88.4	30.1	2529.19	2363.61	74.13	0.001	0.0463	0.446775	Not Detected
KHYF1308	H202400382	Pregnant	normal	145	82.2	28	2580.51	2351.98	88.7442	3.83009	0.281971	0.65974	Not Detected
KHYF1309	H202400404	Pregnant	normal	153	87.1	29.5	2619.94	2428.69	93.485	1.80839	0.0980448	0.568542	Not Detected
KHYF1310	H202400408	Pregnant	normal	146	90.8	29.3	2087.78	1696.67	61.8956	10.7395	1.0899	0.690457	Not Detected
KHYF1311	H202400409	Pregnant	normal	104	88.1	29.4	2159.66	1738.83	53.7642	29.0554	0.0991368	0.91686	Not Detected
KHYF1312	H202400410	Pregnant	normal	123	91.5	30.2	1743.9	1462.65	56.752	6.46405	0.508586	0.734502	Not Detected
KHYF1313	H202400412	Pregnant	normal	141.6	89.2	29.4	1801.07	1488.08	58.3484	14.8138	0.0324904	0.706345	Not Detected
KHYF1314	H202400425	Pregnant	normal	133	94.3	32.7	2739.87	2560.34	90.4935	50.3573	0.302686	1.25822	Not Detected
KHYF1315	H202400426	Non-pregnant	normal	159	95.7	31	2393.05	2122.21	80.8328	136.042	0.868896	1.55807	Not Detected
KHYF1316	H202400428	Pregnant	normal	144	88.3	29.6	2361.05	2223.12	95.999	18.4911	0.09849	0.75924	Not Detected
KHYF1317	H202400431	Non-pregnant	normal	135	94.7	31	2349.08	2176.85	72.0338	26.0665	1.83086	0.788988	Not Detected
KHYF1318	H202400432	Non-pregnant	normal	136	92.5	30.8	2479.22	2303.5	71.9405	3.38651	0.537667	0.752062	Not Detected
KHYF1319	H202400436	Pregnant	normal	136	91.8	30	2619.53	2517.56	86.2115	4.35142	0.831701	0.799126	Not Detected
KHYF1320	H202400438	Non-pregnant	normal	153	90.5	30.4	2773.99	2595.83	84.7531	28.0369	0.077049	0.708698	Not Detected
KHYF1321	H202400467	Pregnant	normal	163	91.3	35	3095.39	2934.06	103.623	18.9089	1.0269	0.991896	Not Detected
KHYF1322	H202400476	Non-pregnant	normal	144	89	29.9	2585.17	2484.07	90.4227	22.3417	0.111048	0.594139	Not Detected
KHYF1323	H202400477	Pregnant	normal	150	88.1	29.4	2901.02	2869.4	89.2738	16.2583	0.068959	1.32608	Not Detected
KHYF1324	H202400479	Pregnant	normal	146	92.3	30.4	2648.22	2541.36	88.6696	38.3721	1.11182	1.15891	Not Detected
KHYF1325	H202400490	Pregnant	normal	135	89.4	29.6	1869.14	1513.07	60.3178	0.393858	0.490132	0.487756	Not Detected
KHYF1326	H202400491	Pregnant	normal	132	90.5	29.3	1586.63	1277.72	49.8365	9.3405	0.140213	0.560602	Not Detected
KHYF1327	H202400492	Pregnant	normal	137	91	31.4	1906.28	1592.32	60.1425	0.0491299	0.512459	0.628401	Not Detected
KHYF1328	H202400493	Pregnant	normal	124	87.7	30.5	1819.99	1417.9	45.879	0.001	0.423696	0.598505	Not Detected
KHYF1329	H202400494	Pregnant	normal	125	81.9	27	2560.08	2521.13	86.0735	17.4513	1.3949	0.77404	Not Detected
KHYF1330	H202400498	Non-pregnant	normal	149	90.2	30.5	2863.84	2719.49	83.981	1.2708	1.50889	0.718925	Not Detected
KHYF1331	H202400499	Pregnant	normal	137	95.5	30.8	2074.42	1681.81	65.7562	19.7196	0.96768	0.798756	Not Detected
KHYF1332	H202400501	Non-pregnant	normal	151	89.5	31.1	2912.34	2396.63	78.3375	12.4136	0.726592	0.784104	Not Detected
KHYF1333	H202400510	Non-pregnant	normal	135	85.7	28.5	2926.56	2435.76	84.8053	4.43178	0.118818	0.48134	Not Detected
KHYF1334	H202400535	Pregnant	normal	132	91	29.1	1923.57	1505.45	48.9674	9.31285	0.571418	0.776482	Not Detected
KHYF1335	H202400540	Pregnant	normal	140	87.9	29.6	2817.54	2232.54	82.1943	18.8697	1.12081	1.04858	Not Detected
KHYF1336	H202400541	Non-pregnant	normal	149	94.9	31.4	2961.04	2480.74	79.5236	111.776	1.43741	2.109	Not Detected
KHYF1337	H202400548	Pregnant	normal	134	88.2	29.8	1938.23	1426.27	55.8829	3.92256	0.232621	0.732385	Not Detected
KHYF1338	H202400549	Pregnant	β0/βN	100	57.9	18.92	2612.3	1948.06	142.322	43.1427	0.653948	1.16876	Not Detected
KHYF1339	H202400550	Pregnant	normal	132	91.5	29.8	2857.75	2270.93	91.1985	10.2818	2.78737	0.674932	Not Detected
KHYF1340	H202400567	Pregnant	normal	129	90.8	28.2	2840.46	2746.11	100.382	57.1161	0.965412	1.29951	Not Detected
KHYF1341	H202400576	Pregnant	normal	118	95.9	33.1	2786.61	2432.43	79.2923	5.58187	0.746642	1.06863	Not Detected
KHYF1342	H202400584	Non-pregnant	normal	108	74.4	23.3	2545.99	2308.87	66.4873	10.4258	0.356941	0.649172	Not Detected
KHYF1343	H202400595	Pregnant	α3.7/αα	133	87.6	28.4	2252.86	1871.19	56.3155	11.7035	0.154325	1.33015	Not Detected
KHYF1344	H202400637	Non-pregnant	normal	133	89	31.1	2696.96	2473.77	85.8385	43.8798	1.74082	0.998112	Not Detected
KHYF1345	H202400642	Pregnant	normal	114	78.2	26.7	2701.42	2344.37	78.3561	1.67331	0.838572	0.689902	Not Detected
KHYF1346	H202400675	Pregnant	normal	132	91.6	30.1	1505.49	1193.16	40.6682	11.7096	0.676662	0.646849	Not Detected
KHYF1347	H202400695	Non-pregnant	normal	142	96.9	33	2650.38	2393.7	91.523	8.28645	0.500556	0.735871	Not Detected
KHYF1348	H202400696	Pregnant	normal	122	93.6	31.4	1630.89	1337.49	40.2616	11.7114	0.321586	0.725644	Not Detected
KHYF1349	H202400727	Pregnant	normal	123	94.9	31.5	2020.45	1749.5	54.8235	19.8395	0.621978	1.08336	Not Detected
KHYF1350	H202400728	Pregnant	normal	135	79.6	26.6	2177.96	1640.43	47.3822	18.1017	0.693	0.754134	Not Detected
KHYF1351	H202400745	Non-pregnant	normal	130	96	30.9	2776.23	2597.91	86.1518	19.6674	0.830844	0.981018	Not Detected
KHYF1352	H202400754	Pregnant	normal	142	89.1	28.8	2529.68	2441.44	90.0198	11.5407	0.704693	0.738098	Not Detected
KHYF1353	H202400758	Pregnant	normal	136	100	34.1	2757.52	2595.29	84.5255	20.3891	0.823838	0.90428	Not Detected
KHYF1354	H202400765	Non-pregnant	normal	119	92.9	31.2	2853.87	2647.48	86.7374	18.8626	0.826182	0.74851	Not Detected
KHYF1355	H202400766	Pregnant	normal	106	70.7	22.5	2412.01	2299.73	67.5279	0.88479	0.0632999	0.806008	Not Detected
KHYF1356	H202400776	Pregnant	normal	133	95.7	32.6	2666.52	2508.15	93.7797	22.3868	2.09227	0.79106	Not Detected
KHYF1357	H202400782	Pregnant	normal	116	80	25.2	2736.72	2541.36	83.4065	84.4859	0.263096	1.26266	Not Detected
KHYF1358	H202400785	Pregnant	normal	106	86.5	28.6	2204.19	2099.23	64.2381	31.4128	0.394439	0.922928	Not Detected
KHYF1359	H202400788	Pregnant	normal	120	96.7	32.6	2347.49	2178.75	76.5732	7.75978	0.696856	0.830206	Not Detected
KHYF1360	H202400790	Pregnant	normal	135	93	30.7	2953.24	2844.92	88.8038	21.1986	0.307028	0.904058	Not Detected
KHYF1361	H202400795	Non-pregnant	normal	134	89.9	32.9	2786.24	2508.45	75.1222	10.4404	0.527688	0.757982	Not Detected
KHYF1362	H202400797	Pregnant	normal	141	95.6	32.9	2802.75	2515.73	91.0157	44.5351	1.17919	1.52965	Not Detected
KHYF1363	H202400809	Pregnant	normal	118	92.7	29.9	2908.78	2711.23	84.4808	6.89457	0.395724	1.10245	Not Detected
KHYF1364	H202400821	Pregnant	βHb E/βN	146	76.9	25.2	2668.24	2271.4	88.0616	136.754	1.73233	1.3027	Detected
KHYF1365	H202400852	Pregnant	normal	153	85.4	28.9	2816.4	2777.56	106.495	43.0228	0.682987	0.802086	Not Detected
KHYF1366	H202400860	Pregnant	normal	134	91.1	30.7	2919.28	2769.78	107.521	75.854	0.409979	1.2227	Not Detected
KHYF1367	H202400863	Pregnant	normal	140	90.5	32.4	2859.38	2653.84	93.0448	89.3965	1.6238	1.89359	Not Detected
KHYF1368	H202400906	Non-pregnant	normal	160	94.6	32.2	4419.42	4053.48	128.446	15.2221	0.120817	0.632811	Not Detected
KHYF1369	H202400911	Non-pregnant	normal	134	93.1	31.7	3090.12	2813.87	96.5399	56.8692	0.91434	1.40274	Not Detected
KHYF1370	H202400914	Pregnant	normal	144	88.1	29.9	3732.72	3429.92	130.487	7.80286	0.17204	0.633751	Not Detected
KHYF1371	H202400950	Pregnant	normal	155	91.6	32.6	3179.4	2890.65	97.3493	9.40971	0.842184	0.689214	Not Detected
KHYF1372	H202400952	Pregnant	normal	143	92.4	30.8	4008.49	3253.26	128.86	77.155	0.804115	1.13412	Not Detected
KHYF1373	H202400954	Pregnant	normal	129	74.9	23.5	3359.8	2818.6	90.5942	12.3044	0.5859	0.835312	Not Detected
KHYF1374	H202400956	Pregnant	normal	139	91.3	30.2	4363.85	3697.16	161.419	41.7017	0.204204	1.07951	Not Detected
KHYF1375	H202400964	Pregnant	normal	134	84.1	28.8	2426.84	1889.99	72.5783	0.827659	0.132082	0.594124	Not Detected
KHYF1376	H202400977	Pregnant	normal	105	71.5	23.5	2728.43	2378.37	74.3501	14.4387	0.302988	0.797942	Not Detected
KHYF1377	H202400980	Pregnant	normal	128	95.7	30.3	3109.16	2753.97	103.314	38.7472	0.135954	0.913086	Not Detected
KHYF1378	H202400992	Pregnant	normal	133	87.9	29	3459.62	2945.15	112.553	29.9563	0.98742	0.817034	Not Detected
KHYF1379	H202400997	Pregnant	normal	154	91.5	30.4	3016.24	2636.9	93.2015	36.9739	0.594896	0.89244	Not Detected
KHYF1380	H202400998	Non-pregnant	normal	143	88.1	29.9	3528.63	3018.86	105.522	12.9715	0.192352	0.956006	Not Detected
KHYF1381	H202401004	Pregnant	normal	112	81.6	26.4	2991.07	2560.17	84.0817	17.5344	0.529435	1.38136	Not Detected
KHYF1382	H202401014	Pregnant	normal	138	88.6	29.1	3518.09	3084.48	103.847	18.2204	0.824536	0.84286	Not Detected
KHYF1383	H202401127	Pregnant	normal	134	88.8	30.3	2972.73	2784.19	88.401	3.13048	0.11839	0.65584	Not Detected
KHYF1384	H202401148	Pregnant	normal	129	96.4	33.2	2910.62	2545.92	88.4532	19.3398	0.14915	0.963554	Not Detected
KHYF1385	H202401152	Pregnant	normal	122	90.5	30.6	2721.73	2371.91	76.879	6.3038	0.52012	0.560528	Not Detected
KHYF1386	H202401157	Pregnant	normal	115	95.4	32	2885.41	2619.84	90.1317	17.8121	1.05134	0.864468	Not Detected
KHYF1387	H202401159	Pregnant	normal	134	88.6	29.6	3296.75	2905.64	104.5	25.9039	0.264256	0.83065	Not Detected
KHYF1388	H202401160	Pregnant	normal	140	100.1	34.8	3095.55	2815.74	100.318	41.9711	0.309758	0.840418	Not Detected
KHYF1389	H202401161	Non-pregnant	normal	144	93.2	29.5	3296.18	3082.3	106.353	7.30527	0.108394	0.747696	Not Detected
KHYF1390	H202401163	Pregnant	normal	120	89.5	30.1	3060.45	2636.63	89.5536	8.09926	0.231361	0.723801	Not Detected
KHYF1391	H202401188	Non-pregnant	normal	144	90.3	29.8	3109.08	2804.42	103.273	44.0603	1.18348	0.81289	Not Detected
KHYF1392	H202401189	Pregnant	normal	144	93.5	31.3	2805.37	2589.07	89.6878	41.2304	0.742384	1.01025	Not Detected
KHYF1393	H202401198	Pregnant	normal	84	61.8	20.5	2282.89	2132.68	56.3678	1.79759	0.188958	0.604639	Not Detected
KHYF1394	H202401201	Pregnant	normal	125	92.3	30.2	2922.76	2631.91	99.4306	31.8816	0.851508	1.01965	Not Detected
KHYF1395	H202401205	Non-pregnant	normal	152	95.6	33.1	3088.16	2589.78	101.497	51.6891	1.86077	0.969622	Not Detected
KHYF1396	H202401264	Non-pregnant	normal	145	92.3	30.3	3528.91	2984.52	109.655	224.094	0.594518	1.85858	Not Detected
KHYF1397	H202401267	Non-pregnant	normal	145	83	28.7	3207.31	2914.45	92.1832	20.6942	1.03345	0.883634	Not Detected
KHYF1398	H202401274	Non-pregnant	normal	136	86.8	29.4	3498.96	3026.27	110.386	17.3302	0.166253	0.762644	Not Detected
KHYF1399	H202401276	Pregnant	normal	148	86.6	28.7	3015.92	2627.01	79.4788	342.473	0.657854	3.43131	Not Detected
KHYF1400	H202401353	Pregnant	normal	154	89.5	29.7	3911.12	3394.66	118.189	13.2493	0.208505	0.786842	Not Detected
KHYF1401	H202401357	Non-pregnant	normal	145	85.6	30.3	3278.4	2894.18	106.797	14.6405	0.189806	0.610337	Not Detected
KHYF1402	H202401360	Non-pregnant	normal	128	91.3	30.8	3578.89	3016.41	100.169	42.2014	0.226019	0.780848	Not Detected
KHYF1403	H202401392	Pregnant	normal	126.6	97.4	32.1	1169.41	799.102	34.7494	10.4342	0.490879	0.387383	Not Detected
KHYF1404	H202401393	Pregnant	normal	133.1	91.1	37.4	2488.78	1845.45	70.5753	7.65437	2.22541	0.67044	Not Detected
KHYF1405	H202401394	Pregnant	normal	117	70.1	22.2	2434.48	1772.39	50.9854	5.85144	0.181868	0.822658	Not Detected
KHYF1406	H202401404	Non-pregnant	normal	130	85.8	28.4	2295.72	1859.97	74.5403	14.8838	0.190705	0.753394	Not Detected
KHYF1407	H202401411	Pregnant	normal	135	88.4	29.7	3048.24	2745.26	88.3935	9.72913	0.781234	0.81992	Not Detected
KHYF1408	H202401416	Pregnant	normal	113	87.1	27.5	2864.82	2721.19	82.1868	33.5375	0.509485	0.833462	Not Detected
KHYF1409	H202401425	Pregnant	normal	144	92.6	30.6	2791.88	2678.96	81.6795	4.06939	0.561826	0.512117	Not Detected
KHYF1410	H202401427	Pregnant	normal	141	98.5	33.1	3089.87	2591.45	100.885	227.655	0.896364	2.80993	Not Detected
KHYF1411	H202401428	Pregnant	normal	146	89	31	2789.55	2575.33	84.5852	84.6746	0.939792	1.27147	Not Detected
KHYF1412	H202401431	Pregnant	normal	140	89.1	31.1	3314.4	3180.73	102.426	63.5508	0.610302	1.42768	Not Detected
KHYF1413	H202401433	Non-pregnant	--SEA/αα	111	74.5	23	2630.85	2628.68	75.9801	2.99053	26.7826	1.3596	Not Detected
KHYF1414	H202401437	Pregnant	normal	138	93.4	30.3	3146.59	2949.84	98.9159	8.87413	0.574241	0.723417	Not Detected
KHYF1415	H202401443	Non-pregnant	normal	128	87.6	28.9	2989.2	2937.43	97.4052	34.4705	2.30303	0.787508	Not Detected
KHYF1416	H202401454	Pregnant	normal	145	82.2	28.7	2489.07	2202.04	76.5284	49.6451	0.136366	0.876826	Not Detected
KHYF1417	H202401459	Pregnant	normal	159	90.2	30.5	2809.37	2587.81	88.8635	1.19626	1.1587	0.596203	Not Detected
KHYF1418	H202401464	Pregnant	normal	142	90.2	30.3	2566.74	2387.92	84.104	5.73914	0.0947016	0.633581	Not Detected
KHYF1419	H202401466	Pregnant	normal	134	90	29.8	2159	1944.26	76.4799	1.79356	0.0647237	0.51706	Not Detected
KHYF1420	H202401468	Pregnant	βHb E/βN	136	82.4	26.2	2904.37	2793.2	111.329	112.157	0.0972048	1.31084	Detected
KHYF1421	H202401469	Pregnant	normal	136	91.2	30.7	2528.87	2453.37	82.336	7.17233	0.398219	0.871128	Not Detected
KHYF1422	H202401491	Non-pregnant	normal	152	91.6	31.9	2944.04	2854.1	104.794	47.0301	1.54207	0.933214	Not Detected
KHYF1423	H202401513	Non-pregnant	α3.7/αα	137	86.5	28.5	2914.99	2663.49	91.1799	9.83809	0.11865	1.0471	Not Detected
KHYF1424	H202401514	Pregnant	normal	130	90.4	31.3	2609.61	2409.95	89.0761	10.7934	0.0975828	0.854478	Not Detected
KHYF1425	H202401520	Non-pregnant	normal	140	91.3	30.4	3005.17	2734.11	94.0445	4.27498	0.0787366	0.48763	Not Detected
KHYF1426	H202401523	Pregnant	normal	94.9	64.4	20.8	2351.86	2318.56	52.3767	4.09741	0.19	0.662196	Not Detected
KHYF1427	H202401525	Pregnant	normal	135	89.3	30.8	2704.28	2535.58	88.1063	18.4139	0.0834246	0.946904	Not Detected
KHYF1428	H202401536	Pregnant	normal	142	94.1	32.1	2796.99	2532.9	80.8925	27.1823	0.134971	0.846856	Not Detected
KHYF1429	H202401547	Non-pregnant	α3.7/αα	133	86	27.5	2495.08	1946.64	62.153	4.97733	0.184708	1.47245	Not Detected
KHYF1430	H202401550	Pregnant	normal	133	88.3	29.7	2422.75	1876.9	73.3579	25.8742	1.43161	0.938024	Not Detected
KHYF1431	H202401578	Non-pregnant	normal	154	93.9	32.2	3297.81	3086.66	107.618	28.2565	1.40078	0.821104	Not Detected
KHYF1432	H202401580	Non-pregnant	normal	151	94	31.3	3688.06	3446.92	111.695	21.0811	0.221315	0.774632	Not Detected
KHYF1433	H202401582	Pregnant	--SEA/αα	131	69.9	22.3	2842.75	2693.58	85.7303	27.1954	38.2385	1.94894	Not Detected
KHYF1434	H202401584	Non-pregnant	normal	170	86	30.5	3537.5	3027.26	102.292	23.9026	1.72897	0.765308	Not Detected
KHYF1435	H202401619	Non-pregnant	normal	143	93.2	31.5	3108.55	3135.07	112.862	7.35002	0.670009	0.598638	Not Detected
KHYF1436	H202401631	Pregnant	normal	117	98.9	32.1	3039.78	2889.46	91.937	14.0648	0.59183	1.06368	Not Detected
KHYF1437	H202401639	Non-pregnant	normal	138	95.2	31.2	2244.11	2119.02	72.5671	33.6443	0.386988	0.919672	Not Detected
KHYF1438	H202401647	Non-pregnant	normal	142.9	88.9	29.6	3791.64	3483.64	129.908	15.5366	0.241475	0.601886	Not Detected
KHYF1439	H202401654	Pregnant	normal	133	91	31.5	3175.11	2809.59	113.168	53.9135	1.87522	1.04273	Not Detected
KHYF1440	H202401656	Pregnant	normal	129	91.4	30.9	3651.17	3175.67	112.497	66.91	1.1718	1.2227	Not Detected
KHYF1441	H202401729	Non-pregnant	α3.7/αα	143	81.6	26.3	3176.95	2815.91	88.3898	9.92047	0.2804	1.0505	Not Detected
KHYF1442	H202401748	Pregnant	normal	138	89.9	30.9	3773.54	3306.67	116.764	65.8453	0.578525	1.15914	Not Detected
KHYF1443	H202401749	Pregnant	β0/βN	119	65.6	21.6	2779.01	2239.68	159.129	161.99	0.0559415	1.17475	Not Detected
KHYF1444	H202401762	Pregnant	normal	130	91	30.9	3220.5	2644.32	96.5249	34.6058	3.00149	0.844932	Not Detected
KHYF1445	H202401774	Pregnant	normal	117.1	94.3	32	2649.93	2123.57	37.7625	72.826	0.000376782	1.35849	Not Detected
KHYF1446	H202401775	Pregnant	normal	134.4	89.1	29.9	2458.51	2109.6	85.7005	18.7415	0.0469846	0.630354	Not Detected
KHYF1447	H202401777	Pregnant	normal	122.8	91.6	30.5	2717.52	2221.56	78.7701	9.25195	0.001	0.668472	Not Detected
KHYF1448	H202401782	Pregnant	normal	131	91.3	30.8	2830.58	2401.66	73.0222	9.96486	0.616358	0.693528	Not Detected
KHYF1449	H202401783	Pregnant	normal	137	84.7	28	3279.91	2773.45	49.1353	44.8413	1.86564	0.85914	Not Detected
KHYF1450	H202401785	Pregnant	normal	118	84.2	28.2	2611.4	2309.72	96.0736	20.1588	0.357168	0.626869	Not Detected
KHYF1451	H202401787	Non-pregnant	normal	109	84.7	27.9	3102.25	2630.82	95.391	48.2765	0.0161036	1.01395	Not Detected
KHYF1452	H202401789	Pregnant	normal	131	86.9	29.5	2620.8	2302.07	75.0625	3.375	1.61557	0.80623	Not Detected
KHYF1453	H202401790	Pregnant	α3.7/αα	110	96	26.7	2980.12	2546.84	98.6324	16.2738	0.001	0.532918	Not Detected
KHYF1454	H202401795	Pregnant	normal	142	99.5	33.4	3145.73	2702.59	88.36	45.4443	0.599684	1.2005	Not Detected
KHYF1455	H202401796	Non-pregnant	normal	129	88.4	29.4	2710.33	2269.98	83.7907	20.2099	0.426821	0.633544	Not Detected
KHYF1456	H202401802	Non-pregnant	normal	144	91.8	29	3407.76	3119.98	99.2628	8.15279	0.251647	0.620912	Not Detected
KHYF1457	H202401803	Non-pregnant	normal	134	84.3	26.6	3029.4	2794.46	93.3544	21.7506	0.001	0.474029	Not Detected
KHYF1458	H202401806	Non-pregnant	normal	123	80.6	24.4	2867.06	2514.84	74.1263	45.9642	0.380377	0.780996	Not Detected
KHYF1459	H202401807	Non-pregnant	normal	143	92.3	30.2	3639.24	3279.98	111.602	19.7814	0.001	0.578591	Not Detected
KHYF1460	H202401808	Non-pregnant	normal	147	85	28.8	3921.25	3482.28	118.457	12.0943	0.0309515	0.720767	Not Detected
KHYF1461	H202401809	Non-pregnant	normal	142	85.2	28	3520.91	3233.74	113.754	10.5979	0.001	0.52429	Not Detected
KHYF1462	H202401812	Non-pregnant	normal	151	96.3	29.8	3759.04	3234.25	120.729	15.069	1.65505	0.604321	Not Detected
KHYF1463	H202401813	Non-pregnant	normal	153	90.4	29.3	3063.64	2678.32	76.1218	4.84854	0.001	0.489406	Not Detected
KHYF1464	H202401816	Pregnant	normal	149.9	89.5	30	2124.97	1808.63	69.1952	6.44517	0.611822	0.482066	Not Detected
KHYF1465	H202401818	Pregnant	normal	133	92.3	31.1	3007.95	2536.64	90.9337	18.5362	0.984396	0.658681	Not Detected
KHYF1466	H202401819	Pregnant	normal	150	84.5	28.7	2785.59	2409.92	90.2212	8.2265	1.2143	0.554526	Not Detected
KHYF1467	H202401820	Pregnant	normal	143	89.2	30.3	2949.23	2523.99	98.3974	14.8209	0.81212	0.653287	Not Detected
KHYF1468	H202401824	Pregnant	normal	122	91.5	31.6	3025.64	2764.64	93.3992	16.2132	0.616056	1.07322	Not Detected
KHYF1469	H202401825	Pregnant	normal	137	88.5	30.9	3339	2950.72	122.601	17.2922	0.732278	0.805342	Not Detected
KHYF1470	H202401827	Pregnant	normal	110	101.3	34.5	2560.61	2202.76	89.8855	14.4078	0.132888	0.518888	Not Detected
KHYF1471	H202401833	Pregnant	normal	142	91.4	30.5	3322.29	2848.28	100.311	6.31567	1.1408	0.671032	Not Detected
KHYF1472	H202401845	Non-pregnant	normal	137	90.3	31.5	3210.04	2835.87	102.59	17.4643	0.785963	0.59587	Not Detected
KHYF1473	H202401870	Pregnant	normal	129	95.1	31.8	3084.24	2881.26	107.383	12.1394	0.745525	0.618433	Not Detected
KHYF1474	H202401876	Pregnant	normal	135	80.5	28.2	2927.25	2660.74	97.0322	27.555	0.618358	0.723313	Not Detected
KHYF1475	H202401891	Non-pregnant	normal	138	89.7	30.1	2998.14	2771.71	86.5024	51.5953	1.5692	0.85322	Not Detected
KHYF1476	H202401907	Pregnant	normal	138.2	94.2	31.5	2526.46	2063.15	71.9517	8.41607	0.785988	0.59923	Not Detected
KHYF1477	H202401908	Pregnant	normal	133.7	89.9	29.7	2414.38	1952.82	68.9677	30.1462	0.001	0.73812	Not Detected
KHYF1478	H202401909	Pregnant	normal	139.1	91.2	30.1	2396.68	1962.75	58.5349	21.3957	0.001	0.817774	Not Detected
KHYF1479	H202401914	Non-pregnant	normal	155	88	30.5	3313.5	3012.94	100.307	15.4263	1.64002	0.620742	Not Detected
KHYF1480	H202401917	Non-pregnant	normal	158	89.5	30.9	3522.74	3221.91	93.9774	2.96382	0.213814	0.568342	Not Detected
KHYF1481	H202401919	Pregnant	normal	138	96.8	33.2	3009.3	2720.65	84.7904	84.6117	0.551821	1.06671	Not Detected
KHYF1482	H202401921	Pregnant	normal	132	95.4	30.6	3284.29	3048.44	108.345	22.61	0.489258	0.783142	Not Detected
KHYF1483	H202401928	Non-pregnant	normal	151	88.6	28.8	3308.11	3028.14	95.156	11.8644	0.906528	0.680082	Not Detected
KHYF1484	H202401942	Pregnant	normal	159	89.2	29.7	3381.61	3226.23	97.1106	12.346	0.638803	0.924926	Not Detected
KHYF1485	H202401952	Pregnant	normal	134	93.5	30.1	2972.03	2834.65	96.7487	10.6951	0.110468	0.577119	Not Detected
KHYF1486	H202401964	Pregnant	βHb E/βN	127	76.4	24.3	3034.14	2769.54	114.578	20.0366	0.452466	0.477855	Detected
KHYF1487	H202401966	Pregnant	α3.7/αα	105	69	19.6	2252.33	1900.29	50.8511	0.0587648	0.001	0.592266	Not Detected
KHYF1488	H202401967	Pregnant	normal	136	96.5	32	2723.28	2338.72	67.6212	68.1623	0.239677	0.939578	Not Detected
KHYF1489	H202401980	Non-pregnant	β0/βN	114	92.2	19.6	2817.09	2546.5	185.523	32.246	0.516676	0.567706	Not Detected
KHYF1490	H202401998	Pregnant	normal	147	89.7	29.6	3249.27	3091.18	97.3157	28.4833	0.693748	0.846042	Not Detected
KHYF1491	H202402001	Pregnant	normal	142	92	32.7	3054.73	2773.52	101.035	24.9531	0.759032	0.802826	Not Detected
KHYF1492	H202402004	Non-pregnant	normal	150	95.3	32	3590.49	3409.86	109.073	1.5253	0.001	0.564021	Not Detected
KHYF1493	H202402009	Non-pregnant	normal	130	90.4	27.7	3053.51	2785.76	89.05	21.9464	0.358806	0.562785	Not Detected
KHYF1494	H202402010	Pregnant	normal	112	92	28.8	2635.92	2454.6	88.5763	11.3692	0.001	0.519154	Not Detected
KHYF1495	H202402011	Pregnant	normal	154	88.2	29.7	2864	2635.78	88.4942	11.959	0.001	0.59957	Not Detected
KHYF1496	H202402016	Non-pregnant	normal	126	77.3	24.8	2993.49	2799.08	84.1302	1.89077	0.49397	0.762644	Not Detected
KHYF1497	H202402066	Pregnant	normal	132	92.5	33	2890.76	2713.2	95.2828	7.1588	0.001	0.458312	Not Detected
KHYF1498	H202402075	Pregnant	normal	152	88.2	30.3	2866.12	2600.69	87.0246	12.6867	0.45113	0.79698	Not Detected
KHYF1499	H202402092	Non-pregnant	normal	148	97.5	33.3	2427.04	2254.1	67.6212	11.5564	0.001	0.601243	Not Detected
KHYF1500	H202402097	Pregnant	normal	138	89.5	30.5	2722.42	2453.88	86.9575	14.7034	0.446544	0.622577	Not Detected
KHYF1501	H202402122	Pregnant	normal	133.6	93	31.2	2025.96	1554.11	46.4198	7.96691	0.302492	0.48894	Not Detected
KHYF1502	H202402156	Pregnant	normal	139	93	30.4	2930.72	2614.29	87.5431	5.67362	0.683726	0.872978	Not Detected
KHYF1503	H202402169	Non-pregnant	normal	144	84.6	29.3	3132.57	2783.92	104.451	66.9919	1.97534	0.825618	Not Detected
KHYF1504	H202402171	Non-pregnant	normal	143	90.8	31.2	3237.54	2838.52	94.41	0.439475	1.20456	0.536019	Not Detected
KHYF1505	H202402175	Pregnant	α3.7/αα	142	88.5	28.2	3163.87	2972.48	97.5656	5.45415	3.05819	1.47112	Not Detected
KHYF1506	H202402185	Pregnant	normal	112	66.1	20.3	3478.08	3287.05	116.175	9.41623	0.940044	0.55053	Not Detected
KHYF1507	H202402192	Non-pregnant	normal	145	87.1	28.4	3271.78	2967.79	95.2344	4.74432	0.001	0.39496	Not Detected
KHYF1508	H202402198	Pregnant	normal	123	90.4	31.2	2848.51	2542.59	85.9541	19.1333	0.001	0.570836	Not Detected
KHYF1509	H202402201	Pregnant	normal	127	90.9	30	2833.97	2685.69	85.3312	11.6747	0.216955	0.639678	Not Detected
KHYF1510	H202402251	Non-pregnant	normal	146	97.3	33.3	3171.72	3016.41	100.486	24.4605	1.03807	0.597883	Not Detected
KHYF1511	H202402274	Non-pregnant	normal	126	86.3	29.2	3260.34	2788.51	91.0306	0.001	0.001	0.493832	Not Detected
KHYF1512	H202402277	Pregnant	normal	136	90.5	31.4	3129.67	2617.52	83.9325	11.2542	0.001	0.811262	Not Detected
KHYF1513	H202402280	Non-pregnant	normal	137	92.7	30.4	2992.22	2603.55	90.6204	4.91347	0.459304	0.61827	Not Detected
KHYF1514	H202402284	Pregnant	normal	120	88.4	29	2850.43	2460.95	90.9822	27.6832	0.0407392	0.770118	Not Detected
KHYF1515	H202402291	Pregnant	normal	148	89.1	30.5	3227.9	2809.52	93.291	8.90938	0.904596	0.568401	Not Detected
KHYF1516	H202402316	Non-pregnant	normal	160	93.9	31.7	2668.2	2358	81.6833	13.5271	0.593704	0.42032	Not Detected
KHYF1517	H202402321	Pregnant	normal	130	92.4	30.7	2837.65	2618.92	89.4976	36.2842	0.907872	0.90872	Not Detected
KHYF1518	H202402329	Non-pregnant	normal	117	82.5	25.7	2630.08	2338.35	78.5128	8.04667	0.001	0.501476	Not Detected
KHYF1519	H202402352	Non-pregnant	normal	140	92.7	31.4	3070.67	2649.89	87.2372	62.276	0.01879	1.1766	Not Detected
KHYF1520	H202402370	Pregnant	β0/βN	106	66.3	20.7	2310.84	1848.14	146.287	82.2271	1.9577	0.910126	Not Detected
KHYF1521	H202402390	Pregnant	normal	126.4	89.8	29.1	2948.78	2686.68	92.5898	31.3926	0.0791692	0.71874	Not Detected
KHYF1522	H202402412	Pregnant	normal	128	94.7	32.6	3575.05	3109.74	123.273	8.8327	0.23226	0.547918	Not Detected
KHYF1523	H202402414	Pregnant	normal	71	93.3	20.2	2472.85	2263.41	60.1686	20.8592	0.334135	0.633869	Not Detected
KHYF1524	H202402417	Pregnant	normal	120	88.5	30.6	3087.83	2703.51	93.955	17.4869	0.185934	0.585976	Not Detected
KHYF1525	H202402419	Pregnant	normal	147	97.7	34.1	3651.21	3051.36	118.424	15.0476	0.496406	0.746956	Not Detected
KHYF1526	H202402421	Pregnant	normal	149	89.8	29.9	3589.96	3245.03	111.199	51.9372	1.15853	0.828282	Not Detected
KHYF1527	H202402422	Pregnant	normal	129	97.5	32.7	3212.33	2937.63	96.0177	5.74104	0.461563	0.550183	Not Detected
KHYF1528	H202402425	Pregnant	normal	138	91.2	31.3	3662.24	3219.02	120.639	28.7017	0.228497	0.706693	Not Detected
KHYF1529	H202402457	Pregnant	normal	149	87.4	28.4	3411.61	3054.59	109.069	20.4081	1.1361	0.700299	Not Detected
KHYF1530	H202402464	Non-pregnant	normal	118	90.1	31.5	2401.02	1760.38	73.108	39.7514	0.491702	0.854996	Not Detected
KHYF1531	H202402465	Pregnant	normal	126	97.3	30.7	3001.7	2711.13	105.626	31.6193	0.001	0.796462	Not Detected
KHYF1532	H202402468	Pregnant	β0/βN	98	67.02	22.22	2466.35	2097.83	158.551	61.2445	0.537877	0.768194	Not Detected
KHYF1533	H202402472	Non-pregnant	normal	106	73.3	22.3	2457.81	2220.91	69.6615	10.3288	0.033185	0.490768	Not Detected
KHYF1534	H202402474	Non-pregnant	normal	132	95.6	32	2847.7	2508.83	95.8535	8.77157	0.008053	0.499929	Not Detected
KHYF1535	H202402481	Pregnant	normal	131	96.86	30.2	2559.59	2150.53	79.863	7.68215	0.721778	0.569904	Not Detected
KHYF1536	H202402485	Non-pregnant	normal	135	95.1	31.7	3275.17	2981.22	102.064	13.2018	0.901152	0.583882	Not Detected
KHYF1537	H202402486	Pregnant	β0/βN	102	67.2	22.3	1775.24	1350.31	105.831	62.3887	1.51771	0.84397	Not Detected
KHYF1538	H202402488	Pregnant	normal	145	92.2	31.3	2132.93	1648.25	65.2825	16.815	0.0913668	0.972656	Not Detected
KHYF1539	H202402490	Pregnant	normal	138	91	32.7	3793.97	3171.86	114.638	7.68108	0.737814	0.808524	Not Detected
KHYF1540	H202402493	Pregnant	normal	137	94	32.4	3497.74	2950.55	97.4873	11.9614	0.799075	0.57945	Not Detected
KHYF1541	H202402494	Pregnant	normal	137	88	29.4	3883.05	3351.38	119.8	28.5295	1.04488	0.848558	Not Detected
KHYF1542	H202402495	Pregnant	normal	147	96	33	3157.09	2855.66	89.2291	126.237	2.53663	1.36286	Not Detected
KHYF1543	H202402497	Non-pregnant	normal	154	84.1	28.7	2954.42	2664.58	87.931	7.48558	0.0591839	0.544085	Not Detected
KHYF1544	H202402499	Non-pregnant	normal	146	89.7	30	3638.5	3027.94	116.372	20.1351	0.849408	0.578118	Not Detected
KHYF1545	H202402503	Non-pregnant	normal	131	94.7	31.6	3646.35	3188.89	97.7819	14.4256	0.757781	0.495807	Not Detected
KHYF1546	H202402504	Pregnant	normal	125	89.2	31.1	1846.01	1457.75	49.0495	7.69034	0.173275	0.435268	Not Detected
KHYF1547	H202402505	Pregnant	normal	128	86.9	30	3367.23	2934.91	104.171	20.5624	0.180734	0.87209	Not Detected
KHYF1548	H202402506	Non-pregnant	normal	139	92.7	29.1	2830.33	2523.21	76.368	2.46172	0.565639	0.43176	Not Detected
KHYF1549	H202402507	Pregnant	normal	136	94.4	31.8	3032.51	2644.96	103.243	25.6487	0.277771	1.00255	Not Detected
KHYF1550	H202402508	Non-pregnant	normal	135	82.4	27.6	2905.76	2590.56	85.8124	10.3578	0.001	0.532674	Not Detected
KHYF1551	H202402509	Non-pregnant	normal	145	93.4	30.7	3237.71	2744.58	99.4679	96.2503	0.730556	1.58249	Not Detected
KHYF1552	H202402511	Non-pregnant	normal	150	99.8	34.2	3332.05	3099.07	100.076	42.7178	1.23136	0.853072	Not Detected
KHYF1553	H202402512	Non-pregnant	normal	165	90.6	32	3589.1	3170.53	100.303	108.348	0.595913	1.80863	Not Detected
KHYF1554	H202402513	Non-pregnant	normal	151	93.6	30.2	3477.23	3154.35	96.8718	18.2478	0.171209	0.671742	Not Detected
KHYF1555	H202402514	Non-pregnant	normal	144	85.32	28.7	3226.88	2851.55	103.515	43.9416	0.085176	0.828504	Not Detected
KHYF1556	H202402515	Pregnant	normal	139	90.6	28.1	2676.21	2380.07	78.7776	4.70456	0.566471	0.576223	Not Detected
KHYF1557	H202402516	Non-pregnant	normal	129	93.8	31	2757.27	2584.41	79.0089	6.92116	1.09082	0.591327	Not Detected
KHYF1558	H202402523	Pregnant	normal	130	89.1	29.6	2782.32	2307	89.1955	10.2198	0.076692	0.613956	Not Detected
KHYF1559	H202402524	Non-pregnant	normal	132	88.8	27.5	2963.37	2606.13	78.0801	2.49994	0.0558692	0.467828	Not Detected
KHYF1560	H202402525	Pregnant	normal	125	89.4	28.9	2878.42	2502.3	79.6915	12.6012	0.666238	0.561505	Not Detected
KHYF1561	H202402527	Pregnant	normal	132	88	29.3	2596.73	2316.56	82.3547	3.18603	0.721753	0.520812	Not Detected
KHYF1562	H202402528	Pregnant	normal	129	89.3	29.5	3196.93	2819.76	102.564	5.72739	0.0291337	0.530913	Not Detected
KHYF1563	H202402542	Pregnant	normal	113	95.4	30.9	2654.06	2565.27	92.5115	2.59466	0.91686	0.537825	Not Detected
KHYF1564	H202402549	Non-pregnant	normal	140	100	33.3	3396.28	2949.43	95.8312	4.21409	1.62968	0.655085	Not Detected
KHYF1565	H202402550	Pregnant	normal	148	91.1	30.8	3115.33	2606.68	85.9541	43.386	1.62758	0.933214	Not Detected
KHYF1566	H202402556	Non-pregnant	normal	139	90	30.3	3547.96	3147.45	120.572	24.4914	1.20313	0.861434	Not Detected
KHYF1567	H202402557	Pregnant	normal	122	89.8	29.8	3106.79	2662.03	98.8599	15.9687	0.0773455	0.813778	Not Detected
KHYF1568	H202402567	Pregnant	normal	135	91.6	29.8	2897.3	2470.44	79.5273	0.001	0.1438	0.55537	Not Detected
KHYF1569	H202402581	Pregnant	normal	129	95.2	31	3089.51	2717.35	92.1198	14.3093	0.001	1.08743	Not Detected
KHYF1570	H202402589	Pregnant	normal	151	93.7	31.6	3263.57	2851.72	100.434	49.7899	0.9975	1.09106	Not Detected
KHYF1571	H202402593	Non-pregnant	normal	160	88.1	31.7	3714.46	3206.61	115.354	19.6413	0.796916	1.02838	Not Detected
KHYF1572	H202402603	Pregnant	normal	131	94	31.1	3047.18	2688.31	84.3465	10.5993	0.0095004	0.806452	Not Detected
KHYF1573	H202402607	Pregnant	normal	148	93.1	30.6	3468.44	2991.01	106.518	9.95691	0.314773	0.632981	Not Detected
KHYF1574	H202402608	Pregnant	normal	123	93.9	30	2606.62	2246.45	74.0107	0.503965	0.101296	0.411877	Not Detected
KHYF1575	H202402610	Pregnant	α3.7/αα	136	83.3	26.4	2737.17	2344.54	71.0528	15.399	0.310565	1.22426	Not Detected
KHYF1576	H202402611	Pregnant	normal	121	93.3	31.2	2996.26	2552.86	85.8982	16.0376	0.837715	0.590113	Not Detected
KHYF1577	H202402618	Pregnant	normal	147	92.5	29.9	2909.76	2449.97	81.5527	24.3834	0.552418	0.81289	Not Detected
KHYF1578	H202402629	Pregnant	normal	126	86.8	28.6	3172.98	2622.69	80.0085	7.68428	1.4936	0.833684	Not Detected
KHYF1579	H202402645	Non-pregnant	normal	138	86.7	27.8	3319.06	2858.01	89.4715	5.4037	0.278074	0.504798	Not Detected
KHYF1580	H202402646	Pregnant	normal	130	89.4	29.2	3166.69	2898.74	104.895	11.3823	1.53846	0.691382	Not Detected
KHYF1581	H202402647	Pregnant	α3.7/αα	119	86	27.2	2439.59	2022.73	66.9199	2.20272	1.38012	0.99752	Not Detected
KHYF1582	H202402650	Non-pregnant	normal	138	94.1	31.2	3502.85	3020.15	102.888	48.2504	1.90252	0.998038	Not Detected
KHYF1583	H202402655	Pregnant	normal	129	89.4	30.4	2323.1	1931.44	73.5854	4.24269	0.63436	0.67175	Not Detected
KHYF1584	H202402663	Pregnant	normal	155	93	31.6	2580.39	2380.24	81.8026	10.3664	0.001	0.694468	Not Detected
KHYF1585	H202402678	Pregnant	normal	134	92.8	30.7	2623.5	2322.71	77.1924	1.373	0.548402	0.501772	Not Detected
KHYF1586	H202402703	Non-pregnant	normal	149	93	31.6	2858.03	2299.73	74.8387	47.7447	1.6238	1.09217	Not Detected
KHYF1587	H202402714	Non-pregnant	normal	126	82.4	27.9	3288.05	2637.38	82.8582	20.839	0.718654	0.599444	Not Detected
KHYF1588	H202402715	Pregnant	normal	143	93.6	31.2	3008.97	2409.89	87.9422	10.9038	0.70145	0.677226	Not Detected
KHYF1589	H202402722	Pregnant	normal	133	80.7	27	2906.58	2337.87	78.1621	28.5094	0.137886	0.971694	Not Detected
KHYF1590	H202402724	Pregnant	normal	166	89.6	30.2	2949.48	2444.29	91.3514	19.1974	0.001	0.613334	Not Detected
KHYF1591	H202402738	Pregnant	normal	134	92.5	30.4	2894.32	3005.4	95.0292	42.2809	1.91209	1.16972	Not Detected
KHYF1592	H202402747	Pregnant	normal	145	88.4	30.5	3150.84	2540.92	93.8692	24.3145	0.0186413	0.828874	Not Detected
KHYF1593	H202402751	Pregnant	normal	130	89.3	30.3	2771	2159.27	74.0554	11.6413	1.24169	0.65473	Not Detected
KHYF1594	H202402773	Pregnant	normal	135	88.8	29.7	2866.94	2380.78	85.1186	21.1796	1.69201	0.477566	Not Detected
KHYF1595	H202402799	Pregnant	normal	133	94.9	32.1	2639.31	2096.75	66.3753	116.594	1.11191	1.84171	Not Detected
KHYF1596	H202402862	Pregnant	normal	103	97.1	33	2387.33	2325.6	68.0837	61.7228	0.597316	1.01054	Not Detected
KHYF1597	H202402898	Non-pregnant	normal	127	92.7	29.1	3061.84	2647.34	78.5277	7.84821	1.48067	0.609434	Not Detected
KHYF1598	H202402901	Non-pregnant	normal	134	92.5	31.3	3395.59	3274.71	101.318	101.163	1.07369	1.38728	Not Detected
KHYF1599	H202402921	Non-pregnant	normal	131	95.7	31.6	3240.57	2957.15	96.8308	35.3477	0.587857	0.576164	Not Detected
KHYF1600	H202402923	Non-pregnant	normal	144	90.4	28.9	2976.12	2873.2	98.0542	42.6133	0.209378	0.867724	Not Detected
KHYF1601	H202402924	Pregnant	normal	138	79.3	27.1	3054.78	2841.96	137.201	66.7047	0.284046	0.784696	Not Detected
KHYF1602	H202402928	Pregnant	normal	132	101.2	32.7	2305.89	1940.65	62.6901	14.0588	0.0635494	0.800384	Not Detected
KHYF1603	H202402937	Non-pregnant	normal	123	100.5	31.8	2903.35	3032.9	89.5125	9.75868	0.253924	0.677981	Not Detected
KHYF1604	H202402949	Pregnant	normal	133	90.6	30.6	2909.03	2960.62	96.7637	42.3011	0.316756	0.950826	Not Detected
KHYF1605	H202402952	Pregnant	normal	123	87.1	27.3	2615.98	2632.28	79.0238	3.74748	0.0646876	0.602175	Not Detected
KHYF1606	H202402965	Pregnant	normal	133	90.5	30.9	2882.8	2838.46	84.2756	7.80049	0.0876372	0.680622	Not Detected
KHYF1607	H202402970	Non-pregnant	normal	113	78.1	22.9	2896.08	2926.55	73.5854	46.8818	0.819101	0.98679	Not Detected
KHYF1608	H202402972	Pregnant	normal	120	94.2	30.3	2477.06	1855.18	61.8136	12.3234	0.634922	0.836718	Not Detected
KHYF1609	H202402979	Pregnant	normal	119	86.2	28.3	2294.17	2319.31	98.4757	9.84676	1.38978	0.484056	Not Detected
KHYF1610	H202402984	Pregnant	normal	130	93.9	31.6	2402.28	2379.39	77.3863	13.3371	0.219979	0.637658	Not Detected
KHYF1611	H202402998	Non-pregnant	normal	135	90.7	30	2793.76	2779.36	95.2194	35.7121	0.08463	0.595019	Not Detected
KHYF1612	H202402999	Pregnant	normal	126	91.4	30.9	2938.32	2959.22	101.948	13.1888	0.193225	0.759536	Not Detected
KHYF1613	H202403003	Pregnant	normal	105	93.5	30.5	2409.84	2521.98	71.5041	2.15927	0.504538	0.633699	Not Detected
KHYF1614	H202403020	Pregnant	normal	127.6	87.9	29.9	2063.92	1789.25	62.8281	21.9441	0.069914	0.606482	Not Detected
KHYF1615	H202403025	Non-pregnant	normal	150	80.4	26	3398.9	3410.88	103.75	0.515016	1.13081	0.448196	Not Detected
KHYF1616	H202403032	Pregnant	normal	129	95.1	31.4	2783.22	2762.33	93.5596	40.9693	0.665692	0.77848	Not Detected
KHYF1617	H202403038	Pregnant	normal	154	90.3	31.1	2124.15	1819.54	73.9062	8.23469	0.156248	0.808302	Not Detected
KHYF1618	H202403045	Non-pregnant	α3.7/αα	117	83.5	26.8	2750.16	2782.39	86.5435	6.02676	0.133224	1.16439	Not Detected
KHYF1619	H202403059	Pregnant	normal	133	91.5	30.4	2962.68	2898.98	99.6619	15.507	1.21195	0.894438	Not Detected
KHYF1620	H202403067	Non-pregnant	normal	125	93.3	29.9	2554.81	2529.26	41.1232	184.816	0.620634	2.02982	Not Detected
KHYF1621	H202403069	Non-pregnant	normal	146	92.5	28.3	3150.88	3281.85	91.0679	21.8539	0.516256	0.829244	Not Detected
KHYF1622	H202403080	Pregnant	normal	126	83	26.6	2226.46	1925.93	60.743	4.14524	1.42279	0.405365	Not Detected
KHYF1623	H202403085	Non-pregnant	normal	130	89.6	28.8	3101.81	2644.28	89.8035	6.65943	0.99246	0.693772	Not Detected
KHYF1624	H202403088	Pregnant	normal	129	89.1	28.1	2093.5	1638.09	60.4745	0.997982	1.81994	0.51692	Not Detected
KHYF1625	H202403101	Pregnant	normal	113	96.7	31.2	2602.86	2482	75.1334	9.73198	0.138617	0.568705	Not Detected
KHYF1626	H202403172	Non-pregnant	normal	135	89.8	29.8	3098.37	3096.45	95.1598	23.4646	0.734252	0.641173	Not Detected
KHYF1627	H202403181	Pregnant	normal	121	100.5	32.3	2371.11	2405.09	100.751	24.9994	0.112434	1.08277	Not Detected
KHYF1628	H202403183	Pregnant	normal	130	93.1	31.3	2140.66	2069.75	69.3221	61.0427	0.0486058	0.99678	Not Detected
KHYF1629	H202403185	Non-pregnant	normal	137	90.1	28.7	3217.36	3147.62	99.3747	5.66448	0.757394	0.465741	Not Detected
KHYF1630	H202403191	Pregnant	normal	118	93.6	30.3	2765.4	2811.6	101.609	15.5592	0.199399	0.783586	Not Detected
KHYF1631	H202403192	Pregnant	normal	143	88.3	32.3	3226.51	3051.26	98.3937	9.43701	0.15834	0.558604	Not Detected
KHYF1632	H202403193	Pregnant	normal	112	91.8	29.6	2693.65	2558.16	74.9282	9.47357	0.172099	1.29189	Not Detected
KHYF1633	H202403194	Pregnant	normal	137	92.1	31	2770.55	2821.49	89.1433	18.1469	0.0597618	0.846782	Not Detected
KHYF1634	H202403195	Pregnant	normal	141	93.1	31.2	2733.41	2602.63	88.4793	7.23441	0.758806	0.516476	Not Detected
KHYF1635	H202403201	Non-pregnant	normal	138	89.4	29.2	2948.99	2949.84	80.7545	5.67196	1.06924	0.513812	Not Detected
KHYF1636	H202403202	Pregnant	normal	145	86.4	29.8	2794.86	2739.38	84.1637	22.769	0.0213545	0.599045	Not Detected
KHYF1637	H202403203	Pregnant	normal	128	97	32.2	2184.74	1852.29	60.6684	7.54635	0.0642928	0.55873	Not Detected
KHYF1638	H202403206	Pregnant	normal	138	9.8	30.6	3242	3092.47	114.511	43.3374	0.101758	0.891552	Not Detected
KHYF1639	H202403208	Non-pregnant	normal	129	85.5	28.4	3162.97	3080.67	87.9161	5.30458	0.655796	0.589269	Not Detected
KHYF1640	H202403211	Pregnant	normal	131	88.1	29	1990.17	1722.44	60.3589	26.5045	1.16634	0.796684	Not Detected
KHYF1641	H202403214	Pregnant	normal	131	95.2	32.7	2807.82	2387.82	82.6531	61.5922	0.001	1.30765	Not Detected
KHYF1642	H202403219	Pregnant	normal	133	94	30.6	3661.46	3460.52	111.277	152.399	0.0287658	1.47356	Not Detected
KHYF1643	H202403224	Non-pregnant	normal	145	92.1	30.3	3109.81	3064.39	96.5473	21.7268	1.4201	0.677381	Not Detected
KHYF1644	H202403229	Pregnant	normal	138	93.3	30.7	2338.09	2331.79	72.9327	16.4043	0.194653	0.739637	Not Detected
KHYF1645	H202403233	Non-pregnant	normal	145	94.8	31.4	2646.01	2741.18	77.4273	36.0646	0.0914256	1.15055	Not Detected
KHYF1646	H202403234	Pregnant	normal	134	88.4	28.2	3018.86	3017.87	95.9244	22.1387	1.51444	0.704391	Not Detected
KHYF1647	H202403254	Non-pregnant	normal	140	82.7	27.6	3181.28	3082.75	90.225	13.8653	1.40272	0.542738	Not Detected
KHYF1648	H202403335	Pregnant	normal	128	86.7	27.4	2990.63	2444.77	75.678	8.62379	0.893172	0.518178	Not Detected
KHYF1649	H202403356	Pregnant	normal	107	98.5	32.1	3005.09	2898.06	79.4751	9.90658	0.387778	0.649343	Not Detected
KHYF1650	H202403359	Pregnant	normal	133	90	29.6	2657.17	2211.39	75.7078	20.1719	0.0305222	0.599282	Not Detected
KHYF1651	H202403369	Pregnant	normal	144	89.1	30.1	3725.9	3523.42	104.097	80.3136	1.17382	1.32934	Not Detected
KHYF1652	H202403413	Pregnant	normal	169	91.3	31.9	3056.74	2829.14	102.478	41.2945	0.34057	1.00559	Not Detected
KHYF1653	H202403414	Pregnant	normal	124	90.2	29	3632.58	3488.74	109.807	11.3953	0.0443528	0.827394	Not Detected
KHYF1654	H202403426	Non-pregnant	normal	130	96.9	31	3269.33	3263.69	108.263	26.025	1.23883	0.791652	Not Detected
KHYF1655	H202403432	Pregnant	normal	130	88.1	29.8	3281.1	3211.37	104.511	25.657	0.0395438	0.69207	Not Detected
KHYF1656	H202403445	Pregnant	normal	140	86.7	27.9	3011.5	2943.07	92.8472	31.2027	0.056831	0.586213	Not Detected
KHYF1657	H202403447	Non-pregnant	normal	134	90.4	29	3325.23	3257	128.659	6.58643	0.583951	0.41363	Not Detected
KHYF1658	H202403460	Pregnant	normal	140	90.7	29.5	2889.5	2830.81	96.6294	14.6084	0.63378	0.53986	Not Detected
KHYF1659	H202403462	Pregnant	--SEA/αα	126	68.6	22.5	3043.66	2846.48	86.5397	19.3481	67.4999	1.48821	Not Detected
KHYF1660	H202403463	Pregnant	βHb E/βN	131	77.3	25.6	3781.39	3523.42	142.609	19.5962	0.89418	0.445362	Detected
KHYF1661	H202403465	Non-pregnant	normal	123	88	30.7	3518.29	3150.37	93.2686	6.67711	1.08234	0.617671	Not Detected
KHYF1662	H202403466	Pregnant	normal	122	85.8	28.9	3305.86	3124.57	95.1971	3.52788	0.166622	0.77811	Not Detected
KHYF1663	H202403468	Non-pregnant	normal	158	88.9	46.6	3491.85	3258.63	104.194	4.59773	0.001	0.510393	Not Detected
KHYF1664	H202403469	Non-pregnant	normal	140	94.9	30.8	3831.65	3556.4	110.539	26.8476	2.53722	0.76183	Not Detected
KHYF1665	H202403470	Pregnant	normal	136	79	26	3498.72	3236.02	106.577	11.6404	0.104849	0.638161	Not Detected
KHYF1666	H202403471	Non-pregnant	normal	133	90	30.9	4024.71	3640.38	116.999	12.0089	0.925512	0.841158	Not Detected
KHYF1667	H202403475	Non-pregnant	normal	127	86	27.4	3716.75	3295.45	114.466	107.461	0.001	1.41873	Not Detected
KHYF1668	H202403476	Non-pregnant	normal	135	90.7	31.3	3621.46	3263.08	108.879	14.9325	0.642457	0.721337	Not Detected
KHYF1669	H202403477	Non-pregnant	normal	155	92.6	31.7	3992.23	3641.74	114.608	138.843	0.777386	1.79435	Not Detected
KHYF1670	H202403482	Non-pregnant	normal	136	89.1	30.9	4034.8	3678.8	119.371	86.4824	0.270757	0.923002	Not Detected
KHYF1671	H202403483	Non-pregnant	normal	145	91.3	28.7	3398.16	2982.89	97.9871	17.8382	0.001	0.845524	Not Detected
KHYF1672	H202403486	Pregnant	normal	129	90.8	32	3492.47	3253.46	104.888	13.749	0.064596	0.758278	Not Detected
KHYF1673	H202403489	Non-pregnant	normal	151	87.9	28.7	3562.5	3479.56	120.99	5.03003	0.0183422	0.502245	Not Detected
KHYF1674	H202403490	Non-pregnant	normal	142	85.9	28.6	3622.44	3338.83	99.7551	33.9458	0.001	0.518969	Not Detected
KHYF1675	H202403491	Non-pregnant	normal	126	89.9	29.6	4018.09	3639.02	126.589	9.92498	1.54812	0.498671	Not Detected
KHYF1676	H202403493	Non-pregnant	normal	141	88.9	29.6	3739.71	3568.98	110.266	14.6915	0.272194	0.573315	Not Detected
KHYF1677	H202403494	Non-pregnant	normal	126	92.5	29.7	3508.08	3294.74	105.615	17.5913	0.0782183	0.602767	Not Detected
KHYF1678	H202403496	Non-pregnant	normal	135	95.9	31	2574.75	2081.99	65.6555	88.6238	0.0393826	1.00033	Not Detected
KHYF1679	H202403497	Pregnant	normal	129	97	32.6	3801.16	3445.56	125.373	37.4558	0.001	0.786102	Not Detected
KHYF1680	H202403498	Pregnant	normal	147	90.4	30.1	3524.71	3327	101.135	6.23828	0.487057	0.507529	Not Detected
KHYF1681	H202403500	Non-pregnant	normal	138	92	29.7	3472.77	3337.51	119.875	28.1414	0.00634334	0.86617	Not Detected
KHYF1682	H202403501	Pregnant	normal	138	92.9	30.7	3666	3411.56	120.423	24.6184	0.16716	1.28575	Not Detected
KHYF1683	H202403504	Non-pregnant	normal	143	89.1	28.9	3838.59	3657.72	118.129	36.0373	0.001	0.967106	Not Detected
KHYF1684	H202403505	Pregnant	normal	140	91.4	28.5	3696.73	3447.6	110.941	11.848	1.15996	0.841602	Not Detected
KHYF1685	H202403507	Non-pregnant	normal	143	90.1	30.3	3538.52	3404.42	97.3978	33.8046	0.001	0.781292	Not Detected
KHYF1686	H202403562	Pregnant	α3.7/αα	128	78.8	26.1	4192.24	3883.82	116.29	16.5492	1.21027	1.63866	Not Detected
KHYF1687	H202403565	Non-pregnant	α3.7/αα	142	89.3	28.6	3797.94	3356.55	94.0743	16.8958	0.0987924	1.30173	Not Detected
KHYF1688	H202403612	Non-pregnant	normal	124	86.4	29.5	3833.16	3428.22	116.286	46.1339	0.938784	0.820216	Not Detected
KHYF1689	H202403616	Non-pregnant	normal	146	95.4	31.7	4296.84	3933.12	137.156	16.5017	0.0498103	0.596262	Not Detected
KHYF1690	H202403658	Pregnant	normal	137	93.8	31.3	3480.78	3289.23	110.33	26.8761	0.02058	1.1006	Not Detected
KHYF1691	H202403672	Pregnant	normal	138	92.7	30.6	3333.56	3149.08	102.075	5.5078	0.001	0.904946	Not Detected
KHYF1692	H202403673	Pregnant	normal	123	88.9	29.8	3466.44	3077.41	96.2079	35.4581	0.0123698	1.16639	Not Detected
KHYF1693	H202403676	Pregnant	normal	133	87	29	3552.04	3398.13	120.994	64.5004	0.17456	1.04495	Not Detected
KHYF1694	H202403687	Pregnant	normal	130	92.7	30.7	3030.71	2887.42	91.0605	44.3867	0.727751	1.03001	Not Detected
KHYF1695	H202403689	Pregnant	normal	116	94.4	32.4	3298.22	3036.44	98.1139	157.622	0.001	2.47989	Not Detected
KHYF1696	H202403692	Pregnant	normal	110	82.6	27.3	3019.1	2877.25	83.4476	10.2273	0.198576	0.802382	Not Detected
KHYF1697	H202403693	Pregnant	normal	149	92.4	30.7	3160.52	3204.87	109.27	17.4774	0.0417236	0.763828	Not Detected
KHYF1698	H202403700	Non-pregnant	normal	148	86.9	28.5	3444.54	3163.87	106.145	7.88548	0.235847	0.429925	Not Detected
KHYF1699	H202403702	Pregnant	normal	131	83.9	27.4	2780.4	2205.24	83.0074	13.1994	0.0501194	0.55423	Not Detected
KHYF1700	H202403718	Non-pregnant	normal	101	80.9	23.9	2604.25	2406.55	63.7867	41.1782	0.0667204	0.838272	Not Detected
KHYF1701	H202403727	Non-pregnant	normal	145	92.9	30.1	3538.93	3379.57	115	44.3285	0.738671	0.744662	Not Detected
KHYF1702	H202403728	Pregnant	normal	123	92.8	30.5	2722.09	2153.93	70.4746	47.4254	0.323786	0.547067	Not Detected
KHYF1703	H202403731	Pregnant	normal	123	97.4	32	3095.84	2938.59	94.6488	2.53852	0.0030203	0.654774	Not Detected
KHYF1704	H202403737	Pregnant	normal	142	87.4	28.9	3703.43	3364.5	104.082	79.4851	2.16115	1.11829	Not Detected
KHYF1705	H202403760	Pregnant	normal	134	89.2	32.1	3267.86	2993.77	101.781	35.9768	0.423998	0.72133	Not Detected
KHYF1706	H202403763	Non-pregnant	normal	138	91.8	30.5	3796.38	3678.46	121.949	10.4429	0.780755	0.514751	Not Detected
KHYF1707	H202403772	Pregnant	normal	132	91.1	31.3	3389.66	3049.56	112.105	91.5367	0.0196375	1.17645	Not Detected
KHYF1708	H202403773	Pregnant	normal	127	84.6	28.2	3029.73	2420.09	78.0055	4.63357	0.707414	0.852998	Not Detected
KHYF1709	H202403803	Pregnant	normal	146	97.4	32.4	3912.26	3641.06	131.565	75.5454	2.20777	1.14804	Not Detected
KHYF1710	H202403858	Non-pregnant	normal	134	90.3	30.2	3693.38	3517.98	95.2157	2.61864	0.0736504	0.53744	Not Detected
KHYF1711	H202403864	Pregnant	normal	148	92.7	32.5	3719.08	3468.68	110.781	8.14448	0.00666422	0.587057	Not Detected
KHYF1712	H202403877	Pregnant	normal	126	99.7	33.1	3416.18	3161.46	103.008	58.4087	1.65396	0.97162	Not Detected
KHYF1713	H202403878	Non-pregnant	normal	139	87.1	29.8	3708.49	3509.14	106.999	7.739	0.475784	0.700536	Not Detected
KHYF1714	H202403879	Pregnant	normal	143	92.9	31	3181.93	2990.57	100.695	28.5889	0.0286196	1.15899	Not Detected
KHYF1715	H202403886	Pregnant	normal	151	88.4	30.1	3702.37	3493.16	120.031	26.6482	1.8527	0.937062	Not Detected
KHYF1716	H202403887	Non-pregnant	normal	136	86.9	29.1	3961.87	3889.26	121.158	3.75816	1.16752	0.613208	Not Detected
KHYF1717	H202403890	Pregnant	normal	127	80.9	26.3	3470.2	3296.67	103.534	22.0699	0.90426	0.80993	Not Detected
KHYF1718	H202403901	Pregnant	normal	146	91.9	30.2	3926.32	3577.48	121.777	28.8797	0.445805	0.869204	Not Detected
KHYF1719	H202403906	Pregnant	normal	112	95.8	31.5	2937.18	2795.38	96.2116	22.7548	0.809365	0.871128	Not Detected
KHYF1720	H202403908	Pregnant	normal	129	89.7	30.8	3496.8	3237.82	108.222	22.8201	0.0429332	1.09069	Not Detected
KHYF1721	H202403922	Non-pregnant	normal	159	91.2	30.3	3301.2	2753.25	104.444	33.2194	0.038299	0.800458	Not Detected
KHYF1722	H202403926	Non-pregnant	normal	145	89.5	28.7	3674.87	3421.08	90.4339	5.46471	0.205909	0.625093	Not Detected
KHYF1723	H202403948	Pregnant	normal	136	89.8	30	3397.92	3207.25	100.971	135.888	2.22407	1.65553	Not Detected
KHYF1724	H202403955	Pregnant	normal	133	89.1	30.3	3591.43	3397.01	111.852	74.4142	0.001	1.02705	Not Detected
KHYF1725	H202403964	Non-pregnant	normal	144	94.5	31.8	3709.72	3704.98	107.92	2.22705	1.4611	0.547829	Not Detected
KHYF1726	H202403969	Non-pregnant	normal	140	93.6	30	4097.85	3863.08	130.397	26.6422	0.00607152	1.18289	Not Detected
